# Supplementary material for: Organophotocatalytic access to C-glycosides: multicomponent coupling reactions using glycosyl bromides
Source: Royal Society of Chemistry journal article supplement (doi:10.1039/d4cc02833c), 2024-01-01

## Electronic Supplementary Information

### Organo Photocatalytic Access to C-Glycosides: Multicomponent Coupling Reactions Using Glycosyl Bromides

Naoya Sawada,<sup>a</sup> Ziyi Yu,<sup>a</sup> Hiryu Takinami,<sup>a</sup> Daichi Inoue,<sup>a</sup> Titli Ghosh,<sup>a</sup> Norihiko Sasaki,<sup>a,b</sup>  
Toshiki Nokami,<sup>\*a,b</sup> Tsuyoshi Taniguchi,<sup>c</sup> Manabu Abe<sup>\*d</sup>, and Takashi Koike<sup>e</sup>

<sup>a</sup>*Department of Chemistry and Biotechnology, Tottori University, 4-101 Koyamachominami,  
Tottori city, 680-8552 Tottori, Japan*

<sup>b</sup>*Centre for Research on Green Sustainable Chemistry, Faculty of Engineering,  
Tottori University, 4-101 Koyamachominami, Tottori city, 680-8552 Tottori, Japan*

<sup>c</sup>*Interdisciplinary Research Center for Catalytic Chemistry, National Institute of Advanced  
Industrial Science and Technology, 1-1-1 Higashi, Tsukuba city, Ibaraki, 305-8565, Japan*

<sup>d</sup>*Department of Chemistry, Graduate School of Advanced Science and Engineering, Hiroshima  
University, Higashi-Hiroshima city, Hiroshima, 739-8526, Japan*

<sup>e</sup>*Department of Applied Chemistry, Faculty of Fundamental Engineering, Nippon Institute of  
Technology, E24-315, 4-1 Gakuendai, Miyashiro-Machi, Minamisaitama-Gun, 345-8501  
Saitama, Japan*

E-mail: [tnokami@tottori-u.ac.jp](mailto:tnokami@tottori-u.ac.jp), [mabe@hiroshima-u.ac.jp](mailto:mabe@hiroshima-u.ac.jp)

---

## Contents

|                                                                     |     |
|---------------------------------------------------------------------|-----|
| 1. General                                                          | S2  |
| 2. Photochemical multi-components reactions                         | S2  |
| 3. Cyclic Voltammetry                                               | S19 |
| 4. Stern-Volmer Plots                                               | S20 |
| 5. Control experiment in the presence of TEMPO                      | S21 |
| 6. References                                                       | S22 |
| 7. <sup>1</sup> H, <sup>13</sup> C, and <sup>19</sup> F NMR spectra | S23 |

## 1. General

The NMR spectra were recorded on Bruker AVANCE II. 600 ( $^1\text{H}$  NMR; 600 MHz,  $^{13}\text{C}$  NMR; 150 MHz) and JEOL JNM-ECZ600 ( $^1\text{H}$  NMR; 600 MHz,  $^{13}\text{C}$  NMR; 150 MHz,  $^{19}\text{F}$  NMR; 565 MHz) at room temperature using chloroform- $d$  as the deuterated solvent and chloroform as the internal standard for  $^1\text{H}$  (7.26 ppm) and  $^{13}\text{C}$  (77.0 ppm) and hexafluorobenzene as the internal standard for  $^{19}\text{F}$  (0 ppm). NMR yields were based on 1,1,2,2-tetrachloroethane as an internal standard. Fourier transform mass spectrometry (ESI) was measured on Thermo Fisher SCIENTIFIC Exactive-Orbitrap MS1.1. Cyclic voltammetry and transient absorption spectra were recorded on UNISOKU picoTAS and BAS model 700E electrochemical analyzer, respectively. Silica gel (KANTO, spherical, neutral, 63-210  $\mu\text{m}$ ) was used for purification by column chromatography. 1,1-Diphenylethylene was washed with 0.5 M NaOH aqueous solution to remove a polymerization inhibitor, and other styrene derivatives were distilled under reduced pressure. Glycosyl bromides **1a-c**<sup>1</sup> and **2e**<sup>2</sup> were synthesized according to the reported procedure. Techno Sigma PER-AMP and LED ramps (365 nm, 507 mW) were used for photoirradiation.

## 2. Photochemical multi-components reactions

### 2-1-1. Two-component coupling reaction between **1a** and **2a**

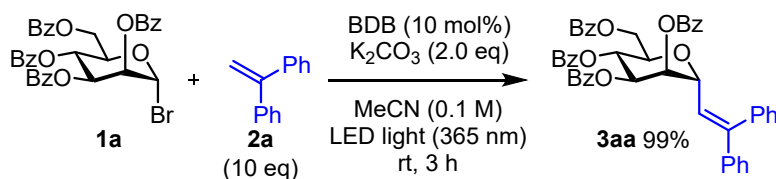

Glycosyl bromide **1a** (0.20 mmol, 132 mg), organic photocatalytic BDB (0.02 mmol, 8.3 mg), and potassium carbonate (0.40 mmol, 55.3 mg) were added to the dried Schrenk tube under argon. Dry MeCN (2.0 mL) and 1,1-diphenylethylene (**2a**) (2.0 mmol, 0.35 mL) were added and stirred. Then the LED ramp was attached to the Schrenk tube using a Teflon joint, and freeze degassing were performed using liquid nitrogen. The reaction was performed by irradiating LED light (wavelength: 365 nm) for 3 h in water bath. After photo irradiation the reaction mixture was diluted with  $\text{CHCl}_3$ , concentrated under vacuum. Tetrachloroethane was added as an internal standard and  $^1\text{H}$  NMR measurement was performed to determine NMR yield of **3aa** (99%). **3aa** was isolated by silica gel column (eluent: Hexane/EtOAc = 4:1) and preparative GPC (eluent:  $\text{CHCl}_3$ ). **(2R,3R,4R,5R,6R)-2-((benzyloxy)methyl)-6-(2,2-diphenylvinyl)tetrahydro-2H-pyran-3,4,5-triyl tribenzoate (3aa)** TLC (Hexane/EtOAc 3:1):  $R_f$  = 0.43.  $^1\text{H}$  NMR ( $\text{CDCl}_3$ , 600 MHz)  $\delta$  8.10 (dd,  $J$  = 8.4, 1.2 Hz, 2 H), 7.99 (dd,  $J$  = 8.4, 1.2 Hz, 2 H), 7.97 (dd,  $J$  = 8.4, 1.2 Hz, 2 H), 7.81 (dd,  $J$  = 8.4, 1.2 Hz, 2 H), 7.58–7.51 (m, 3 H), 7.50–7.45 (m, 1 H), 7.43–7.27 (m, 18 H), 6.47 (d,  $J$  = 9.0 Hz, 1 H), 6.03 (*pseudo-t*,  $J$  = 7.2 Hz, 1 H), 5.99 (dd,  $J$  = 9.0, 3.0 Hz, 1 H), 5.82 (*pseudo-t*,  $J$  = 3.0 Hz, 1 H), 4.85 (dd,  $J$  = 9.0, 3.6 Hz, 1 H), 4.56–4.51 (m, 3 H);  $^{13}\text{C}$  NMR ( $\text{CDCl}_3$ , 150 MHz)  $\delta$  166.2, 165.6, 165.3,

150.5, 141.6, 138.2, 133.4, 133.30, 133.26, 133.0, 129.73, 129.70, 129.4, 129.0, 128.9, 128.44, 128.42, 128.38, 128.31, 128.30, 128.1, 128.0, 120.2, 72.3, 71.5, 71.3, 70.1, 67.9, 63.0; HRMS (ESI)  $m/z$  calc for  $C_{48}H_{38}KO_9$   $[M+K]^+$  797.2147; found 797.2162.

## 2-1-2. Two-component coupling reaction between **1a** and **2c**

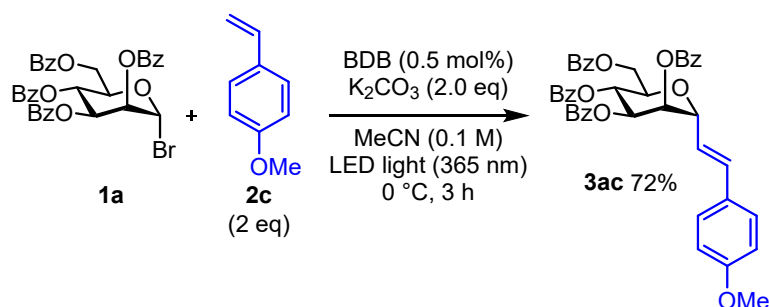

Glycosyl bromide **1a** (0.20 mmol, 132 mg), organic photocatalytic BDB (0.001 mmol, 0.41 mg), and potassium carbonate (0.40 mmol, 55.3 mg) were added to the dried Schrenk tube under argon. Dry MeCN (2.0 mL) and 4-methoxystyrene **2c** (0.4 mmol, 54  $\mu$ L) were added and stirred. Then the LED ramp was attached to the Schrenk tube using a Teflon joint, and freeze degassing were performed using liquid nitrogen. The reaction was performed by irradiating LED light (wavelength: 365 nm) for 3 h in ice bath. After photo irradiation the reaction mixture was diluted with  $CHCl_3$ , concentrated under vacuum. Tetrachloroethane was added as an internal standard and  $^1H$  NMR measurement was performed to determine NMR yield of **3ac** (72%). **3ac** was isolated by silica gel column (eluent: Hexane/EtOAc = 3:1) and preparative GPC (eluent:  $CHCl_3$ ). **(2R,3R,4R,5R,6R)-2-((benzoyloxy)methyl)-6-((E)-4-methoxystyryl)tetrahydro-2H-pyran-3,4,5-triyl tribenzoate (3ac)** TLC (Hexane/EtOAc 3:1):  $R_f$  0.32.  $^1H$  NMR ( $CDCl_3$ , 600 MHz)  $\delta$  8.13 (d,  $J$  = 7.8 Hz, 2 H), 8.08 (d,  $J$  = 7.8 Hz, 2 H), 7.97 (d,  $J$  = 7.8 Hz, 2 H), 7.87 (d,  $J$  = 7.8 Hz, 2 H), 7.59 (t,  $J$  = 7.2 Hz, 2 H), 7.51 (t,  $J$  = 7.8 Hz, 1 H), 7.48–7.38 (m, 7 H), 7.35 (t,  $J$  = 7.8 Hz, 2 H), 7.30 (t,  $J$  = 7.8 Hz, 2 H), 6.94–6.89 (m, 3 H), 6.29 (dd,  $J$  = 16.2, 4.2 Hz, 1 H), 6.17 (t,  $J$  = 9.6 Hz, 1 H), 5.99 (s, 1 H), 5.79 (dd,  $J$  = 9.6, 2.4 Hz, 1 H), 5.04–4.99 (m, 1 H), 4.73 (d,  $J$  = 12.0 Hz, 1 H), 4.54 (dd,  $J$  = 12.0, 4.2 Hz, 1 H), 4.49–4.44 (m, 1 H), 3.85 (s, 3 H);  $^{13}C$  NMR ( $CDCl_3$ , 150 MHz)  $\delta$  169.5, 166.2, 165.6, 165.5, 165.4, 138.0, 133.9, 133.47, 133.41, 133.3, 133.1, 129.81, 129.79, 129.74, 129.65, 129.23, 129.16, 128.79, 128.76, 128.48, 128.47, 128.42, 128.35, 72.4, 71.6, 70.6, 70.3, 67.1, 63.1, 50.5, 34.2, 23.2; HRMS (ESI)  $m/z$  calc for  $C_{44}H_{36}KNO_{10}$   $[M+K]^+$  751.1940; found 751.1950.

### 2-1-3. Two-component coupling reaction between **1b** and **2a**

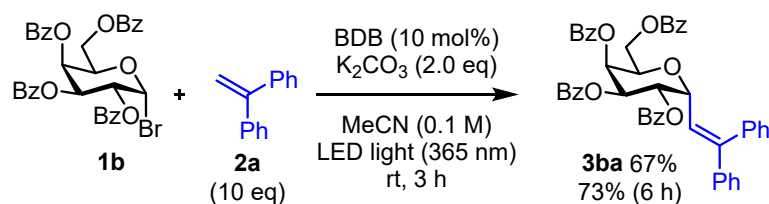

Glycosyl bromide **1b** (0.20 mmol, 132 mg), organic photocatalytic BDB (0.02 mmol, 8.3 mg), and potassium carbonate (0.40 mmol, 55.3 mg) were added to the dried Schrenk tube under argon. Dry MeCN (2.0 mL) and 1,1-diphenylethylene (**2a**) (2.0 mmol, 0.35 mL) were added and stirred. Then the LED ramp was attached to the Schrenk tube using a Teflon joint, and freeze degassing were performed using liquid nitrogen. The reaction was performed by irradiating LED light (wavelength: 365 nm) for 3 h in water bath. After photo irradiation the reaction mixture was diluted with CHCl<sub>3</sub>, concentrated under vacuum. Tetrachloroethane was added as an internal standard and <sup>1</sup>H NMR measurement was performed to determine NMR yield of **3ba** (67%). **3ba** was isolated by silica gel column (eluent: Hexane/EtOAc = 4:1) and preparative GPC (eluent: CHCl<sub>3</sub>). **((2R,3S,4R,5S,6R)-2-((benzoyloxy)methyl)-6-(2,2-diphenylvinyl)tetrahydro-2H-pyran-3,4,5-triyl tribenzoate (3ba)** TLC (Hexane/EtOAc 3:1): R<sub>f</sub> 0.39. <sup>1</sup>H NMR (CDCl<sub>3</sub>, 600 MHz) δ 8.03 (t, *J* = 9.0 Hz, 4 H), 7.97 (d, *J* = 7.2 Hz, 2 H), 7.81 (d, *J* = 7.2 Hz, 2 H), 7.61–7.58 (m, 1 H), 7.56–7.51 (m, 2 H), 7.49–7.44 (m, 3 H), 7.42–7.37 (m, 4 H), 7.34–7.22 (m, 10 H), 7.17 (d, *J* = 6.6 Hz, 2 H), 6.53 (d, *J* = 9.0 Hz, 1 H), 6.08–6.03 (m, 2 H), 5.80 (dd, *J* = 9.0, 5.4 Hz, 1 H), 5.12 (dd, *J* = 9.6, 6.0 Hz, 1 H), 4.68 (*pseudo-t*, *J* = 6.0 Hz, 1 H), 4.60 (dd, *J* = 11.4, 7.2 Hz, 1 H), 4.33 (dd, *J* = 11.4, 7.2 Hz, 1 H); <sup>13</sup>C NMR (CDCl<sub>3</sub>, 150 MHz) δ 166.0, 165.6, 165.5, 165.3, 151.5, 141.7, 138.3, 133.5, 133.4, 133.3, 133.1, 129.9, 129.7, 129.63, 129.61, 129.5, 129.12, 129.06, 128.9, 128.5, 128.4, 128.35, 128.29, 128.24, 128.19, 128.0, 127.9, 127.8, 70.7, 69.4, 69.2, 69.1, 68.7, 62.2; HRMS (ESI) *m/z* calc for C<sub>49</sub>H<sub>42</sub>KO<sub>10</sub> [M+K]<sup>+</sup> 797.2147; found 797.2140.

### 2-1-4. Two-component coupling reaction between **1a** and **2h**

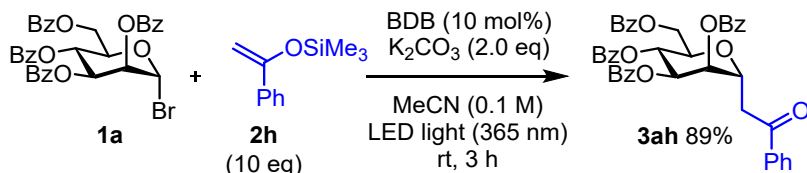

Glycosyl bromide **1a** (0.20 mmol, 132 mg), organic photocatalytic BDB (0.02 mmol, 8.3 mg), and potassium carbonate (0.40 mmol, 55.3 mg) were added to the dried Schrenk tube under argon. Dry MeCN (2.0 mL) and 1-Phenyl-1-trimethylsiloxyethylene (**2h**) (2.0 mmol, 0.41 mL) were added and stirred. Then the LED ramp was attached to the Schrenk tube using a Teflon joint, and freeze degassing were performed using liquid nitrogen. The reaction was performed by irradiating LED light

(wavelength: 365 nm) for 3 h in water bath. After photo irradiation the reaction mixture was diluted with  $\text{CHCl}_3$ , concentrated under vacuum. Tetrachloroethane was added as an internal standard and  $^1\text{H}$  NMR measurement was performed to determine NMR yield of **3ah** (89%). **3ah** was isolated by silica gel column (eluent: Hexane/EtOAc = 3:2). **(2R,3R,4R,5S,6R)-2-((benzoyloxy)methyl)-6-(2-oxo-2-phenylethyl)tetrahydro-2H-pyran-3,4,5-triyl tribenzoate (3ah)** TLC (Hexane/EtOAc 3:1):  $R_f$  0.20.  $^1\text{H}$  NMR ( $\text{CDCl}_3$ , 600 MHz)  $\delta$  8.04 (dd,  $J$  = 8.4, 1.2 Hz, 2 H), 8.02 (dd,  $J$  = 7.8, 1.8 Hz, 2 H), 8.01 (dd,  $J$  = 7.8, 1.2 Hz, 2 H), 7.95 (dd,  $J$  = 8.4, 1.2 Hz, 2 H), 7.91 (dd,  $J$  = 8.4, 1.2 Hz, 2 H), 7.59–7.53 (m, 4 H), 7.50 (t,  $J$  = 7.8 Hz, 4 H), 7.45 (t,  $J$  = 7.8 Hz, 2 H), 7.43–7.38 (m, 6 H), 7.35 (t,  $J$  = 7.8 Hz, 2 H), 5.93 (*pseudo*-t,  $J$  = 7.8 Hz, 1 H), 5.90 (dd,  $J$  = 8.4, 3.6 Hz, 1 H), 5.78 (dd,  $J$  = 4.2, 3.0 Hz, 1 H), 5.06 (dt,  $J$  = 9.0, 4.2 Hz, 1 H), 4.69 (dd,  $J$  = 12.0, 6.0 Hz, 1 H), 4.64 (dd,  $J$  = 12.0, 3.6 Hz, 1 H), 4.46 (td,  $J$  = 6.6, 3.6 Hz, 1H), 3.65 (dd,  $J$  = 16.2, 9.0 Hz, 1 H), 3.41 (dd,  $J$  = 16.2, 5.4 Hz, 1 H);  $^{13}\text{C}$  NMR ( $\text{CDCl}_3$ , 150 MHz)  $\delta$  195.6, 166.1, 165.6, 165.4, 165.3, 136.3, 133.51, 133.49, 133.44, 133.40, 133.0, 129.8, 129.7, 129.3, 128.9, 128.8, 128.7, 128.48, 128.46, 128.44, 128.3, 128.2, 71.6, 70.9, 69.6, 67.8, 62.5, 38.5; HRMS (ESI)  $m/z$  calc for  $\text{C}_{42}\text{H}_{34}\text{KO}_{10}$   $[\text{M}+\text{K}]^+$  737.1784; found 737.1746.

#### 2-2-1. Three-component coupling reaction between **1a**, **2a** and water

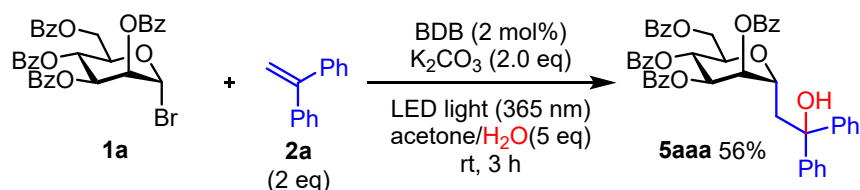

Glycosyl bromide **1a** (0.20 mmol, 132 mg), organic photocatalytic BDB (0.004 mmol, 1.7 mg), and potassium carbonate (0.40 mmol, 55.3 mg) were added to the dried Schrenk tube under argon. Dry MeCN (2.0 mL), 1,1-diphenylethylene (**2a**) (0.4 mmol, 70  $\mu\text{l}$ ) and water (1.0 mmol, 18  $\mu\text{l}$ ) were added and stirred. Then the LED ramp was attached to the Schrenk tube using a Teflon joint, and freeze degassing were performed using liquid nitrogen. The reaction was performed by irradiating LED light (wavelength: 365 nm) for 3 h in water bath. After photo irradiation the reaction mixture was diluted with  $\text{CHCl}_3$ , concentrated under vacuum. Tetrachloroethane was added as an internal standard and  $^1\text{H}$  NMR measurement was performed to determine NMR yield of **5aaa** (56%). **5aaa** was isolated by silica gel column (eluent: Hexane/EtOAc = 5:1) and preparative GPC (eluent:  $\text{CHCl}_3$ ). **(2R,3R,4R,5R,6R)-2-((benzoyloxy)methyl)-6-(2-hydroxy-2,2-diphenylethyl)tetrahydro-2H-pyran-3,4,5-triyl tribenzoate (5aaa)** TLC (Hexane/EtOAc 3:1):  $R_f$  0.40.  $^1\text{H}$  NMR ( $\text{CDCl}_3$ , 600 MHz)  $\delta$  8.17 (d,  $J$  = 7.2 Hz, 2 H), 8.01 (d,  $J$  = 7.2 Hz, 2 H), 7.95 (d,  $J$  = 7.8 Hz, 2 H), 7.79 (d,  $J$  = 7.8 Hz, 2 H), 7.62–7.54 (m, 3 H), 7.53–7.45 (m, 7 H), 7.44–7.37 (m, 4 H), 7.36–7.29 (m, 6 H), 7.27–7.20 (m, 2 H), 5.84–5.81 (m, 2 H), 5.68 (d,  $J$  = 2.4 Hz, 1 H), 4.63–4.59 (m, 1 H), 4.54–4.47

(m, 3 H), 4.29 (s, 1 H), 2.93 (dd,  $J = 15.0, 10.8$  Hz, 1 H), 2.82 (dd,  $J = 15.0, 1.8$  Hz, 1 H);  $^{13}\text{C}$  NMR ( $\text{CDCl}_3$ , 150 MHz)  $\delta$  166.1, 165.4, 165.3, 165.2, 146.6, 145.4, 133.6, 133.4, 133.2, 129.83, 129.81, 129.73, 129.67, 129.55, 129.2, 128.8, 128.5, 128.46, 128.3, 127.07, 127.05, 126.0, 125.5, 78.3, 72.5, 71.7, 71.3, 69.4, 67.7, 62.7, 39.3; HRMS (ESI)  $m/z$  calc for  $\text{C}_{48}\text{H}_{40}\text{KO}_{10}$   $[\text{M}+\text{K}]^+$  815.2253; found 815.2209.

## 2-2-2. Three-component coupling reaction between **1a**, **2a** and methanol

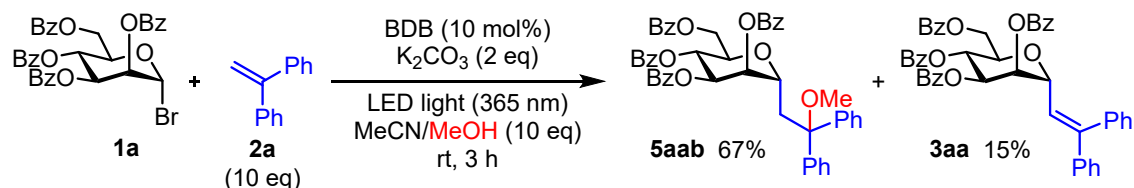

Glycosyl bromide **1a** (0.20 mmol, 132 mg), organic photocatalytic BDB (0.02 mmol, 8.3 mg), and potassium carbonate (0.40 mmol, 55.3 mg) were added to the dried Schrenk tube under argon. Dry MeCN (2.0 mL), 1,1-diphenylethylene (**2a**) (0.4 mmol, 70  $\mu\text{l}$ ) and dry MeOH (2.0 mmol, 81  $\mu\text{L}$ ) were added and stirred. Then the LED ramp was attached to the Schrenk tube using a Teflon joint, and freeze degassing were performed using liquid nitrogen. The reaction was performed by irradiating LED light (wavelength: 365 nm) for 3 h in water bath. After photo irradiation the reaction mixture was diluted with  $\text{CHCl}_3$ , concentrated under vacuum. Tetrachloroethane was added as an internal standard and  $^1\text{H}$  NMR measurement was performed to determine NMR yield of **5aab** (67%). **5aab** was isolated by silica gel column (eluent: Hexane/EtOAc = 4:1) and preparative GPC (eluent:  $\text{CHCl}_3$ ). **(2R,3R,4R,5R,6R)-2-((benzoxyloxy)methyl)-6-(2-methoxy-2,2-diphenylethyl)tetrahydro-2H-pyran-3,4,5-triyl tribenzoate (5aab)** TLC (Hexane/EtOAc 3:1):  $R_f = 0.50$ .  $^1\text{H}$  NMR ( $\text{CDCl}_3$ , 600 MHz)  $\delta$  8.04 (d,  $J = 7.8$  Hz, 2 H), 7.99 (d,  $J = 7.2$  Hz, 2 H), 7.94 (d,  $J = 7.8$  Hz, 2 H), 7.81 (d,  $J = 7.8$  Hz, 2 H), 7.59–7.44 (m, 5 H), 7.42 (d,  $J = 7.8$  Hz, 4 H), 7.39–7.23 (m, 12 H), 7.12 (t,  $J = 7.2$  Hz, 1 H), 6.00 (*pseudo-t*,  $J = 9.0$  Hz, 1 H), 5.82 (dd,  $J = 9.0, 3.0$  Hz, 1 H), 5.49–5.47 (m, 1 H), 4.51–4.47 (m, 1 H), 4.23 (dd,  $J = 12.0, 4.2$  Hz, 1 H), 4.06–4.02 (m, 2 H), 3.13 (s, 3 H), 3.03 (dd,  $J = 15.0, 7.8$  Hz, 1 H), 2.85 (dd,  $J = 15.0, 3.6$  Hz, 1 H);  $^{13}\text{C}$  NMR ( $\text{CDCl}_3$ , 150 MHz)  $\delta$  166.1, 165.7, 165.3, 165.2, 144.9, 144.1, 133.33, 133.26, 133.2, 132.9, 129.9, 129.8, 129.71, 129.67, 129.6, 129.0, 128.9, 128.42, 128.37, 128.34, 128.31, 128.30, 128.0, 127.3, 127.1, 126.8, 126.6, 81.3, 72.5, 71.7, 70.7, 70.3, 67.5, 62.7, 50.8, 34.0; HRMS (ESI)  $m/z$  calc for  $\text{C}_{49}\text{H}_{42}\text{KO}_{10}$   $[\text{M}+\text{K}]^+$  829.2410; found 829.2383.

### 2-2-3. Three-component coupling reaction between **1a**, **2a**, and ethanol

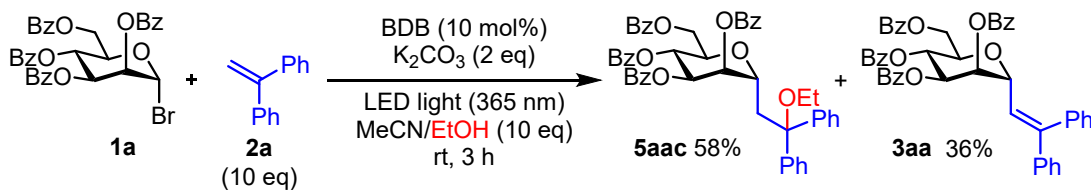

Glycosyl bromide **1a** (0.20 mmol, 132 mg), organic photocatalytic BDB (0.02 mmol, 8.3 mg), and potassium carbonate (0.40 mmol, 55.3 mg) were added to the dried Schrenk tube under argon. Dry MeCN (2.0 mL), 1,1-diphenylethylene (**2a**) (0.4 mmol, 70  $\mu$ L), and dry EtOH (2.0 mmol, 117  $\mu$ L) were added, and the mixture was stirred. The LED ramp was then attached to the Schrenk tube using a Teflon joint, and freeze degassing was performed using liquid nitrogen. The reaction was performed by irradiating LED light (wavelength: 365 nm) for 3 h in water bath. After photoirradiation, the reaction mixture was diluted with  $\text{CHCl}_3$  and concentrated under vacuum. Tetrachloroethane was added as an internal standard and  $^1\text{H}$  NMR measurement was performed to determine NMR yield of **5aac** (58%). **5aac** was isolated by silica gel column (eluent: Hexane/EtOAc = 3:1). (**2R,3R,4R,5R,6R**)-2-((benzyloxy)methyl)-6-(2-ethoxy-2,2-diphenylethyl)tetrahydro-2H-pyran-3,4,5-triyl tribenzoate (**5aac**) TLC (Hexane/EtOAc 3:1):  $R_f$  = 0.33.  $^1\text{H}$  NMR ( $\text{CDCl}_3$ , 600 MHz)  $\delta$  8.03 (dd,  $J$  = 8.4, 1.2 Hz, 2 H), 8.01 (dd,  $J$  = 8.4, 1.2 Hz, 2 H), 7.93 (dd,  $J$  = 8.4, 1.2 Hz, 2 H), 7.80 (dd,  $J$  = 8.4, 1.2 Hz, 2 H), 7.57 (pseudo-t,  $J$  = 7.8 Hz, 1 H), 7.54 (pseudo-t,  $J$  = 7.8 Hz, 1 H), 7.50 (pseudo-t,  $J$  = 7.2 Hz, 1 H), 7.45–7.43 (m, 5 H), 7.39–7.31 (m, 8 H), 7.30–7.27 (m, 4 H), 7.24 (pseudo-t,  $J$  = 7.2 Hz, 1 H), 7.19 (pseudo-t,  $J$  = 7.2 Hz, 1 H), 6.02 (pseudo-t,  $J$  = 9.0 Hz, 1 H), 5.82 (dd,  $J$  = 9.6, 3.0 Hz, 1 H), 5.46 (pseudo-t,  $J$  = 3.0 Hz, 1 H), 4.51–4.49 (m, 1 H), 4.18 (dd,  $J$  = 12.0, 3.6 Hz, 1 H), 4.02–3.97 (m, 2 H), 3.28–3.20 (m, 2 H), 3.01 (dd,  $J$  = 14.4, 1.2 Hz, 1 H), 2.86 (dd,  $J$  = 14.4, 4.2 Hz, 1 H), 1.20 (t,  $J$  = 6.6 Hz, 3 H);  $^{13}\text{C}$  NMR ( $\text{CDCl}_3$ , 150 MHz)  $\delta$  166.1, 165.7, 165.28, 165.25, 145.2, 144.6, 133.3, 133.24, 133.19, 132.9, 129.9, 129.8, 129.72, 129.68, 129.6, 129.1, 128.9, 128.43, 128.37, 128.32, 128.30, 128.2, 128.0, 127.2, 127.0, 126.7, 126.6, 80.8, 72.6, 72.0, 70.5, 70.4, 67.5, 62.9, 58.2, 34.7, 15.3; HRMS (ESI)  $m/z$  calc for  $\text{C}_{50}\text{H}_{44}\text{KO}_{10}$   $[\text{M}+\text{K}]^+$  843.2566; found 843.2537.

### 2-2-4. Three-component coupling reaction between **1a**, **2d** and water

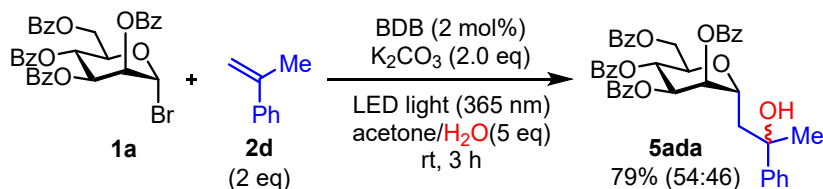

Glycosyl bromide **1a** (0.20 mmol, 132 mg), organic photocatalytic BDB (0.004 mmol, 1.7 mg), and potassium carbonate (0.40 mmol, 55.3 mg) were added to the dried Schrenk tube under argon. Dry

MeCN (2.0 mL),  $\alpha$ -methylstyrene (**2d**) (0.4 mmol, 52  $\mu$ L) and water (1.0 mmol, 18  $\mu$ L) were added and stirred. Then the LED ramp was attached to the Schrenk tube using a Teflon joint, and freeze degassing were performed using liquid nitrogen. The reaction was performed by irradiating LED light (wavelength: 365 nm) for 3 h in water bath. After photo irradiation the reaction mixture was diluted with  $\text{CHCl}_3$ , concentrated under vacuum. Tetrachloroethane was added as an internal standard and  $^1\text{H}$  NMR measurement was performed to determine NMR yield of **5ada** (79%, major/minor = 54:46). Isomers of **5ada** was isolated by silica gel column (eluent: Hexane/EtOAc = 4:1) and preparative TLC (eluent: Hexane/EtOAc = 2:1). **(2R,3R,4R,5R,6R)-2-((benzoyloxy)methyl)-6-(2-hydroxy-2-phenylpropyl)tetrahydro-2H-pyran-3,4,5-triyl tribenzoate (5ada)** major isomer: TLC (Hexane/EtOAc 3:1):  $R_f$  = 0.33.  $^1\text{H}$  NMR ( $\text{CDCl}_3$ , 600 MHz)  $\delta$  8.14 (d,  $J$  = 7.8 Hz, 2 H), 8.03 (d,  $J$  = 8.4 Hz, 2 H), 7.92 (d,  $J$  = 7.8 Hz, 2 H), 7.77 (d,  $J$  = 7.8 Hz, 2 H), 7.61–7.55 (m, 3 H), 7.52–7.46 (m, 3 H), 7.43–7.41 (m, 4 H), 7.38 (*pseudo*-t,  $J$  = 7.8 Hz, 2 H), 7.34–7.31 (m, 4 H), 7.27–7.25 (m, 1 H), 5.80 (dd,  $J$  = 8.4, 3.0 Hz, 1 H), 5.78 (*pseudo*-t,  $J$  = 8.4 Hz, 1 H), 5.57 (dd,  $J$  = 4.2, 3.0 Hz, 1 H), 4.59 (dd,  $J$  = 10.8, 6.0 Hz, 1 H), 4.52–4.47 (m, 2 H), 4.25 (dd,  $J$  = 9.6, 3.0 Hz, 1 H), 3.72 (s, 1 H), 2.58 (dd,  $J$  = 15.0, 11.4 Hz, 1 H), 2.32 (d,  $J$  = 14.4 Hz, 1 H), 1.60 (s, 3 H);  $^{13}\text{C}$  NMR ( $\text{CDCl}_3$ , 150 MHz)  $\delta$  166.1, 165.4, 165.27, 165.25, 146.8, 133.6, 133.4, 133.2, 129.9, 129.8, 129.73, 129.67, 129.6, 129.2, 128.82, 128.78, 128.53, 128.51, 128.48, 128.47, 126.8, 124.7, 75.1, 72.1, 71.7, 71.0, 69.2, 67.9, 62.8, 40.8, 31.6; HRMS (ESI)  $m/z$  calc for  $\text{C}_{43}\text{H}_{38}\text{KO}_{10}$   $[\text{M}+\text{K}]^+$  753.2097; found 753.2086.

**5ada** minor isomer: TLC (Hexane/EtOAc 3:1):  $R_f$  = 0.27.  $^1\text{H}$  NMR ( $\text{CDCl}_3$ , 600 MHz)  $\delta$  8.11 (d,  $J$  = 7.2 Hz, 2H), 8.04 (d,  $J$  = 7.8 Hz, 2H), 7.96 (d,  $J$  = 7.8 Hz, 2H), 7.85 (d,  $J$  = 7.8 Hz, 2H), 7.60–7.56 (m, 2H), 7.54–7.51 (m, 2H), 7.47–7.36 (m, 9H), 7.31–7.26 (m, 3H), 6.00 (*pseudo*-t,  $J$  = 9.0 Hz, 1H), 5.79 (dd,  $J$  = 9.6, 3.6 Hz, 1H), 5.68 (s, 1H), 4.61 (dt,  $J$  = 9.6, 3.6 Hz, 1H), 4.50–4.42 (m, 2H), 4.37 (ddd,  $J$  = 9.0, 5.4, 3.0 Hz, 1H), 3.01 (s, 1H), 2.60 (dd,  $J$  = 15.0, 10.2 Hz, 1H), 2.22 (dd,  $J$  = 14.4, 3.0 Hz, 1H), 1.72 (s, 3H);  $^{13}\text{C}$  NMR ( $\text{CDCl}_3$ , 150 MHz)  $\delta$  166.2, 165.6, 165.3, 165.25, 147.3, 133.5, 133.4, 133.3, 133.1, 129.80, 129.78, 129.76, 129.71, 129.68, 129.4, 128.9, 128.5, 128.51, 128.44, 128.41, 128.37, 128.35, 126.9, 124.5, 73.7, 73.3, 72.4, 70.8, 69.9, 67.4, 63.0, 41.6, 29.8; HRMS (ESI)  $m/z$  calc for  $\text{C}_{43}\text{H}_{38}\text{KO}_{10}$   $[\text{M}+\text{K}]^+$  753.2097; found 753.2082.

#### 2-2-5. Three-component coupling reaction between **1a**, **2b** and water

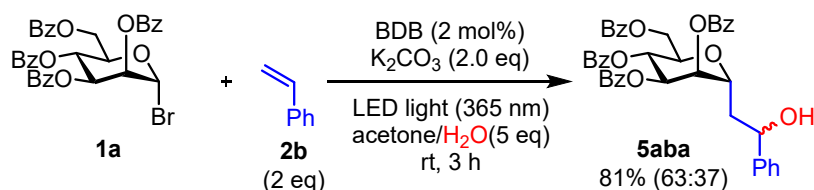

Glycosyl bromide **1a** (0.20 mmol, 132 mg), organic photocatalytic BDB (0.004 mmol, 1.7 mg), and potassium carbonate (0.40 mmol, 55.3 mg) were added to the dried Schrenk tube under argon. Dry

MeCN (2.0 mL), styrene (**2b**) (0.4 mmol, 46  $\mu$ L) and water (1.0 mmol, 18  $\mu$ L) were added and stirred. Then the LED ramp was attached to the Schrenk tube using a Teflon joint, and freeze degassing were performed using liquid nitrogen. The reaction was performed by irradiating LED light (wavelength: 365 nm) for 3 h in water bath. After photo irradiation the reaction mixture was diluted with  $\text{CHCl}_3$ , concentrated under vacuum. Tetrachloroethane was added as an internal standard and  $^1\text{H}$  NMR measurement was performed to determine NMR yield of **5aba** (56%, major/minor = 63:37). **5aba** was isolated by silica gel column (eluent: Hexane/EtOAc = 3:1) and preparative GPC (eluent:  $\text{CHCl}_3$ ). **(2R,3R,4R,5R,6R)-2-((benzoyloxy)methyl)-6-(2-hydroxy-2-phenylethyl)tetrahydro-2H-pyran-3,4,5-triyl tribenzoate (5aba)** major isomer: TLC (Hexane/EtOAc 3:1):  $R_f$  = 0.23.  $^1\text{H}$  NMR ( $\text{CDCl}_3$ , 600 MHz)  $\delta$  8.11 (dd,  $J$  = 8.4, 1.2 Hz, 2 H), 8.02–8.00 (m, 4 H), 7.91 (dd,  $J$  = 8.4, 1.2 Hz, 2 H), 7.60–7.49 (m, 4 H), 7.45–7.38 (m, 6 H), 7.37–7.32 (m, 6 H), 7.31–7.26 (m, 1 H), 5.86 (*pseudo-t*,  $J$  = 7.2 Hz, 1 H), 5.82 (dd,  $J$  = 7.8 Hz, 1 H), 5.69 (dd,  $J$  = 10.2, 3.0 Hz, 1 H), 4.95–4.91 (m, 2 H), 4.72 (dt,  $J$  = 10.8, 4.2 Hz, 1 H), 4.52 (dd,  $J$  = 12.0, 3.0 Hz, 1 H), 4.41 (td,  $J$  = 6.6, 3.0 Hz, 1 H), 2.79 (d,  $J$  = 3.6 Hz, 1 H), 2.28 (ddd,  $J$  = 13.2, 10.8, 2.4 Hz, 1 H), 2.17 (ddd,  $J$  = 14.4, 9.6, 3.6 Hz, 1 H);  $^{13}\text{C}$  NMR ( $\text{CDCl}_3$ , 150 MHz)  $\delta$  166.6, 165.5, 165.43, 165.38, 143.9, 133.6, 133.42, 133.35, 133.3, 129.9, 129.81, 129.75, 129.73, 129.6, 129.4, 128.9, 128.6, 128.5, 127.7, 125.6, 72.0, 71.3, 70.8, 69.9, 69.4, 68.2, 62.6, 38.8; HRMS (ESI)  $m/z$  calc for  $\text{C}_{42}\text{H}_{36}\text{KO}_{10}$   $[\text{M}+\text{K}]^+$  739.1940; found 739.1935.

**5aba** minor isomer: TLC (Hexane/EtOAc 3:1):  $R_f$  = 0.17.  $^1\text{H}$  NMR ( $\text{CDCl}_3$ , 600 MHz)  $\delta$  8.12 (dd,  $J$  = 8.4, 1.2 Hz, 2 H), 8.01 (dd,  $J$  = 8.4, 1.2 Hz, 2 H), 8.00 (dd,  $J$  = 8.4, 1.2 Hz, 2 H), 7.86 (dd,  $J$  = 8.4, 1.2 Hz, 2 H), 7.60–7.53 (m, 3 H), 7.49–7.47 (m, 1 H), 7.44–7.36 (m, 10 H), 7.33–7.29 (m, 3 H), 5.96 (*pseudo-t*,  $J$  = 9.0 Hz, 1 H), 5.81 (dd,  $J$  = 9.0, 3.0 Hz, 1 H), 5.66 (*pseudo-t*,  $J$  = 3.0 Hz, 1 H), 5.05–5.02 (m, 1 H), 4.69 (dd,  $J$  = 12.0, 6.0 Hz, 1 H), 4.63 (dd,  $J$  = 12.0, 2.4 Hz, 1 H), 4.55 (ddd,  $J$  = 9.0, 6.6, 3.0 Hz, 1 H), 4.50 (dt,  $J$  = 10.8, 3.6 Hz, 1 H), 2.94 (d,  $J$  = 1.8 Hz, 1 H), 2.56 (ddd,  $J$  = 14.4, 4.8, 2.4 Hz, 1 H), 2.14 (dt,  $J$  = 14.4, 4.2 Hz, 1 H);  $^{13}\text{C}$  NMR ( $\text{CDCl}_3$ , 150 MHz)  $\delta$  166.3, 165.54, 165.51, 165.37, 143.21, 133.6, 133.43, 133.38, 133.17, 129.83, 129.79, 129.74, 129.72, 129.6, 129.3, 128.8, 128.6, 128.53, 128.50, 128.48, 128.42, 127.9, 125.8, 74.4, 73.0, 71.5, 71.2, 69.7, 67.6, 63.0, 37.9; HRMS (ESI)  $m/z$  calc for  $\text{C}_{42}\text{H}_{36}\text{KO}_{10}$   $[\text{M}+\text{K}]^+$  739.1940; found 739.1949.

#### 2-2-6. Three-component coupling reaction between **1b**, **2b** and water

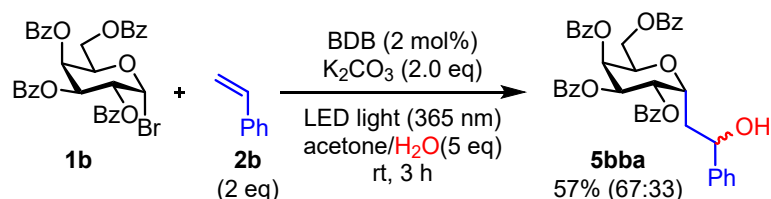

Glycosyl bromide **1b** (0.20 mmol, 132 mg), organic photocatalytic BDB (0.004 mmol, 1.7 mg), and

potassium carbonate (0.40 mmol, 55.3 mg) were added to the dried Schrenk tube under argon. Dry acetone (2.0 mL), styrene (**2b**) (0.4 mmol, 46  $\mu$ L) and water (1.0 mmol, 18  $\mu$ L) were added and stirred. Then the LED ramp was attached to the Schrenk tube using a Teflon joint, and freeze degassing were performed using liquid nitrogen. The reaction was performed by irradiating LED light (wavelength: 365 nm) for 3 h in water bath. After photo irradiation the reaction mixture was diluted with  $\text{CHCl}_3$ , concentrated under vacuum. Tetrachloroethane was added as an internal standard and  $^1\text{H}$  NMR measurement was performed to determine NMR yield of **5bba** (57%, major/minor = 67:33). **5bba** was isolated by silica gel column (eluent: Hexane/EtOAc = 3:1) and preparative GPC (eluent:  $\text{CHCl}_3$ ).

**(2R,3S,4R,5S,6R)-2-((benzoyloxy)methyl)-6-(2-hydroxy-2-phenylethyl)tetrahydro-2H-pyran-3,4,5-triyl tribenzoate (5bba)** major isomer : TLC (Hexane/EtOAc 3:1):  $R_f$  = 0.27.  $^1\text{H}$  NMR ( $\text{CDCl}_3$ , 600 MHz)  $\delta$  8.09 (dd,  $J$  = 8.4, 1.2 Hz, 2 H), 8.04–7.96 (m, 6 H), 7.61–7.54 (m, 4 H), 7.46–7.39 (m, 8 H), 7.31–7.28 (m, 4 H), 7.25–7.22 (m, 1 H), 5.96 (*pseudo*-t,  $J$  = 4.2 Hz, 1 H), 5.80 (dd,  $J$  = 7.2, 3.6 Hz, 1 H), 5.69 (dd,  $J$  = 6.6, 3.6 Hz, 1 H), 5.28 (s, 1 H), 4.93 (dt,  $J$  = 10.8, 2.4 Hz, 1 H), 4.88–4.83 (m, 1 H), 4.70–4.65 (m, 1 H), 4.36 (dd,  $J$  = 12.0, 3.0 Hz, 1 H), 3.19 (s, 1 H), 2.17 (ddd,  $J$  = 13.8, 10.8, 2.4 Hz, 1 H), 1.99–1.93 (m, 1 H);  $^{13}\text{C}$  NMR ( $\text{CDCl}_3$ , 150 MHz)  $\delta$  167.0, 165.3, 165.23, 165.20, 144.1, 133.6, 133.5, 133.46, 129.84, 129.83, 129.75, 129.73, 129.4, 128.94, 128.91, 128.59, 128.57, 128.54, 128.5, 128.48, 127.43, 125.5, 70.9, 70.1, 69.6, 68.5, 67.8, 67.4, 61.5, 37.5; HRMS (ESI)  $m/z$  calc for  $\text{C}_{42}\text{H}_{36}\text{KO}_{10}$   $[\text{M}+\text{K}]^+$  739.1940; found 739.1915.

**5bba** minor isomer : TLC (Hexane/EtOAc 3:1):  $R_f$  = 0.22.  $^1\text{H}$  NMR ( $\text{CDCl}_3$ , 600 MHz)  $\delta$  8.09 (d,  $J$  = 7.2 Hz, 2 H), 8.01 (d,  $J$  = 7.2 Hz, 2 H), 7.99 (d,  $J$  = 7.8 Hz, 2 H), 7.78 (d,  $J$  = 7.8 Hz, 2 H), 7.60 (t,  $J$  = 7.8 Hz, 1 H), 7.55 (d,  $J$  = 7.8 Hz, 2 H), 7.51 (t,  $J$  = 7.2 Hz, 1 H), 7.47–7.39 (m, 6 H), 7.36–7.25 (m, 7 H), 6.00 (m, 1 H), 5.81 (dd,  $J$  = 8.0, 3.4 Hz, 1 H), 5.74 (dd,  $J$  = 8.0, 4.8 Hz, 1 H), 4.97 (*pseudo*-t,  $J$  = 6.0 Hz, 1 H), 4.90–4.84 (m, 1 H), 4.80–4.75 (m, 1 H), 4.68 (dd,  $J$  = 11.4, 3.6 Hz, 1 H), 4.48 (dd,  $J$  = 12.0, 3.6 Hz, 1 H), 2.95 (s, 1 H), 2.49–2.42 (m, 1 H), 1.99 (dd,  $J$  = 15.0, 3.0 Hz, 1 H);  $^{13}\text{C}$  NMR ( $\text{CDCl}_3$ , 150 MHz)  $\delta$  166.4, 165.4, 165.53, 165.33, 165.32, 143.37, 133.61, 133.59, 133.4, 133.3, 129.9, 129.8, 128.92, 128.88, 128.83, 128.61, 128.55, 128.49, 128.46, 127.8, 125.8, 73.1, 71.5, 69.9, 69.3, 68.6, 68.1, 62.2, 35.9; HRMS (ESI)  $m/z$  calc for  $\text{C}_{42}\text{H}_{36}\text{KO}_{10}$   $[\text{M}+\text{K}]^+$  739.1940; found 739.1920.

#### 2-2-7. Three-component coupling reaction between **1c**, **2b** and water

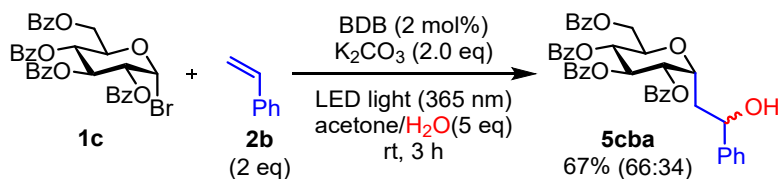

Glycosyl bromide **1c** (0.20 mmol, 132 mg), organic photocatalytic BDB (0.02 mmol, 8.3 mg), and potassium carbonate (0.40 mmol, 55.3 mg) were added to the dried Schrenk tube under argon. Dry

MeCN (2.0 mL), styrene (**2b**) (0.4 mmol, 46  $\mu$ L) and water (1.0 mmol, 18  $\mu$ L) were added and stirred. Then the LED ramp was attached to the Schrenk tube using a Teflon joint, and freeze degassing were performed using liquid nitrogen. The reaction was performed by irradiating LED light (wavelength: 365 nm) for 3 h in water bath. After photo irradiation the reaction mixture was diluted with  $\text{CHCl}_3$ , concentrated under vacuum. Tetrachloroethane was added as an internal standard and  $^1\text{H}$  NMR measurement was performed to determine NMR yield of **5cba** (67%, major/minor = 66:34). **5cba** was isolated by silica gel column (eluent: Hexane/EtOAc = 3:1) and preparative GPC (eluent:  $\text{CHCl}_3$ ).

**(2R,3R,4R,5S,6R)-2-((benzoyloxy)methyl)-6-(2-hydroxy-2-phenylethyl)tetrahydro-2H-pyran-3,4,5-triyl tribenzoate (5cba)** major isomer: TLC (Hexane/EtOAc 3:1):  $R_f$  = 0.25.  $^1\text{H}$  NMR ( $\text{CDCl}_3$ , 600 MHz)  $\delta$  8.09 (d,  $J$  = 7.8 Hz, 2 H), 8.02 (d,  $J$  = 7.8 Hz, 2 H), 7.97 (d,  $J$  = 7.2 Hz, 2 H), 7.90 (d,  $J$  = 7.8 Hz, 2 H), 7.59–7.51 (m, 3 H), 7.48 (t,  $J$  = 7.2 Hz, 1 H), 7.45–7.36 (m, 6 H), 7.33–7.28 (m, 4 H), 7.27–7.24 (m, 3 H), 5.84 (*pseudo*-t,  $J$  = 6.6 Hz, 1 H), 5.48–5.44 (m, 2 H), 4.98 (dd,  $J$  = 12.0, 7.8 Hz, 1 H), 4.90–4.85 (m, 2 H), 4.50–4.46 (m, 1 H), 4.44 (dd,  $J$  = 12.0, 3.0 Hz, 1 H), 2.81 (d,  $J$  = 3.0 Hz, 1 H), 2.34–2.28 (m, 1 H), 2.04–1.97 (m, 1 H);  $^{13}\text{C}$  NMR ( $\text{CDCl}_3$ , 150 MHz)  $\delta$  166.7, 165.4, 165.3, 165.1, 144.1, 133.5, 133.4, 129.93, 129.85, 129.93, 129.85, 129.76, 129.73, 129.4, 129.1, 128.81, 128.78, 128.54, 128.51, 128.4, 128.3, 127.6, 125.6, 71.8, 70.1, 69.6, 69.2, 68.5, 67.8, 62.4, 37.2; HRMS (ESI)  $m/z$  calc for  $\text{C}_{42}\text{H}_{36}\text{KO}_{10}$   $[\text{M}+\text{K}]^+$  739.1940; found 739.1925.

**5cba** minor isomer: TLC (Hexane/EtOAc 3:1):  $R_f$  = 0.20.  $^1\text{H}$  NMR ( $\text{CDCl}_3$ , 600 MHz)  $\delta$  8.10 (d,  $J$  = 7.8 Hz, 2 H), 7.97 (d,  $J$  = 8.4 Hz, 2 H), 7.93 (d,  $J$  = 8.4 Hz, 2 H), 7.91 (d,  $J$  = 8.4 Hz, 2 H), 7.56–7.47 (m, 4 H), 7.43 (t,  $J$  = 7.8 Hz, 2 H), 7.40–7.29 (m, 10 H), 7.28–7.24 (m, 1 H), 5.92 (*pseudo*-t,  $J$  = 7.8 Hz, 1 H), 5.53 (*pseudo*-t,  $J$  = 7.2 Hz, 1 H), 5.45 (dd,  $J$  = 7.8, 4.8 Hz, 1 H), 4.96 (dd,  $J$  = 7.8, 5.4 Hz, 1 H), 4.69 (dd,  $J$  = 12.0, 7.2 Hz, 1 H), 4.66–4.55 (m, 3 H), 2.91 (s, 1 H), 2.59–2.51 (m, 1 H), 2.03–1.98 (m, 1 H);  $^{13}\text{C}$  NMR ( $\text{CDCl}_3$ , 150 MHz)  $\delta$  166.3, 165.4, 165.3, 165.25, 143.4, 133.54, 133.48, 133.4, 133.2, 129.9, 129.8, 129.5, 128.82, 128.78, 128.6, 128.51, 128.47, 128.44, 128.39, 127.8, 125.8, 73.2, 71.7, 70.8, 70.3, 69.7, 68.9, 62.9, 35.9; HRMS (ESI)  $m/z$  calc for  $\text{C}_{42}\text{H}_{36}\text{KO}_{10}$   $[\text{M}+\text{K}]^+$  739.1940; found 739.1920.

#### 2-3-1. Four-component coupling reaction between **1a**, **2b**, acetonitrile, and water

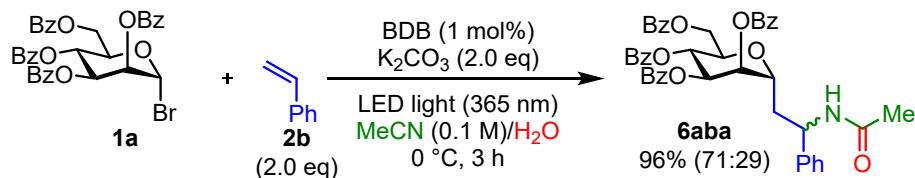

Glycosyl bromide **1a** (0.20 mmol, 132 mg), organic photocatalytic BDB (0.02 mmol, 8.3 mg), and potassium carbonate (0.40 mmol, 55.3 mg) were added to the dried Schrenk tube under argon. Dry MeCN (2.0 mL), styrene (**2b**) (0.4 mmol, 46  $\mu$ L) and water (1.0 mmol, 18  $\mu$ L) were added and stirred. Then the LED ramp was attached to the Schrenk tube using a Teflon joint, and freeze degassing were

performed using liquid nitrogen. The reaction was performed by irradiating LED light (wavelength: 365 nm) for 3 h in ice bath. After photo irradiation the reaction mixture was diluted with CHCl<sub>3</sub>, concentrated under vacuum. Tetrachloroethane was added as an internal standard and <sup>1</sup>H NMR measurement was performed to determine NMR yield of **6aba** (96%, major/minor = 71:29). **6aba** was isolated by silica gel column (eluent: Hexane/EtOAc = 3:1 → 2:1 → 3:2) and preparative GPC (eluent: CHCl<sub>3</sub>). **(2R,3R,4R,5R,6R)-2-(2-acetamido-2-phenylethyl)-6-((benzoyloxy)methyl)tetrahydro-2H-pyran-3,4,5-triyl tribenzoate (6aba)** major isomer: TLC (Hexane/EtOAc 1:1): R<sub>f</sub> = 0.36; <sup>1</sup>H NMR (CDCl<sub>3</sub>, 600 MHz) δ 8.13 (d, *J* = 7.2 Hz, 2 H), 7.99 (dd, *J* = 8.4, 1.8 Hz, 2 H), 7.95 (d, *J* = 7.2 Hz, 2 H), 7.79 (d, *J* = 7.8 Hz, 2 H), 7.59–7.55 (m, 2 H), 7.53 (t, *J* = 7.2 Hz, 1 H), 7.49 (t, *J* = 7.8 Hz, 1 H), 7.44 (t, *J* = 7.8 Hz, 2 H), 7.40–7.27 (m, 11 H), 6.41 (br, 1 H), 5.90 (t, *J* = 7.2 Hz, 1 H), 5.76 (dd, *J* = 8.4, 3.0 Hz, 1 H), 5.64–5.62 (m, 1 H), 5.38–5.33 (m, 1 H), 5.38–5.33 (m, 1 H), 4.58–4.51 (m, 2 H), 4.40–4.32 (m, 2 H), 2.52–2.46 (m, 1 H), 2.29 (ddd, *J* = 14.4, 7.2, 3.0 Hz, 1 H), 1.96 (s, 3 H); <sup>13</sup>C NMR (CDCl<sub>3</sub>, 150 MHz) δ 169.6, 166.1, 165.4, 165.3, 165.2, 141.3, 133.4, 133.33, 133.30, 133.1, 129.65, 129.58, 129.56, 129.1, 128.73, 128.69, 128.41, 128.40, 128.3, 127.4, 126.2, 71.9, 71.2, 69.6, 67.6, 62.7, 50.7, 34.6, 23.2; HRMS (ESI) *m/z* calc for C<sub>44</sub>H<sub>39</sub>KNO<sub>10</sub> [M+K]<sup>+</sup> 780.2206; found 780.2179.

**6aba** minor isomer: TLC (Hexane/EtOAc 1:1): R<sub>f</sub> = 0.30; <sup>1</sup>H NMR (CDCl<sub>3</sub>, 600 MHz) δ 8.18 (d, *J* = 8.4 Hz, 2 H), 7.99 (d, *J* = 7.8 Hz, 2 H), 7.97 (d, *J* = 7.8 Hz, 2 H), 7.82 (d, *J* = 8.4 Hz, 2 H), 7.59–7.49 (m, 3 H), 7.46–7.40 (m, 3 H), 7.40–7.24 (m, 11 H), 6.06 (t, *J* = 9.0 Hz, 1 H), 6.00–5.94 (m, 1 H), 5.81 (dd, *J* = 9.6, 3.0 Hz, 1 H), 5.60 (s, 1 H), 5.23–5.17 (m, 1 H), 4.75–4.67 (m, 2 H), 4.62 (dd, *J* = 12.0, 5.4 Hz, 1 H), 3.93 (d, *J* = 12.0 Hz, 1 H), 2.94 (td, *J* = 14.4, 4.2 Hz, 1 H), 2.11–2.04 (m, 1 H), 2.01 (s, 3 H); <sup>13</sup>C NMR (CDCl<sub>3</sub>, 150 MHz) δ 169.5, 166.2, 165.6, 165.5, 165.4, 139.3, 133.4, 133.3, 133.2, 133.0, 129.9, 129.81, 129.79, 129.73, 129.65, 129.3, 129.1, 128.9, 128.42, 128.37, 128.3, 128.2, 127.1, 72.7, 71.8, 70.44, 70.38, 67.1, 63.2, 51.1, 34.1, 23.3; HRMS (ESI) *m/z* calc for C<sub>44</sub>H<sub>39</sub>KNO<sub>10</sub> [M+K]<sup>+</sup> 780.2206; found 780.2183.

#### 2-3-2. Four-component coupling reaction between **1b**, **2b**, acetonitrile, and water

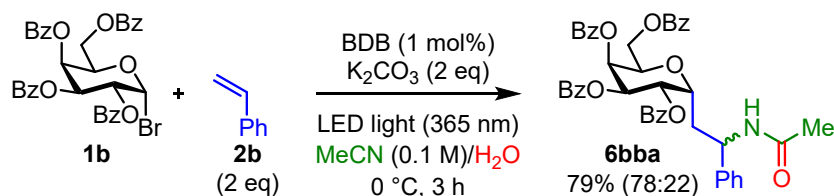

Glycosyl bromide **1b** (0.20 mmol, 132 mg), organic photocatalytic BDB (0.02 mmol, 8.3 mg), and potassium carbonate (0.40 mmol, 55.3 mg) were added to the dried Schrenk tube under argon. Dry MeCN (2.0 mL), styrene (**2b**) (0.4 mmol, 46 μL) and water (1.0 mmol, 18 μL) were added and stirred. Then the LED ramp was attached to the Schrenk tube using a Teflon joint, and freeze degassing were

performed using liquid nitrogen. The reaction was performed by irradiating LED light (wavelength: 365 nm) for 3 h in ice bath. After photo irradiation the reaction mixture was diluted with  $\text{CHCl}_3$ , concentrated under vacuum. Tetrachloroethane was added as an internal standard and  $^1\text{H}$  NMR measurement was performed to determine NMR yield of **6bba** (79%, major/minor = 78:22). **6bba** was isolated by silica gel column (eluent: Hexane/EtOAc = 3:2  $\rightarrow$  5:4) and preparative GPC (eluent:  $\text{CHCl}_3$ ). **(2*R*,3*S*,4*R*,5*S*,6*R*)-2-(2-acetamido-2-phenylethyl)-6-((benzoyloxy)methyl)tetrahydro-2*H*-pyran-3,4,5-triyl tribenzoate (6bba)** major isomer: TLC (Hexane/EtOAc 1:1):  $R_f$  = 0.27;  $^1\text{H}$  NMR ( $\text{CDCl}_3$ , 600 MHz)  $\delta$  8.09 (d,  $J$  = 7.8 Hz, 2 H), 8.05 (d,  $J$  = 7.8 Hz, 2 H), 7.92 (d,  $J$  = 7.8 Hz, 2 H), 7.81 (d,  $J$  = 7.8 Hz, 2 H), 7.62–7.56 (m, 3 H), 7.54 (t,  $J$  = 7.8 Hz, 1 H), 7.49–7.40 (m, 6 H), 7.37 (t,  $J$  = 7.8 Hz, 2 H), 7.31–7.21 (m, 5 H), 6.67 (d,  $J$  = 6.6 Hz, 1 H), 5.95 (s, 1 H), 5.72 (dd,  $J$  = 7.2, 3.0 Hz, 1 H), 5.55–5.48 (m, 1 H), 5.40–5.34 (m, 1 H), 4.73–4.66 (m, 2 H), 4.49 (d,  $J$  = 10.2 Hz, 1 H), 4.47–4.42 (m, 1 H), 2.38–2.31 (m, 1 H), 2.11 (dd,  $J$  = 15.0, 6.6 Hz, 1 H), 1.92 (s, 3 H);  $^{13}\text{C}$  NMR ( $\text{CDCl}_3$ , 150 MHz)  $\delta$  169.2, 166.2, 165.3, 165.2, 165.0, 141.0, 133.6, 133.5, 133.4, 133.3, 129.8, 129.7, 129.57, 129.56, 129.3, 128.70, 128.69, 128.66, 128.6, 128.50, 128.46, 128.4, 127.2, 125.9, 70.6, 70.1, 68.6, 68.4, 67.5, 50.4, 33.4, 23.2; HRMS (ESI)  $m/z$  calc for  $\text{C}_{44}\text{H}_{39}\text{KNO}_{10}$   $[\text{M}+\text{K}]^+$  780.2206; found 780.2190.

**6bba** (minor): TLC (Hexane/EtOAc 1:1):  $R_f$  = 0.20;  $^1\text{H}$  NMR ( $\text{CDCl}_3$ , 600 MHz)  $\delta$  8.13 (d,  $J$  = 7.8 Hz, 2 H), 8.00 (d,  $J$  = 7.8 Hz, 2 H), 7.97 (d,  $J$  = 7.8 Hz, 2 H), 7.81 (d,  $J$  = 7.8 Hz, 2 H), 7.60–7.52 (m, 3 H), 7.49–7.39 (m, 7 H), 7.31–7.25 (m, 5 H), 7.21–7.17 (m, 2 H), 6.00 (s, 1 H), 5.89–5.82 (m, 2 H), 5.73 (dd,  $J$  = 9.0, 5.4 Hz, 1 H), 5.21–5.14 (m, 1 H), 4.90–4.84 (m, 1 H), 4.80 (dd,  $J$  = 11.4, 7.8 Hz, 1 H), 4.39 (dd,  $J$  = 11.4, 4.8 Hz, 1 H), 4.32–4.25 (m, 1 H), 2.75–2.65 (m, 1 H), 2.03–1.94 (m, 4 H);  $^{13}\text{C}$  NMR ( $\text{CDCl}_3$ , 150 MHz)  $\delta$  169.2, 166.3, 165.43, 165.36, 165.3, 139.8, 133.50, 133.49, 133.3, 133.1, 129.87, 129.86, 129.8, 129.7, 129.6, 129.04, 128.96, 128.6, 128.5, 128.4, 128.3, 128.1, 126.9, 69.7, 69.3, 69.2, 68.8, 68.6, 62.6, 51.2, 32.0, 23.3; HRMS (ESI)  $m/z$  calc for  $\text{C}_{44}\text{H}_{39}\text{KNO}_{10}$   $[\text{M}+\text{K}]^+$  780.2206; found 780.2191.

### 2-3-3. Four-component coupling reaction between **1c**, **2b**, acetonitrile, and water

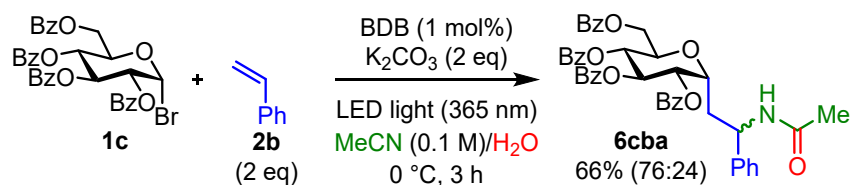

Glycosyl bromide **1c** (0.20 mmol, 132 mg), organic photocatalytic BDB (0.02 mmol, 8.3 mg), and potassium carbonate (0.40 mmol, 55.3 mg) were added to the dried Schrenk tube under argon. Dry MeCN (2.0 mL), styrene (**2b**) (0.4 mmol, 46  $\mu\text{L}$ ) and water (1.0 mmol, 18  $\mu\text{L}$ ) were added and stirred. Then the LED ramp was attached to the Schrenk tube using a Teflon joint, and freeze degassing were

performed using liquid nitrogen. The reaction was performed by irradiating LED light (wavelength: 365 nm) for 3 h in ice bath. After photo irradiation the reaction mixture was diluted with  $\text{CHCl}_3$ , concentrated under vacuum. Tetrachloroethane was added as an internal standard and  $^1\text{H}$  NMR measurement was performed to determine NMR yield of **6cba** (66%, major/minor = 76:24). **6cba** was isolated by silica gel column (eluent: Hexane/EtOAc = 7:4) (**2R,3S,4R,5R,6R**)-2-(2-acetamido-2-phenylethyl)-6-((benzyloxy)methyl)tetrahydro-2H-pyran-3,4,5-triyl tribenzoate (**6cba**) major isomer: TLC (Hexane/EtOAc 1:1):  $R_f$  = 0.23;  $^1\text{H}$  NMR ( $\text{CDCl}_3$ , 600 MHz)  $\delta$  8.10 (dd,  $J$  = 8.4, 1.2 Hz, 2 H), 8.03 (dd,  $J$  = 8.4, 1.2 Hz, 2 H), 7.90 (dd,  $J$  = 8.4, 1.2 Hz, 2 H), 7.83 (dd,  $J$  = 8.4, 1.2 Hz, 2 H), 7.58 (dd,  $J$  = 13.8, 7.8 Hz, 2 H), 7.49 (dd,  $J$  = 13.8, 7.2 Hz, 2 H), 7.46–7.41 (m, 4 H), 7.35 (*pseudo-t*,  $J$  = 7.8 Hz, 2 H), 7.28–7.21 (m, 7 H), 6.45 (d,  $J$  = 8.4 Hz, 1 H), 5.79 (*pseudo-t*,  $J$  = 7.2 Hz, 1 H), 5.30 (dd,  $J$  = 7.2, 4.2 Hz, 1 H), 5.37 (td,  $J$  = 7.8, 3.6 Hz, 1 H), 5.48 (*pseudo-t*,  $J$  = 6.6 Hz, 1 H), 4.55–4.52 (m, 2 H), 4.48 (ddd,  $J$  = 11.4, 5.4 Hz, 1 H), 4.44 (dd,  $J$  = 11.4, 5.4 Hz, 1 H), 2.48 (ddd,  $J$  = 14.4, 10.2, 3.6 Hz, 1 H), 2.31 (ddd,  $J$  = 15.0, 7.2, 1.6 Hz, 1 H), 1.94 (s, 3 H);  $^{13}\text{C}$  NMR ( $\text{CDCl}_3$ , 150 MHz)  $\delta$  169.3, 166.3, 165.3, 165.2, 165.1, 141.0, 133.6, 133.5, 133.4, 133.3, 129.94, 129.86, 129.75, 129.69, 129.5, 128.9, 128.8, 128.7, 128.6, 128.51, 128.46, 128.3, 127.4, 126.1, 71.4, 70.4, 69.3, 68.7, 68.5, 62.6, 50.4, 33.3, 23.4; HRMS (ESI)  $m/z$  calc for  $\text{C}_{44}\text{H}_{39}\text{KNO}_{10}$   $[\text{M}+\text{K}]^+$  780.2206; found 780.2208. **6cba** minor isomer: TLC (Hexane/EtOAc 1:1):  $R_f$  = 0.23;  $^1\text{H}$  NMR ( $\text{CDCl}_3$ , 600 MHz)  $\delta$  8.14 (d,  $J$  = 9.0 Hz, 2 H), 7.96–7.94 (m, 4 H), 7.87 (d,  $J$  = 9.0 Hz, 2 H), 7.59–7.27 (m, 15 H), 7.23–7.20 (m, 2 H), 5.98 (*pseudo-t*,  $J$  = 9.0 Hz, 1 H), 5.81 (d,  $J$  = 7.2 Hz, 1 H), 5.59 (*pseudo-t*,  $J$  = 9.0 Hz, 1 H), 5.41 (dd,  $J$  = 9.6, 5.4 Hz, 1 H), 5.18 (ddd,  $J$  = 11.4, 7.2, 4.8 Hz, 1 H), 4.73 (ddd,  $J$  = 9.0, 6.0, 3.0 Hz, 1 H), 4.64 (dd,  $J$  = 12.0, 6.0 Hz, 1 H), 4.57 (dd,  $J$  = 12.0, 6.0 Hz, 1 H), 4.42 (ddd,  $J$  = 12.0, 6.0, 3.0 Hz, 1 H), 2.82 (ddd,  $J$  = 14.4, 12.0, 4.8 Hz, 1 H), 2.07–2.04 (m, 1 H), 2.02 (s, 3 H);  $^{13}\text{C}$  NMR ( $\text{CDCl}_3$ , 150 MHz)  $\delta$  169.4, 166.3, 165.7, 165.3, 165.1, 139.5, 133.45, 133.37, 133.2, 133.0, 129.91, 129.85, 129.80, 129.75, 129.67, 129.1, 128.9, 128.7, 128.6, 128.5, 128.37, 128.33, 128.31, 128.1, 127.0, 126.0, 70.9, 70.5, 69.9, 69.8, 69.2, 63.2, 51.0, 31.8, 29.7, 23.3; HRMS (ESI)  $m/z$  calc for  $\text{C}_{44}\text{H}_{39}\text{KNO}_{10}$   $[\text{M}+\text{K}]^+$  780.2206; found 780.2182.

#### 2-3-4. Four-component coupling reaction between **1a**, **2b**, propionitrile, and water

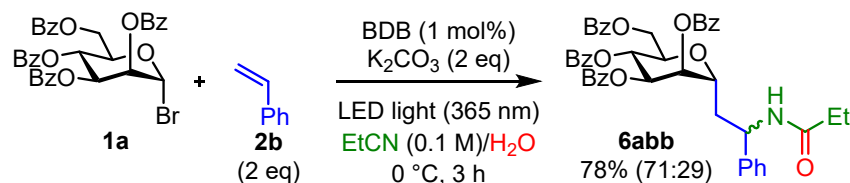

Glycosyl bromide **1a** (0.20 mmol, 132 mg), organic photocatalytic BDB (0.02 mmol, 8.3 mg), and potassium carbonate (0.40 mmol, 55.3 mg) were added to the dried Schrenk tube under argon. Dry propionitrile (2.0 mL), styrene (**2b**) (0.4 mmol, 46  $\mu\text{L}$ ) and water (1.0 mmol, 18  $\mu\text{L}$ ) were added and stirred. Then the LED ramp was attached to the Schrenk tube using a Teflon joint, and freeze degassing

were performed using liquid nitrogen. The reaction was performed by irradiating LED light (wavelength: 365 nm) for 3 h in ice bath. After photo irradiation the reaction mixture was diluted with CHCl<sub>3</sub>, concentrated under vacuum. Tetrachloroethane was added as an internal standard and <sup>1</sup>H NMR measurement was performed to determine NMR yield of **6abb** (78%, major/minor = 71:29). **6abb** was isolated by silica gel column (eluent: Hexane/EtOAc = 1:1) and preparative GPC (eluent: CHCl<sub>3</sub>). **(2R,3R,4R,5R,6R)-2-((benzyloxy)methyl)-6-(2-phenyl-2-propionamidoethyl)tetrahydro-2H-pyran-3,4,5-triyl tribenzoate (6abb)** major isomer: TLC (Hexane/EtOAc 1:1): R<sub>f</sub> = 0.43; <sup>1</sup>H NMR (CDCl<sub>3</sub>, 600 MHz) δ 8.12 (d, *J* = 7.2 Hz, 2 H), 7.99 (d, *J* = 7.2 Hz, 2 H), 7.95 (d, *J* = 7.8 Hz, 2 H), 7.80 (d, *J* = 7.2 Hz, 2 H), 7.61–7.52 (m, 3 H), 7.49 (t, *J* = 7.8 Hz, 1 H), 7.46–7.27 (m, 13 H), 6.30 (d, *J* = 7.2 Hz, 1 H), 5.90 (t, *J* = 7.8 Hz, 1 H), 5.76 (dd, *J* = 8.4, 3.0 Hz, 1 H), 5.64–5.60 (m, 1 H), 5.39–5.33 (m, 1 H), 4.56 (dd, *J* = 12.0, 5.4 Hz, 1 H), 4.51 (dd, *J* = 12.0, 2.4 Hz, 1 H), 4.40–4.31 (m, 2 H), 2.53–2.45 (m, 1 H), 2.29 (ddd, *J* = 14.4, 7.2, 2.4 Hz, 1 H), 2.26–2.14 (m, 2 H), 1.11 (t, *J* = 7.8 Hz, 3 H); <sup>13</sup>C NMR (CDCl<sub>3</sub>, 150 MHz) δ 173.1, 166.2, 165.42, 165.37, 165.3, 141.2, 133.6, 133.4, 133.2, 129.82, 129.75, 129.73, 129.67, 129.2, 128.84, 128.78, 128.5, 128.4, 127.6, 126.3, 71.6, 71.0, 69.5, 67.8, 62.6, 50.7, 34.9, 29.7, 9.7; HRMS (ESI) *m/z* calc for C<sub>45</sub>H<sub>41</sub>KNO<sub>10</sub> [M+K]<sup>+</sup> 794.2362; found 780.2376.

**6abb** minor isomer: TLC (Hexane/EtOAc 1:1): R<sub>f</sub> = 0.42; <sup>1</sup>H NMR (CDCl<sub>3</sub>, 600 MHz) δ 8.18 (d, *J* = 7.8 Hz, 2 H), 7.99 (d, *J* = 7.8 Hz 2 H), 7.97 (d, *J* = 7.8 Hz 2 H), 7.81 (d, *J* = 7.2 Hz, 2 H), 7.59–7.51 (m, 3 H), 7.45–7.27 (m, 14 H), 6.06 (*pseudo*-t, *J* = 9.6 Hz, 1 H), 5.81–5.79 (m, 2 H), 5.59 (*pseudo*-t, *J* = 3.0 Hz, 1 H), 5.20 (ddd, *J* = 10.8, 6.6, 4.2 Hz, 1 H), 4.72 (ddd, *J* = 9.6, 5.4, 3.0 Hz, 1 H), 4.69 (dd, *J* = 12.0 Hz, 2.4 Hz 1 H), 4.62 (dd, *J* = 12.0 Hz, 5.4 Hz 1 H), 3.92–3.89 (dt, *J* = 11.4, 3.0 Hz, 1 H), 3.00–2.95 (m, 1 H), 2.23–2.21 (m, 2 H), 2.06 (ddd, *J* = 12.6, 10.8, 3.0 Hz, 1 H), 1.20 (t, *J* = 7.8 Hz, 3 H); <sup>13</sup>C NMR (CDCl<sub>3</sub>, 150 MHz) δ 173.1, 166.3, 165.7, 165.53, 165.46, 139.4, 129.91, 129.87, 129.8, 129.7, 129.4, 129.2, 128.9, 128.46, 128.42, 128.39, 128.3, 127.2, 72.9, 71.9, 70.52, 70.50, 67.1, 63.3, 51.2, 34.1. 29.7, 9.7; HRMS (ESI) *m/z* calc for C<sub>45</sub>H<sub>41</sub>KNO<sub>10</sub> [M+K]<sup>+</sup> 794.2362; found 794.2340.

#### 2-3-5. Four-component coupling reaction between **1a**, **2e**, acetonitrile, and water

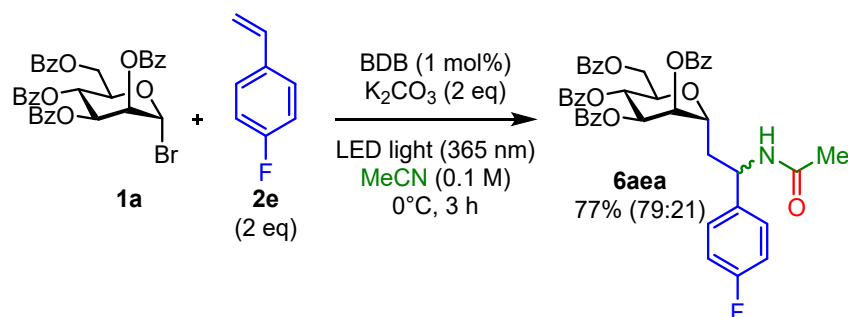

Glycosyl bromide **1a** (0.20 mmol, 132 mg), organic photocatalytic BDB (0.02 mmol, 8.3 mg), and potassium carbonate (0.40 mmol, 55.3 mg) were added to the dried Schrenk tube under argon. Dry

MeCN (2.0 mL) and 4-fluorostyrene (**2e**) (0.4 mmol, 48  $\mu$ L) were added and stirred. Then the LED ramp was attached to the Schrenk tube using a Teflon joint, and freeze degassing were performed using liquid nitrogen. The reaction was performed by irradiating LED light (wavelength: 365 nm) for 3 h in ice bath. After photo irradiation the reaction mixture was diluted with CHCl<sub>3</sub>, concentrated under vacuum. Tetrachloroethane was added as an internal standard and <sup>1</sup>H NMR measurement was performed to determine NMR yield of **6aea** (77%, major/minor = 79:21). **6aea** was isolated by silica gel column (eluent: Hexane/EtOAc = 2:1  $\rightarrow$  3:2  $\rightarrow$  1:1) and preparative GPC (eluent: CHCl<sub>3</sub>). **(2R,3R,4R,5R,6R)-2-(2-acetamido-2-(4-fluorophenyl)ethyl)-6-((benzoyloxy)methyl)tetrahydro-2H-pyran-3,4,5-triyl tribenzoate (6aea)** major isomer: TLC (Hexane/EtOAc 1:1): R<sub>f</sub> = 0.33. <sup>1</sup>H NMR (CDCl<sub>3</sub>, 600 MHz)  $\delta$  8.12 (d, *J* = 7.2 Hz, 2 H), 8.01 (d, *J* = 7.2 Hz, 2 H), 7.93 (d, *J* = 7.2 Hz, 2 H), 7.61–7.53 (m, 3 H), 7.51 (t, *J* = 7.2 Hz, 1 H), 7.46–7.32 (m, 8 H), 7.02 (t, *J* = 8.4 Hz, 1 H), 6.45–6.38 (m, 1 H), 5.86 (t, *J* = 7.2 Hz, 1 H), 5.77 (dd, *J* = 7.8, 3.0 Hz, 1 H), 5.63–5.58 (m, 1 H), 5.36–5.30 (m, 1 H), 4.64 (dd, *J* = 12.0, 6.0 Hz, 1 H), 4.57 (dd, *J* = 12.0, 3.0 Hz, 1 H), 4.42–4.37 (m, 1 H), 4.36–4.31 (m, 1 H), 2.48–2.40 (m, 1 H), 2.25 (ddd, *J* = 15.0, 7.8, 3.0 Hz, 1 H), 1.95 (s, 3 H); <sup>13</sup>C NMR (CDCl<sub>3</sub>, 150 MHz)  $\delta$  169.6, 166.2, 165.4, 165.2, 162.0 (d, *J* = 246.0 Hz), 137.1, 133.49 (d, *J* = 10.5 Hz), 133.47, 133.3, 129.74, 129.69, 129.67, 129.59, 129.55, 129.1, 128.8, 128.7, 128.5, 128.4, 115.6 (d, *J* = 21.0 Hz), 71.6, 71.4, 71.0, 69.5, 67.8, 62.7, 50.1, 34.8, 23.2; <sup>19</sup>F NMR (CDCl<sub>3</sub>, 565 MHz)  $\delta$  46.9 (tt, *J* = 8.5, 5.1 Hz); HRMS (ESI) *m/z* calc for C<sub>44</sub>H<sub>38</sub>FKNO<sub>10</sub> [M+K]<sup>+</sup> 798.2111; found 798.2099. **6aea** minor isomer: TLC (Hexane/EtOAc 1:1): R<sub>f</sub> = 0.23. <sup>1</sup>H NMR (CDCl<sub>3</sub>, 600 MHz)  $\delta$  8.17 (d, *J* = 7.8 Hz, 2 H), 7.99 (d, *J* = 7.8 Hz, 2 H), 7.97 (d, *J* = 7.8 Hz, 2 H), 7.83 (d, *J* = 7.2 Hz, 2 H), 7.60–7.50 (m, 3 H), 7.48–7.41 (m, 3 H), 7.40–7.35 (m, 4 H), 7.31–7.25 (m, 4 H), 7.01 (t, *J* = 8.4 Hz, 2 H), 6.04 (t, *J* = 9.0 Hz, 1 H), 5.91–5.87 (br, 1 H), 5.79 (dd, *J* = 9.6, 3.0 Hz, 1 H), 5.60–5.57 (m, 1 H), 5.21–5.16 (m, 1 H), 4.71–4.61 (m, 3 H), 3.93 (d, *J* = 11.4 Hz, 1 H), 2.94 (td, *J* = 14.4, 4.8 Hz, 1 H), 2.08–2.01 (m, 4 H); <sup>13</sup>C NMR (CDCl<sub>3</sub>, 150 MHz)  $\delta$  169.5, 166.2, 165.6, 165.5, 165.4, 162.3 (d, *J* = 246.0 Hz), 135.25, 133.4 (d, *J* = 9.0 Hz), 133.3, 133.0, 129.87, 129.83, 129.80, 129.74, 129.66, 129.2, 128.85, 128.83, 128.80, 128.5, 128.4, 128.3, 116.0 (d, *J* = 22.5 Hz), 72.5, 71.7, 70.6, 70.32, 67.2, 63.2, 50.5, 34.3, 23.3; <sup>19</sup>F NMR (CDCl<sub>3</sub>, 565 MHz)  $\delta$  48.2 (tt, *J* = 8.5, 5.1 Hz); HRMS (ESI) *m/z* calc for C<sub>44</sub>H<sub>38</sub>FKNO<sub>10</sub> [M+K]<sup>+</sup> 798.2111; found 798.2096.

2-3-6. Four-component coupling reaction between **1a**, **2f**, acetonitrile, and water

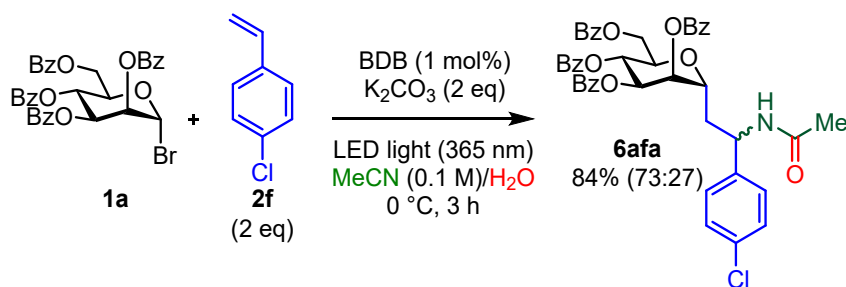

Glycosyl bromide **1a** (0.20 mmol, 132 mg), organic photocatalytic BDB (0.02 mmol, 8.3 mg), and potassium carbonate (0.40 mmol, 55.3 mg) were added to the dried Schrenk tube under argon. Dry acetonitrile (2.0 mL), 4-chlorostyrene (**2f**) (0.4 mmol, 51  $\mu$ L) and water (1.0 mmol, 18  $\mu$ L) were added and stirred. Then the LED ramp was attached to the Schrenk tube using a Teflon joint, and freeze degassing were performed using liquid nitrogen. The reaction was performed by irradiating LED light (wavelength: 365 nm) for 3 h in ice bath. After photo irradiation the reaction mixture was diluted with CHCl<sub>3</sub>, concentrated under vacuum. Tetrachloroethane was added as an internal standard and <sup>1</sup>H NMR measurement was performed to determine NMR yield of **6afa** (84%, major/minor = 73:27). **6afa** was isolated by silica gel column (eluent: Hexane/EtOAc = 2:1→3:2→1:1) and preparative GPC (eluent: CHCl<sub>3</sub>).

**(2R,3R,4R,5R,6R)-2-(2-acetamido-2-(4-chlorophenyl)ethyl)-6-((benzyloxy)methyl)tetrahydro-2H-pyran-3,4,5-triyl tribenzoate (6afa)** major isomer: TLC (Hexane/EtOAc 1:1) R<sub>f</sub> = 0.28. <sup>1</sup>H NMR (CDCl<sub>3</sub>, 600 MHz)  $\delta$  8.12 (d, *J* = 8.4 Hz, 2 H), 7.99 (d, *J* = 7.2 Hz, 2 H), 7.91 (d, *J* = 8.4 Hz, 2 H), 7.83 (d, *J* = 7.8 Hz, 2 H), 7.61–7.49 (m, 4 H), 7.45 (t, *J* = 7.8 Hz, 2 H), 7.42–7.33 (m, 6 H), 7.30 (d, *J* = 8.4 Hz, 2 H), 7.22 (d, *J* = 8.4 Hz, 2 H), 6.58–6.52 (m, 1 H), 5.86 (t, *J* = 7.2 Hz, 1 H), 5.79–5.74 (m, 1 H), 5.62–5.88 (br, 1 H), 5.34–5.28 (m, 1 H), 4.65 (dd, *J* = 12.6, 6.6 Hz, 1 H), 4.57 (dd, *J* = 12.0 Hz, 1 H), 4.43–4.38 (m, 1 H), 4.37–4.31 (m, 1 H), 2.48–2.40 (m, 1 H), 2.24 (ddd, *J* = 15.0, 7.8, 2.4 Hz, 1 H), 1.93 (s, 3 H); <sup>13</sup>C NMR (CDCl<sub>3</sub>, 150 MHz)  $\delta$  169.7, 166.1, 165.39, 165.35, 165.2, 140.0, 133.5, 133.44, 133.42, 133.2, 133.1, 129.67, 129.64, 129.61, 129.52, 129.47, 129.0, 128.76, 128.66, 128.57, 128.45, 128.42, 128.37, 127.6, 71.4, 70.9, 69.5, 67.7, 62.6, 50.0, 34.5, 23.1; HRMS (ESI) *m/z* calc for C<sub>44</sub>H<sub>38</sub>ClKNO<sub>10</sub> [M+K]<sup>+</sup> 814.1816; found 814.1797.

**6afa** minor isomer: TLC (Hexane/EtOAc 1:1) R<sub>f</sub> = 0.16. <sup>1</sup>H NMR (CDCl<sub>3</sub>, 600 MHz)  $\delta$  8.16 (d, *J* = 8.4 Hz, 2 H), 7.99 (d, *J* = 7.8 Hz, 2 H), 7.97 (d, *J* = 8.4 Hz, 2 H), 7.83 (d, *J* = 7.8 Hz, 2 H), 7.60–7.54 (m, 2 H), 7.45 (t, *J* = 7.8 Hz, 1 H), 7.48–7.42 (m, 3 H), 7.40–7.35 (m, 4 H), 7.32–7.27 (m, 4 H), 7.24 (d, *J* = 8.4 Hz, 2 H), 6.03 (t, *J* = 9.0 Hz, 1 H), 5.99 (d, *J* = 6.6 Hz, 1 H), 5.80 (dd, *J* = 9.6, 3.0 Hz, 1 H), 5.59 (s, 1 H), 5.21–5.15 (m, 1 H), 4.71–4.63 (m, 3 H), 3.95 (d, *J* = 11.4 Hz, 1 H), 2.86 (td, *J* = 14.4, 4.2 Hz, 1 H), 2.08–1.99 (m, 4 H); <sup>13</sup>C NMR (CDCl<sub>3</sub>, 150 MHz)  $\delta$  169.5, 166.2, 165.6, 165.5, 165.4, 138.0, 133.9, 133.47, 133.41, 133.3, 133.1, 129.81, 129.79, 129.74, 129.65, 129.23, 129.16, 128.79, 128.76, 128.48, 128.47, 128.42, 128.35, 72.4, 71.6, 70.6, 70.3, 67.1, 63.1, 50.5, 34.2, 23.2; HRMS (ESI) *m/z* calc for C<sub>44</sub>H<sub>38</sub>ClKNO<sub>10</sub> [M+K]<sup>+</sup> 814.1816; found 814.1774.

2-3-7. Four-component coupling reaction between **1a**, **2g**, acetonitrile, and water

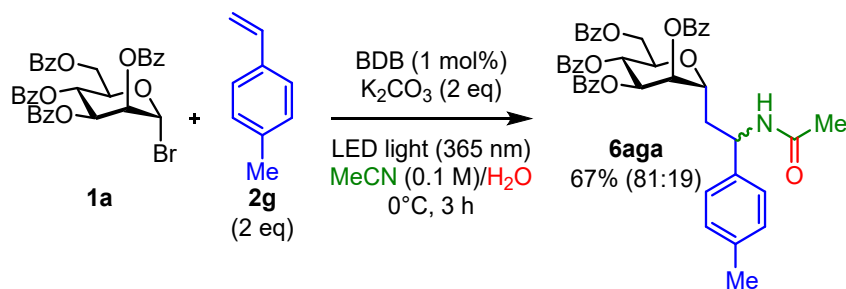

Glycosyl bromide **1a** (0.20 mmol, 132 mg), organic photocatalytic BDB (0.02 mmol, 8.3 mg), and potassium carbonate (0.40 mmol, 55.3 mg) were added to the dried Schrenk tube under argon. Dry acetonitrile (2.0 mL), 4-methylstyrene (**2g**) (0.4 mmol, 54  $\mu$ L) and water (1.0 mmol, 18  $\mu$ L) were added and stirred. Then the LED ramp was attached to the Schrenk tube using a Teflon joint, and freeze degassing were performed using liquid nitrogen. The reaction was performed by irradiating LED light (wavelength: 365 nm) for 3 h in ice bath. After photo irradiation the reaction mixture was diluted with CHCl<sub>3</sub>, concentrated under vacuum. Tetrachloroethane was added as an internal standard and <sup>1</sup>H NMR measurement was performed to determine NMR yield of **6aga** (67%, major/minor = 81:19). **6aga** was isolated by silica gel column (eluent: Hexane/EtOAc = 3:2→1:1) and preparative GPC (eluent: CHCl<sub>3</sub>). **(2R,3R,4R,5R,6R)-2-(2-acetamido-2-(p-tolyl)ethyl)-6-((benzoyloxy)methyl)tetrahydro-2H-pyran-3,4,5-triyl tribenzoate (6aga)** major isomer: TLC (Hexane/EtOAc 1:1) R<sub>f</sub> = 0.32. <sup>1</sup>H NMR (CDCl<sub>3</sub>, 600 MHz)  $\delta$  8.12 (d, *J* = 7.8 Hz, 2 H), 8.00–7.94 (m, 4 H), 7.81 (d, *J* = 7.8 Hz, 2 H), 7.60–7.55 (m, 2 H), 7.53 (t, *J* = 7.2 Hz, 1 H), 7.48 (t, *J* = 7.8 Hz, 1 H), 7.44 (t, *J* = 7.8 Hz, 2 H), 7.41–7.36 (m, 4 H), 7.31 (t, *J* = 7.8 Hz, 2 H), 7.20 (d, *J* = 8.4 Hz, 2 H), 7.15 (d, *J* = 7.8 Hz, 2 H), 6.28 (d, *J* = 7.8 Hz, 1 H), 5.93 (t, *J* = 7.8 Hz, 1 H), 5.76 (dd, *J* = 8.4, 2.4 Hz, 1 H), 5.66–5.62 (m, 1 H), 5.35–5.29 (m, 1 H), 4.58–4.50 (m, 2 H), 4.40–4.35 (m, 1 H), 4.35–4.30 (m, 1 H), 2.54–2.46 (m, 1 H), 2.33 (s, 3 H), 2.28 (ddd, *J* = 14.4, 7.2, 3.0 Hz, 1 H), 1.96 (s, 3 H); <sup>13</sup>C NMR (CDCl<sub>3</sub>, 150 MHz)  $\delta$  169.5, 166.1, 165.41, 165.36, 165.2, 138.3, 137.1, 133.4, 133.31, 133.27, 133.0, 129.7, 129.61, 129.58, 129.4, 129.2, 128.8, 128.7, 128.41, 128.39, 128.33, 128.30, 126.2, 72.2, 71.3, 71.0, 69.7, 67.6, 62.8, 50.4, 34.6, 23.2, 21.0; HRMS (ESI) *m/z* calc for C<sub>45</sub>H<sub>41</sub>KNO<sub>10</sub> [M+K]<sup>+</sup> 794.2362; found 794.2350.

**6aga** minor isomer: TLC (Hexane/EtOAc 1:1) R<sub>f</sub> = 0.19. <sup>1</sup>H NMR (CDCl<sub>3</sub>, 600 MHz)  $\delta$  8.18 (d, *J* = 7.8 Hz, 2 H), 7.98 (t, *J* = 8.4 Hz, 4 H), 7.82 (d, *J* = 7.2 Hz, 2 H), 7.59–7.53 (m, 2 H), 7.51 (t, *J* = 7.2 Hz, 1 H), 7.46–7.41 (m, 3 H), 7.37 (dd, *J* = 17.4, 8.4 Hz, 4 H), 7.29–7.24 (m, 2 H), 7.20 (d, *J* = 7.8 Hz, 2 H), 7.13 (d, *J* = 7.8 Hz, 2 H), 6.07 (t, *J* = 9.6 Hz, 1 H), 5.88 (br, 1 H), 5.80 (dd, *J* = 10.2, 3.0 Hz, 1 H), 5.60 (s, 1 H), 5.20–5.12 (m, 1 H), 4.77–4.67 (m, 2 H), 4.62 (dd, *J* = 12.0, 4.8 Hz, 1 H), 3.92 (d, *J* = 12.0 Hz, 1 H), 3.01–2.91 (m, 1 H), 2.30 (s, 3 H), 2.08–1.98 (m, 4 H); <sup>13</sup>C NMR (CDCl<sub>3</sub>, 150 MHz)  $\delta$  169.4, 166.2, 165.7, 165.5, 165.4, 138.1, 136.2, 133.4, 133.3, 133.2, 132.9, 130.0, 129.9, 129.83, 129.76, 129.7, 129.4, 128.9, 128.43, 128.39, 128.37, 128.3, 127.1, 72.9, 71.9, 70.5, 70.3, 67.1, 63.3, 50.9, 33.9, 23.4, 21.1; HRMS (ESI) *m/z* calc for C<sub>45</sub>H<sub>41</sub>KNO<sub>10</sub> [M+K]<sup>+</sup> 794.2362; found 794.2353.

### 3. Cyclic Voltammetry

Cyclic voltammetry was measured in 0.1 M Bu<sub>4</sub>NPF<sub>6</sub>/CH<sub>3</sub>CN under argon atmosphere at room temperature (ca 25 °C) using glassy carbon (GC) working electrode, platinum wire counter electrode, and standard calomel electrode (SCE) as a reference electrode. Concentrations of glycosyl bromides

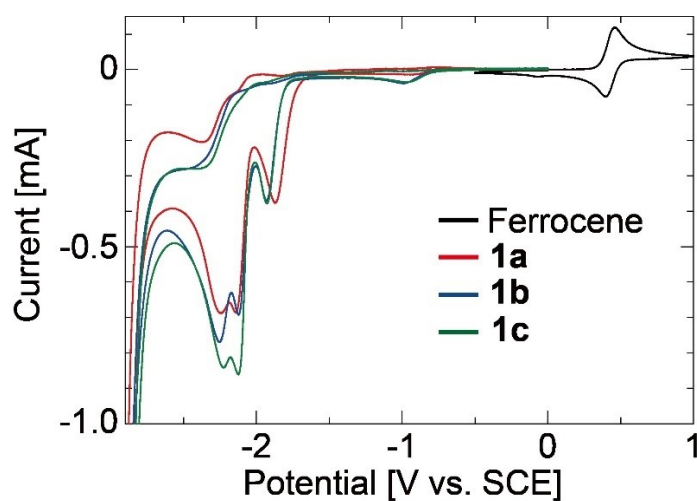

**1a-c** were 10 mM. Reduction potentials ( $E_{\text{red}}$ ) of **1a-c** were determined from the first reduction peaks (**1a**: -1.87 V vs. SCE, **1b**: -1.93 V vs. SCE, **1c**: -1.93 V vs. SCE). Redox potential of ferrocene was obtained using the same electrolyte (0.43 V vs. SCE) and  $E_{\text{red}}$  of **1a-c** were corrected ( $E_{\text{red}}(\text{Fc}/\text{Fc}^+) = E_{\text{red}}(\text{SCE}) - 0.43$ ).

**Figure S1.** Cyclic voltammetry of glycosyl bromides.

#### 4. Stern-Volmer Plots

BDB (4.5 mg, 0.011 mmol) was dissolved in dry acetone (10 mL). Transient absorption spectra were recorded at variable concentrations of glycosyl bromides **1** (0.02-0.01 mM for **1a**, 0.03-0.075 mM for **1b** and **1c**). Quenching rate constants of glycosyl bromides **1** were calculated as follows (mannosyl bromide **1a**:  $3.23 \times 10^{10} \text{ s}^{-1} \text{ mol}^{-1} \text{ L}$ , galactosyl bromide **1b**:  $2.38 \times 10^{10} \text{ s}^{-1} \text{ mol}^{-1} \text{ L}$ , glucosyl bromide **1c**:  $1.0 \times 10^{10} \text{ s}^{-1} \text{ mol}^{-1} \text{ L}$ ).

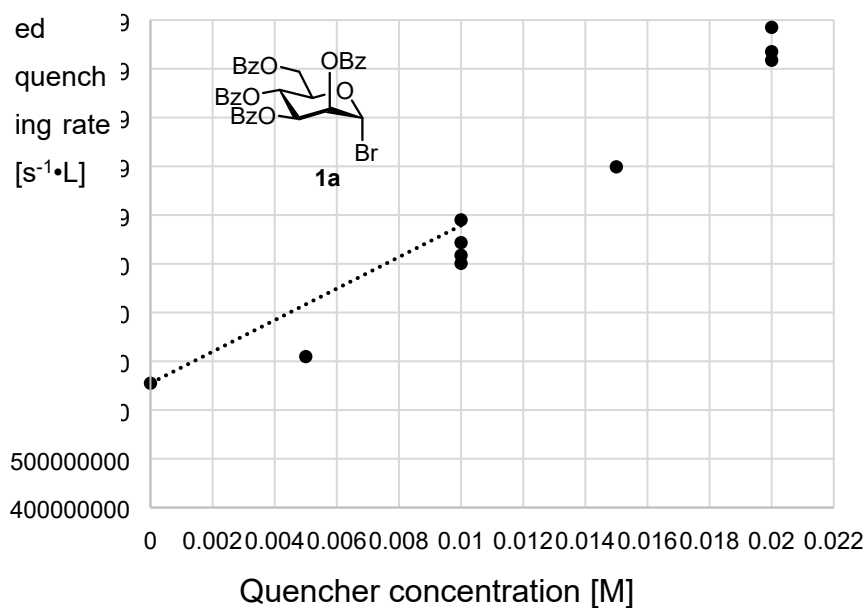

**Figure S2.** Stern-Volmer plot of variable concentrations of mannosyl bromide **1a**.

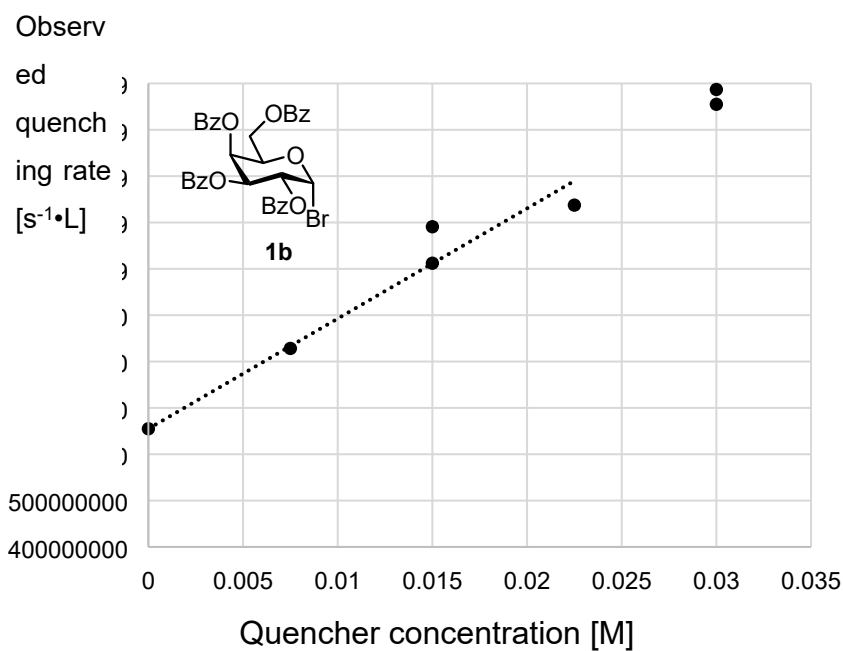

**Figure S3.** Stern-Volmer plot of variable concentrations of galactosyl bromide **1b**.

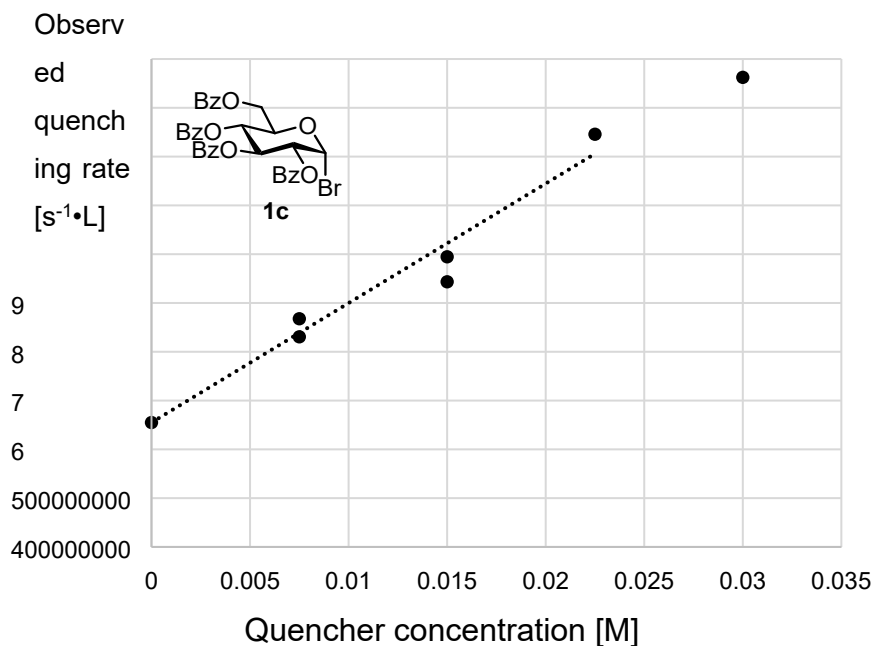

**Figure S4.** Stern-Volmer plot of variable concentrations of glucosyl bromide **1c**.

## 5. Control experiment in the presence of TEMPO

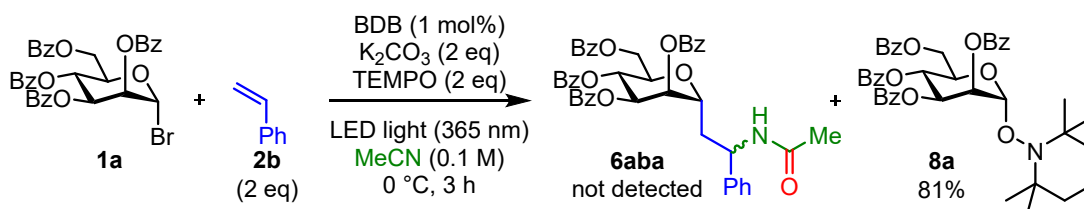

Glycosyl bromide **1a** (0.20 mmol, 132 mg), organic photocatalytic BDB (0.02 mmol, 8.3 mg), and potassium carbonate (0.40 mmol, 55.3 mg) were added to the dried Schrenk tube under argon. Dry MeCN (2.0 mL), styrene (**2b**) (0.4 mmol, 46  $\mu$ L), and 2,2,6,6-tetramethylpiperidine 1-oxyl (TEMPO) (0.4 mmol, 63 mg) were added and stirred. Then the LED ramp was attached to the Schrenk tube using a Teflon joint, and freeze degassing were performed using liquid nitrogen. The reaction was performed by irradiating LED light (wavelength: 365 nm) for 3 h in ice bath. After photo irradiation the reaction mixture was diluted with  $\text{CHCl}_3$ , concentrated under vacuum. Tetrachloroethane was added as an internal standard and  $^1\text{H}$  NMR measurement was performed to determine NMR yield of **8a** (81%). **8a** was isolated by silica gel column (eluent: Hexane/EtOAc = 5:1). **(2R,3R,4S,5S,6R)-2-triyl tribenzoate (8a)** TLC (Hexane/EtOAc 3:1)  $R_f$  = 0.52;  $^1\text{H}$  NMR ( $\text{CDCl}_3$ , 600 MHz)  $\delta$  8.09 (d,  $J$  = 7.8 Hz, 2 H), 8.07 (d,  $J$  = 7.8 Hz, 2 H), 8.00 (d,  $J$  = 7.8 Hz, 2 H), 7.88 (d,  $J$  = 7.8 Hz, 2 H), 7.61–7.54

(m, 2 H), 7.51 (t,  $J = 7.2$  Hz, 1 H), 7.44 (t,  $J = 7.8$  Hz, 1 H), 7.42–7.36 (m, 6 H), 7.29 (t,  $J = 7.8$  Hz, 2 H), 6.20 (t,  $J = 10.2$  Hz, 1 H), 5.99 (s, 1 H), 5.86 (dd,  $J = 10.2, 3.0$  Hz, 1 H), 5.44 (s, 1 H), 4.72–4.67 (m, 1 H), 4.59–4.54 (m, 1 H), 4.49 (dd,  $J = 12.0, 4.8$  Hz, 1 H), 1.67–1.45 (m, 5H), 1.40–1.21 (m, 13 H);  $^{13}\text{C}$  NMR ( $\text{CDCl}_3$ , 150 MHz)  $\delta$  166.2, 165.7, 165.5, 165.4, 133.4, 133.3, 133.2, 133.0, 129.84, 129.80, 129.74, 129.72, 129.1, 129.0, 128.52, 128.39, 128.30, 128.29, 103.2, 70.4, 69.9, 69.7, 66.6, 61.0, 59.8, 40.5, 40.2, 33.67, 33.53, 20.9, 20.3, 17.0; HRMS (ESI)  $m/z$  calc for  $\text{C}_{44}\text{H}_{45}\text{KNO}_{10}$   $[\text{M}+\text{K}]^+$  774.2675; found, 774.2659.

## 6. References

1. L. M. Doyle, S. O'Sullivan, C. Di Sarvo, M. McKinney, P. McArdle, P. V. Murphy, *Org. Lett.* **2017**, *19*, 5802.
2. S. Alazet, F. Le Vaillant, S. Nicolai, T. Courant, J. Waser, *Chem. Eur. J.* **2017**, *40*, 9501.

## 7. $^1\text{H}$ , $^{13}\text{C}$ , and $^{19}\text{F}$ NMR spectra

### $^1\text{H}$ NMR spectra **3aa**

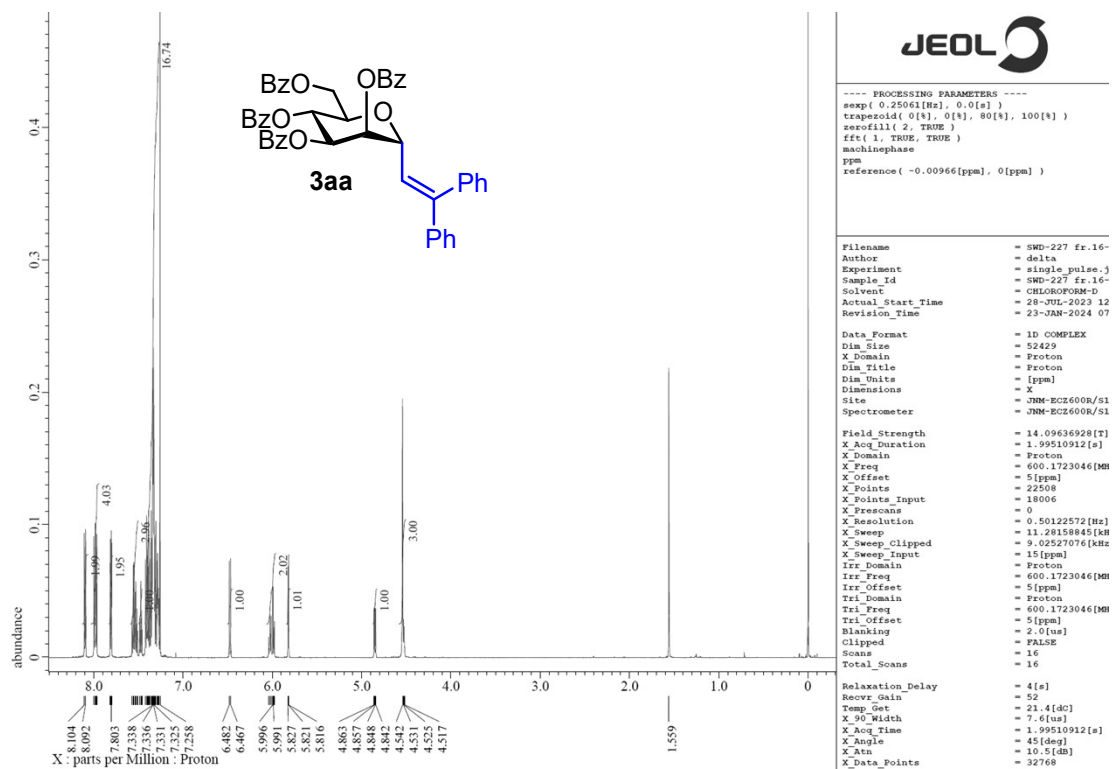

### $^{13}\text{C}$ NMR spectra **3aa**

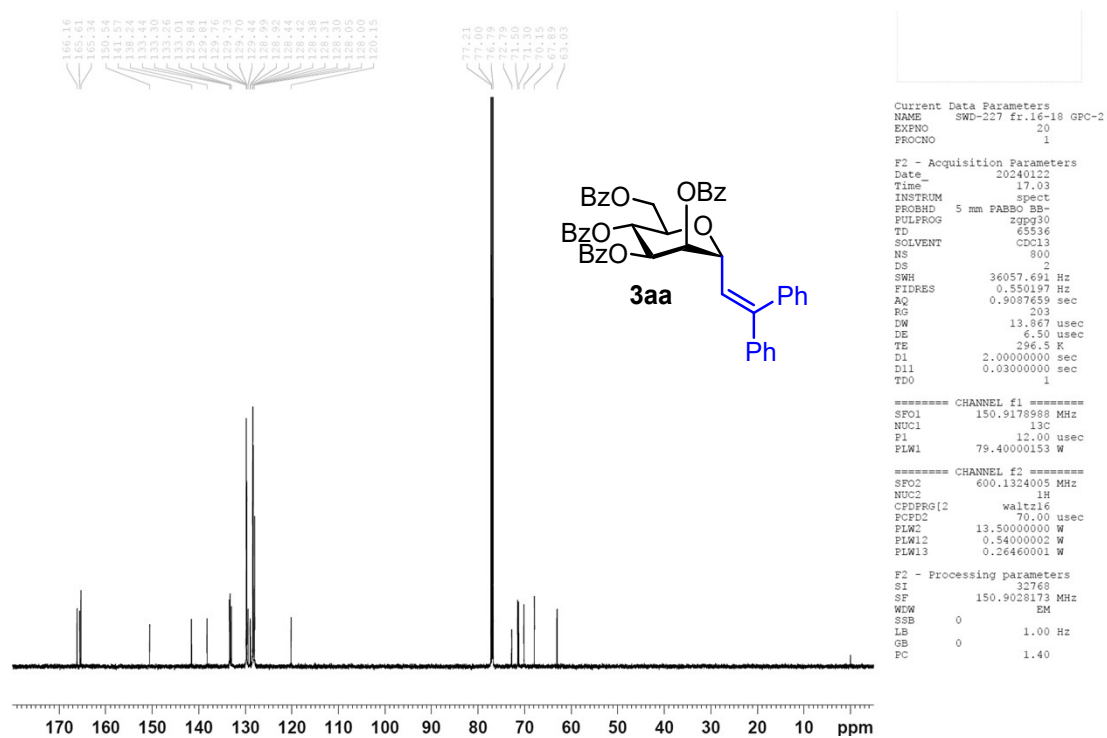

# <sup>1</sup>H NMR spectra **3ac**

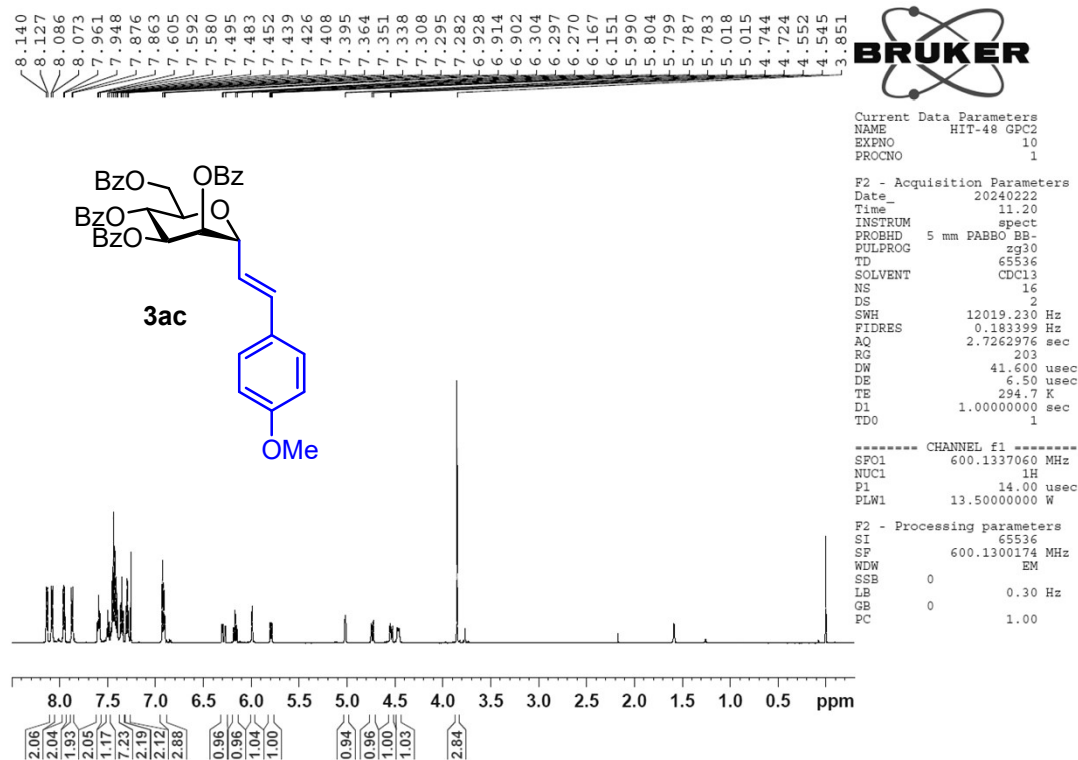

# <sup>13</sup>C NMR spectra **3ac**

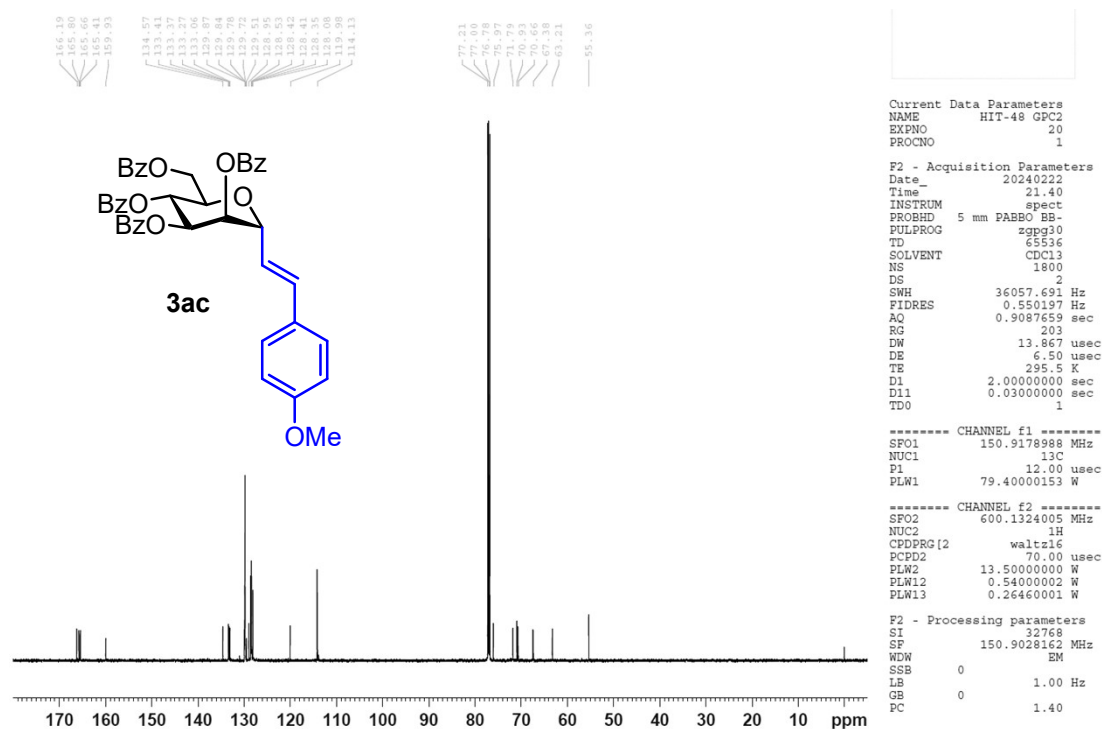

# <sup>1</sup>H NMR spectra **3ba**

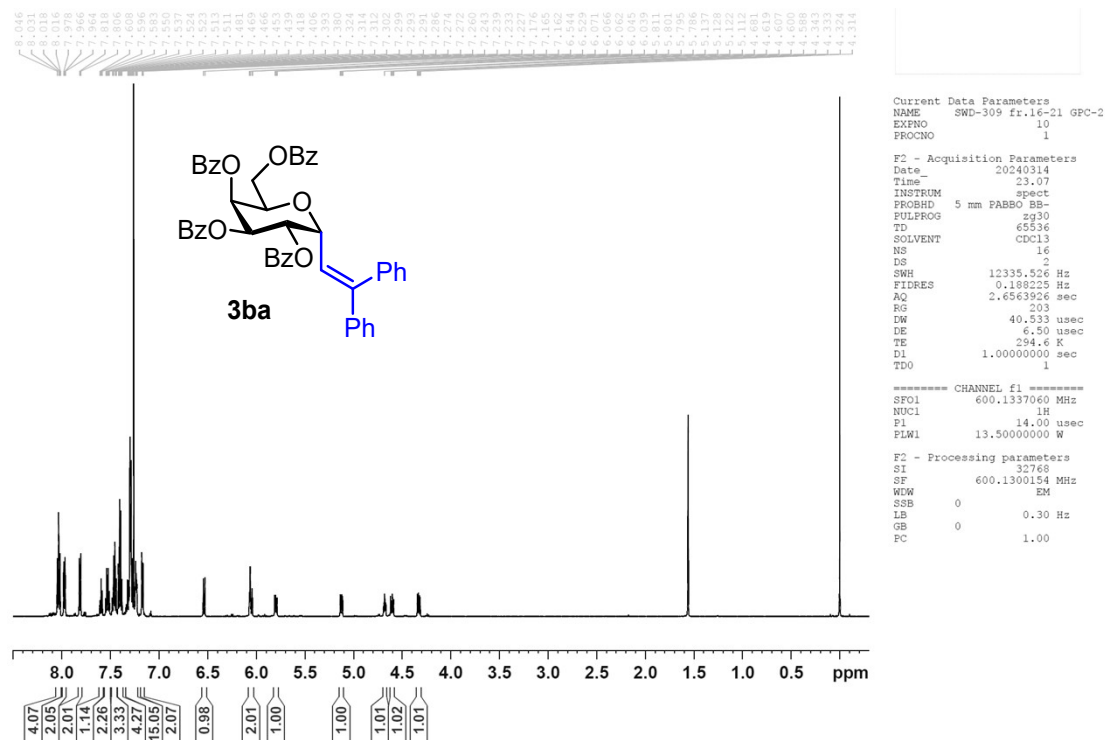

# <sup>13</sup>C NMR spectra **3ba**

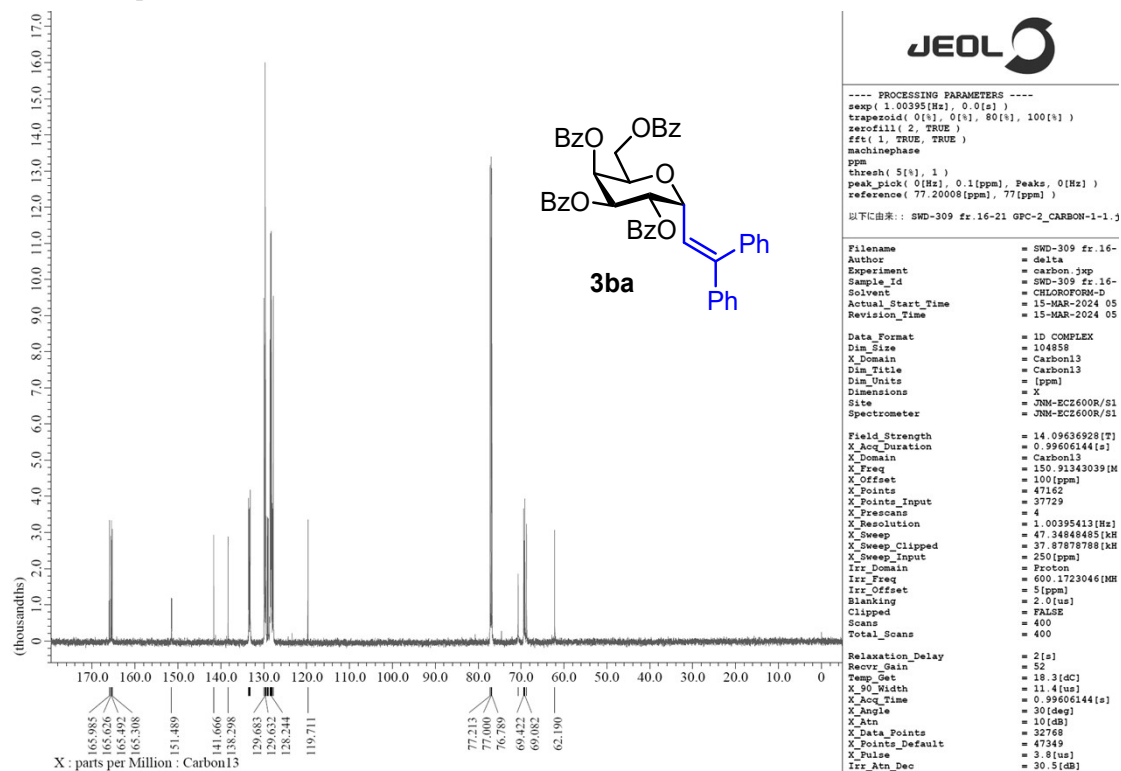

<sup>1</sup>H NMR spectra **3ah**

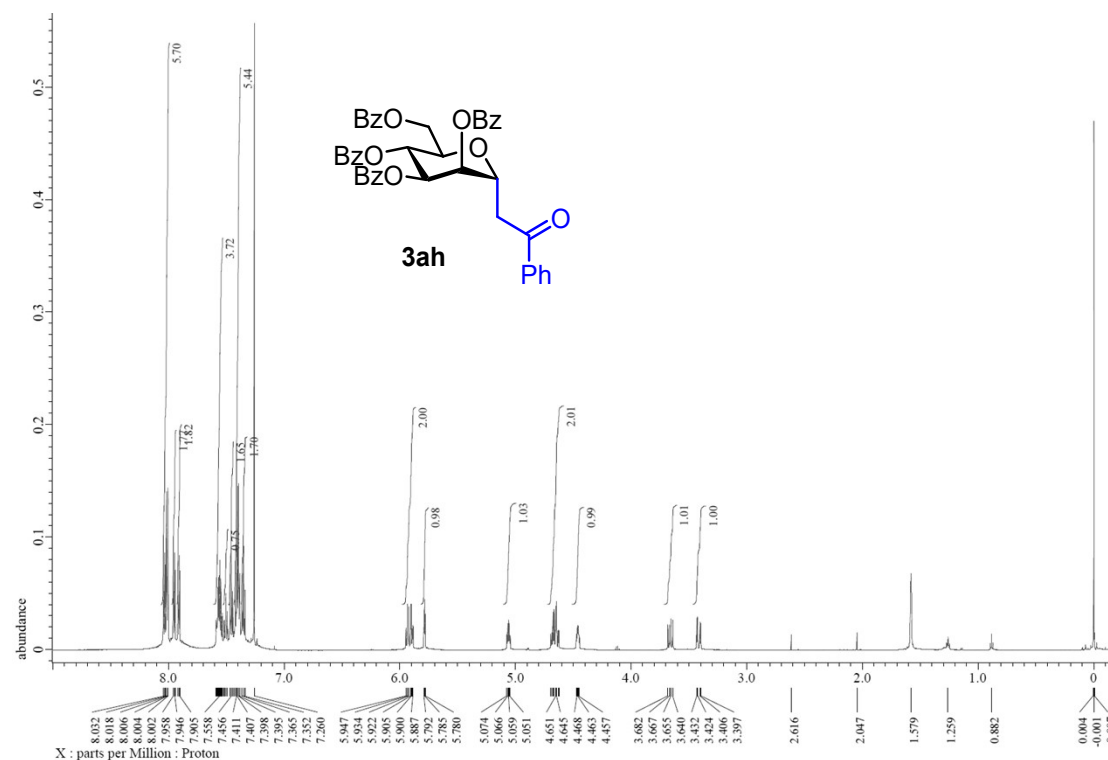

<sup>13</sup>C NMR spectra **3ah**

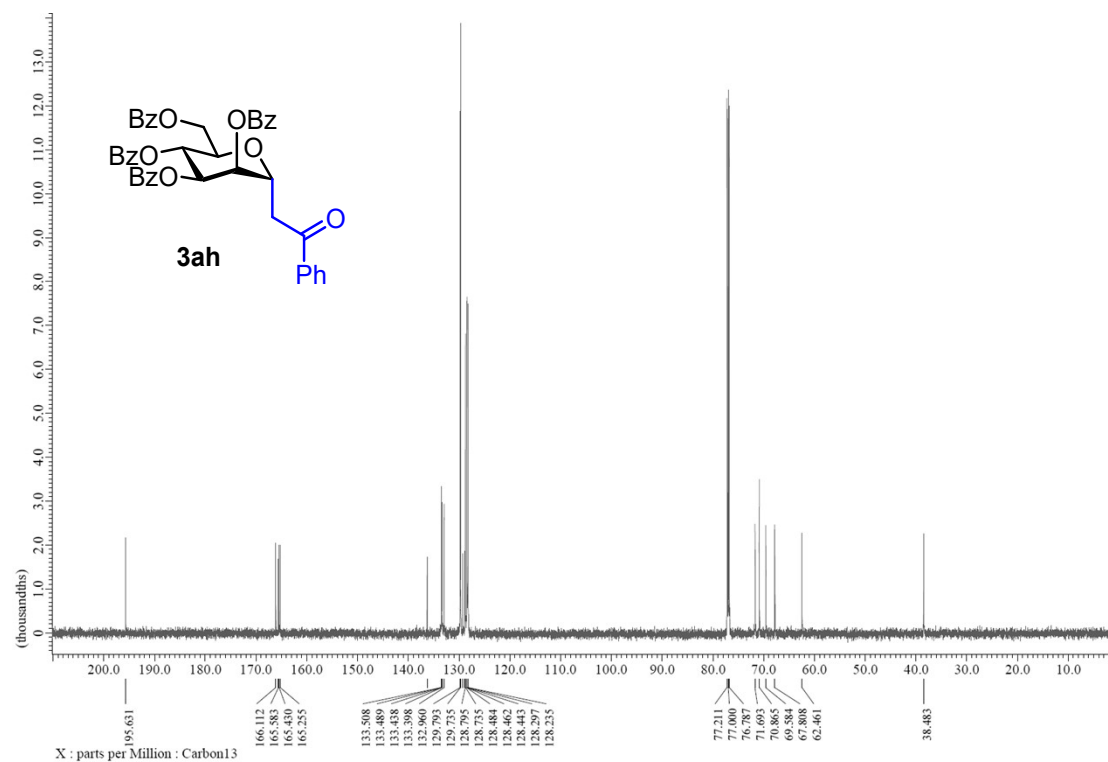

# <sup>1</sup>H NMR spectra **5aaa**

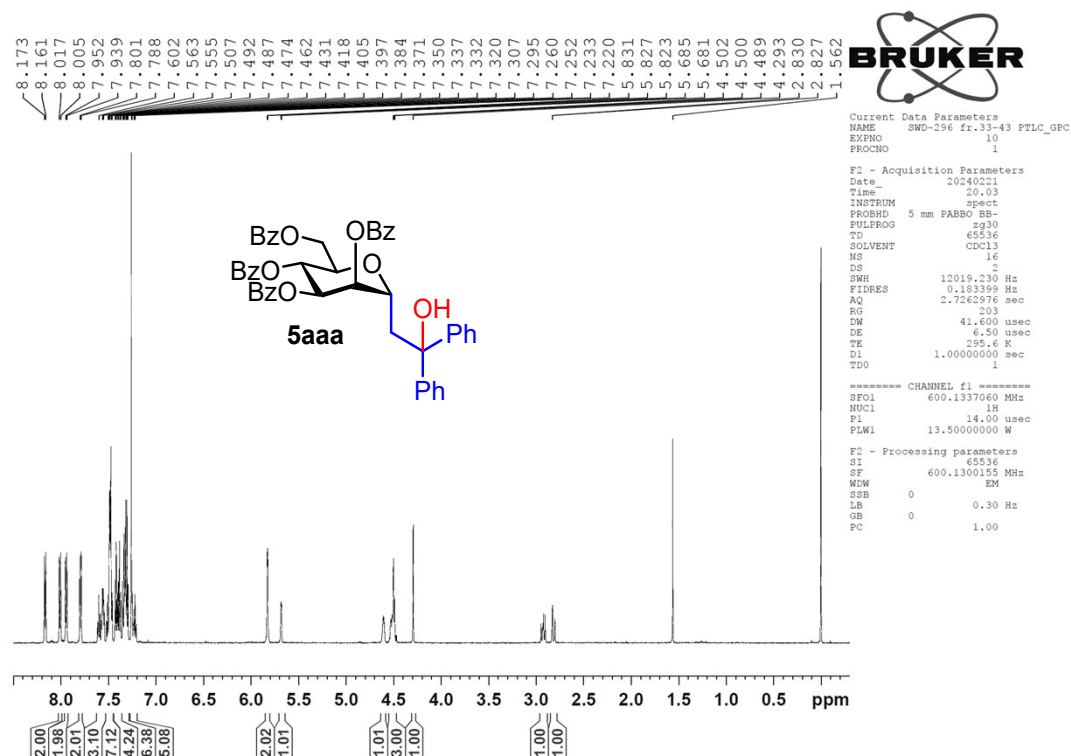

# <sup>13</sup>C NMR spectra **5aaa**

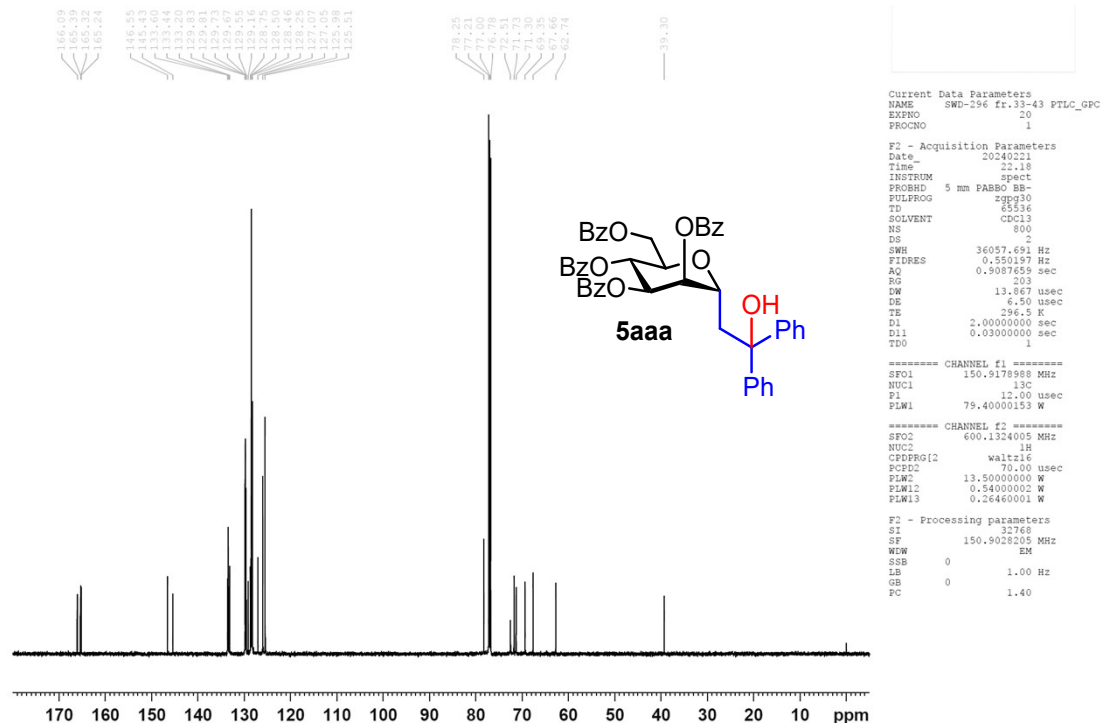

Chemical structure of **5aab** is shown above the spectrum. The structure is a bicyclic molecule with a benzylidene group (BzO) and a benzyl group (OBz) on a cyclohexane ring. The 5-position of the cyclohexane ring is substituted with a 2-methoxy-2-phenylethyl group (OMe and Ph).

**1H NMR Spectrum (CDCl<sub>3</sub>):**

- Chemical Shifts (ppm):** 8.046, 8.033, 7.993, 7.981, 7.946, 7.933, 7.817, 7.804, 7.568, 7.554, 7.541, 7.529, 7.506, 7.494, 7.460, 7.425, 7.412, 7.388, 7.375, 7.362, 7.349, 7.340, 7.327, 7.314, 7.309, 7.309, 7.286, 7.286, 7.274, 7.260, 7.244, 7.211, 7.199, 5.999, 5.826, 5.821, 5.806, 5.484, 5.479, 5.475, 4.499, 4.494, 4.043, 3.131, 1.565.
- Integration Values:** 1.96, 2.39, 2.06, 2.18, 4.86, 4.39, 17.38, 1.09, 1.16, 1.16, 1.00, 1.07, 0.98, 1.99, 3.00, 1.00, 1.00.

**Current Data Parameters:**

| NAME   | SWD-298 fr.26-28 | GS |
|--------|------------------|----|
| EXPNO  | 10               |    |
| PROCNO | 1                |    |

**F2 - Acquisition Parameters:**

| Date_   | 20240222       |
|---------|----------------|
| Time    | 17.12          |
| INSTRUM | spect          |
| PROBHD  | 5 mm PABBO BB- |
| PULPROG | zg30           |
| TD      | 65536          |
| SOLVENT | CDCl3          |
| NS      | 16             |
| DS      | 2              |
| SWH     | 12019.230 Hz   |
| FIDRES  | 0.183399 Hz    |
| AQ      | 2.7262976 sec  |
| RG      | 203            |
| DW      | 41.600 usec    |
| DE      | 6.50 usec      |
| TE      | 294.5 K        |
| DI      | 1.00000000 sec |
| TDO     | 1              |

**Channel f1:**

|      |                 |
|------|-----------------|
| SFO1 | 600.1337060 MHz |
| NUC1 | 1H              |
| P1   | 14.00 usec      |
| PLW1 | 13.50000000 W   |

**F2 - Processing parameters:**

|     |                 |
|-----|-----------------|
| SI  | 65536           |
| SF  | 600.1300154 MHz |
| WDW | EM              |
| SSB | 0               |
| LB  | 0.30 Hz         |
| GB  | 0               |
| PC  | 1.00            |

**Current Data Parameters**

| NAME   | SWD-298 fr.26-28 GPC |
|--------|----------------------|
| EXPNO  | 20                   |
| PROCNO | 1                    |

  

**F2 - Acquisition Parameters**

| Date_    | Time           |
|----------|----------------|
| 20240223 | 19:54          |
| INSTRUM  | spect          |
| PROBHD   | 5 mm PABBO BB- |
| PULPROG  | zgpg30         |
| TD       | 65536          |
| SOLVENT  | CDCl3          |
| NS       | 1000           |
| DS       | 2              |
| AQ       | 36057.691 Hz   |
| FIDRES   | 0.550197 Hz    |
| RG       | 0.9087659 sec  |
| DW       | 203            |
| DE       | 13.867 usec    |
| TE       | 6.50 usec      |
| D1       | 295.1 K        |
| D11      | 2.00000000 sec |
| TD0      | 0.03000000 sec |

  

**===== CHANNEL f1 =====**

| SFO1            | NUC1 | F1         | PLW1          |
|-----------------|------|------------|---------------|
| 150.9178988 MHz | 13C  | 12.00 usec | 79.40000153 W |

  

**===== CHANNEL f2 =====**

| SFO2            | NUC2 | waitz16 | CPDPRG[2] | PCPD2      | PLW2          | PLW12        | PLW13        |
|-----------------|------|---------|-----------|------------|---------------|--------------|--------------|
| 600.1324005 MHz | 1H   |         |           | 70.00 usec | 13.50000000 W | 0.54000002 W | 0.26460001 W |

  

**F2 - Processing parameters**

| SI    | SF              | WDW | SSB | GB | LB      | PC   |
|-------|-----------------|-----|-----|----|---------|------|
| 32768 | 150.9028189 MHz | EM  |     |    |         |      |
|       |                 |     | 0   |    | 1.00 Hz |      |
|       |                 |     | 0   |    |         | 1.40 |



<sup>1</sup>H NMR spectra **5ada major**

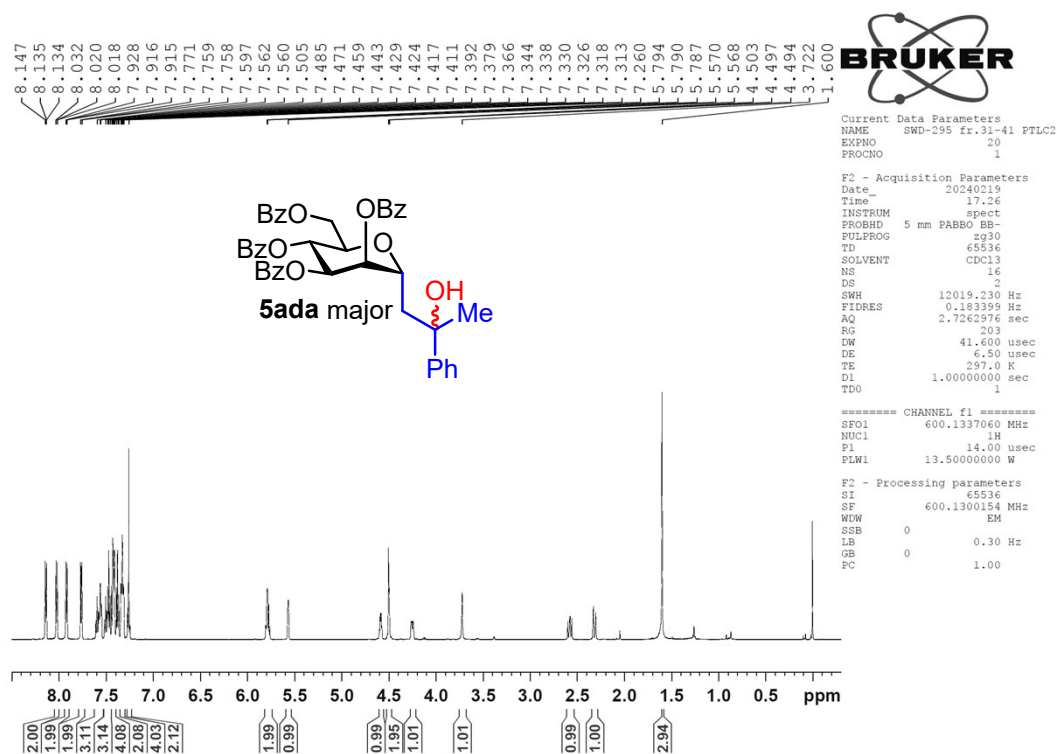

<sup>13</sup>C NMR spectra **5ada major**

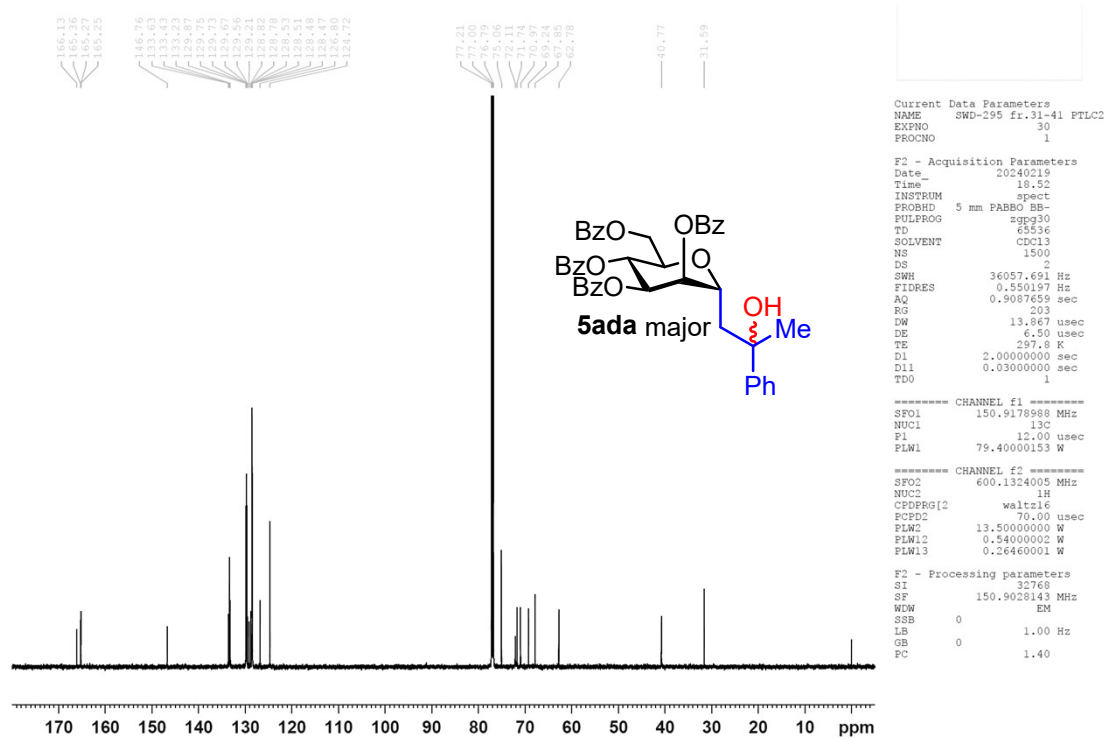



# <sup>1</sup>H NMR spectra **5aba major**

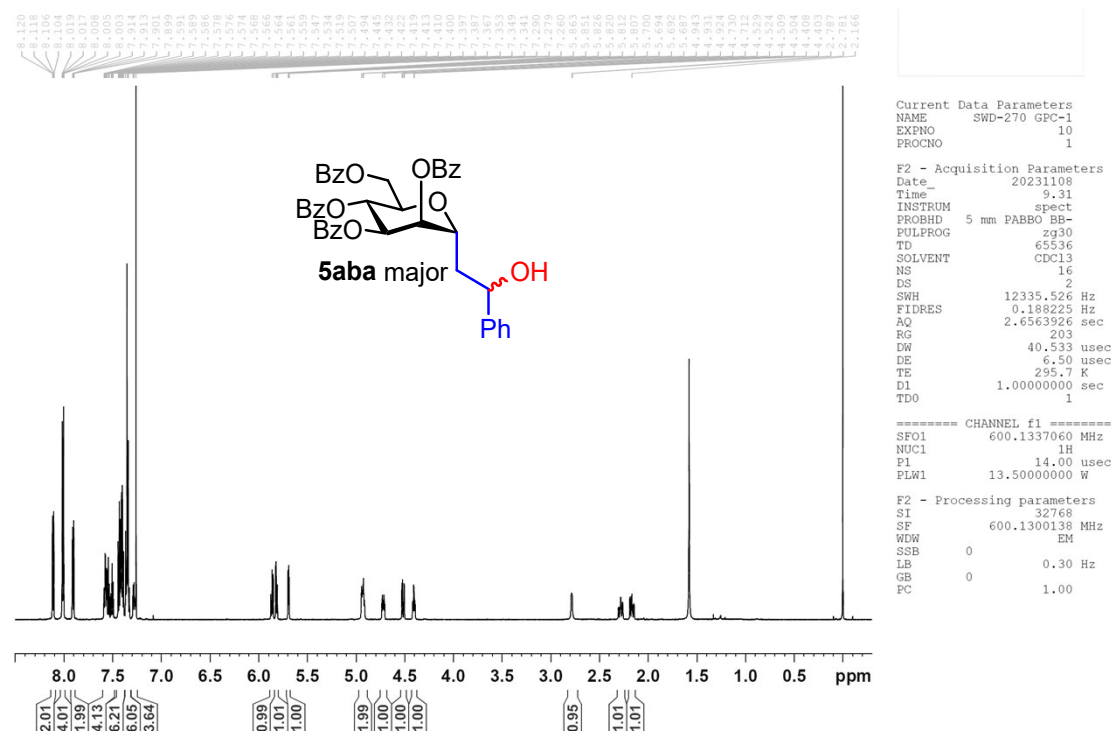

# <sup>13</sup>C NMR spectra **5aba major**

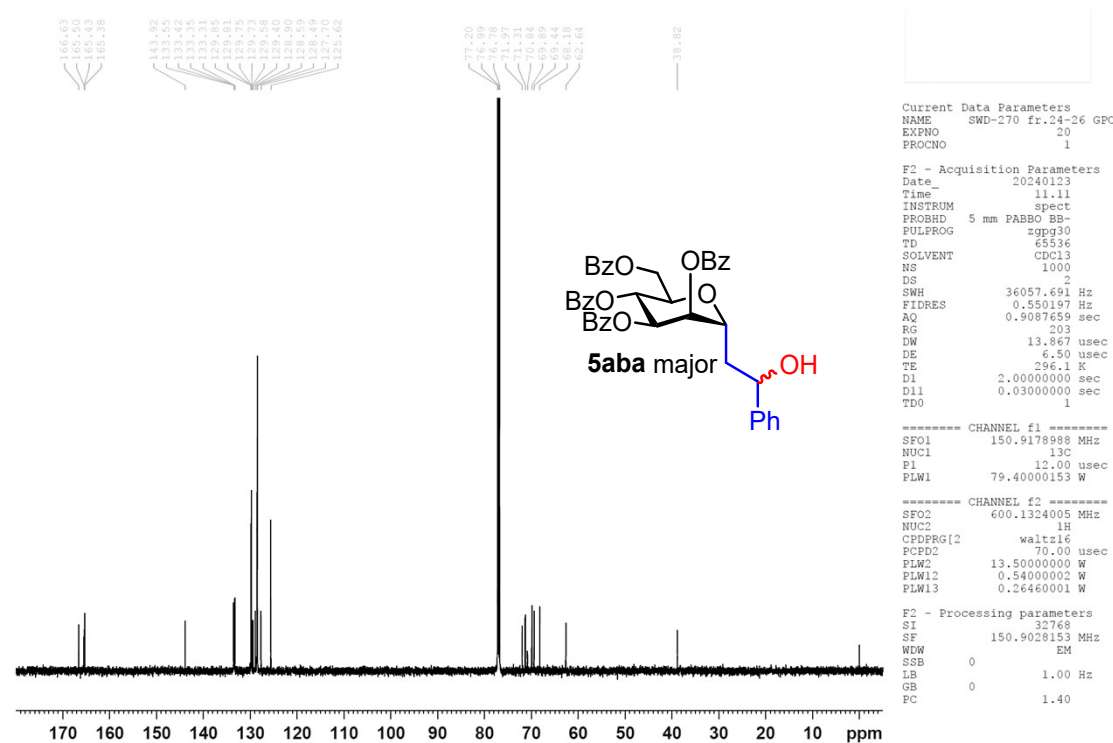

# <sup>1</sup>H NMR spectra **5aba** minor

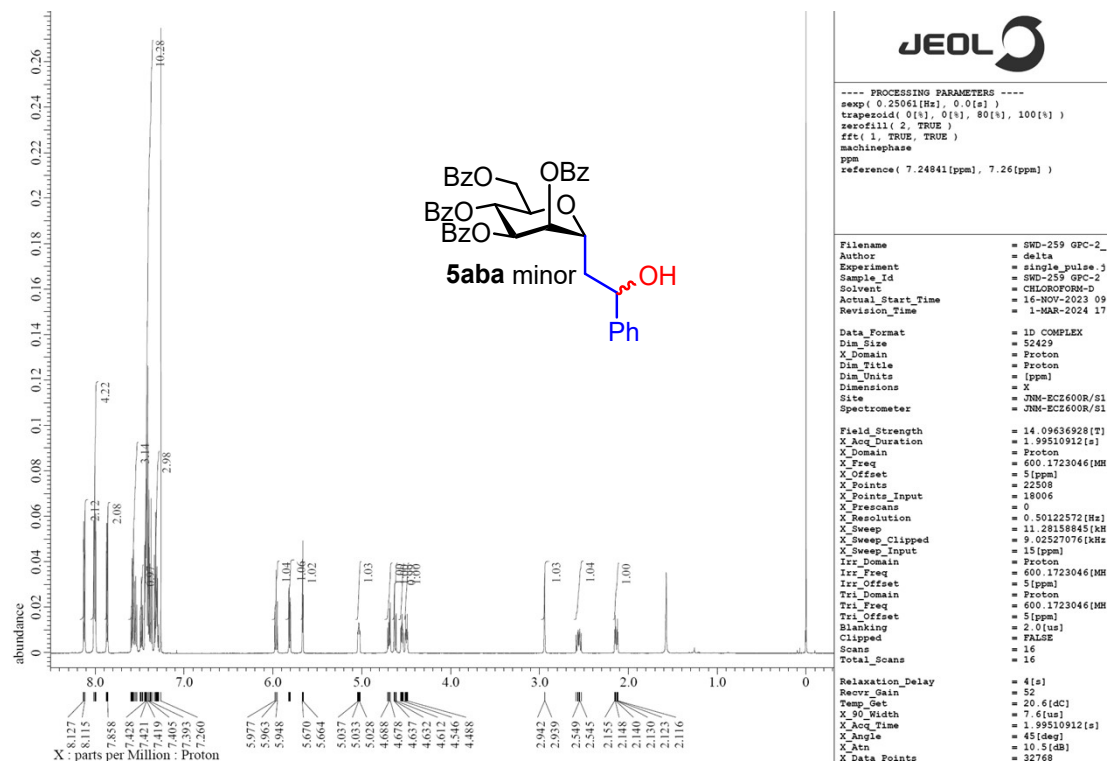

# <sup>13</sup>C NMR spectra **5aba** minor

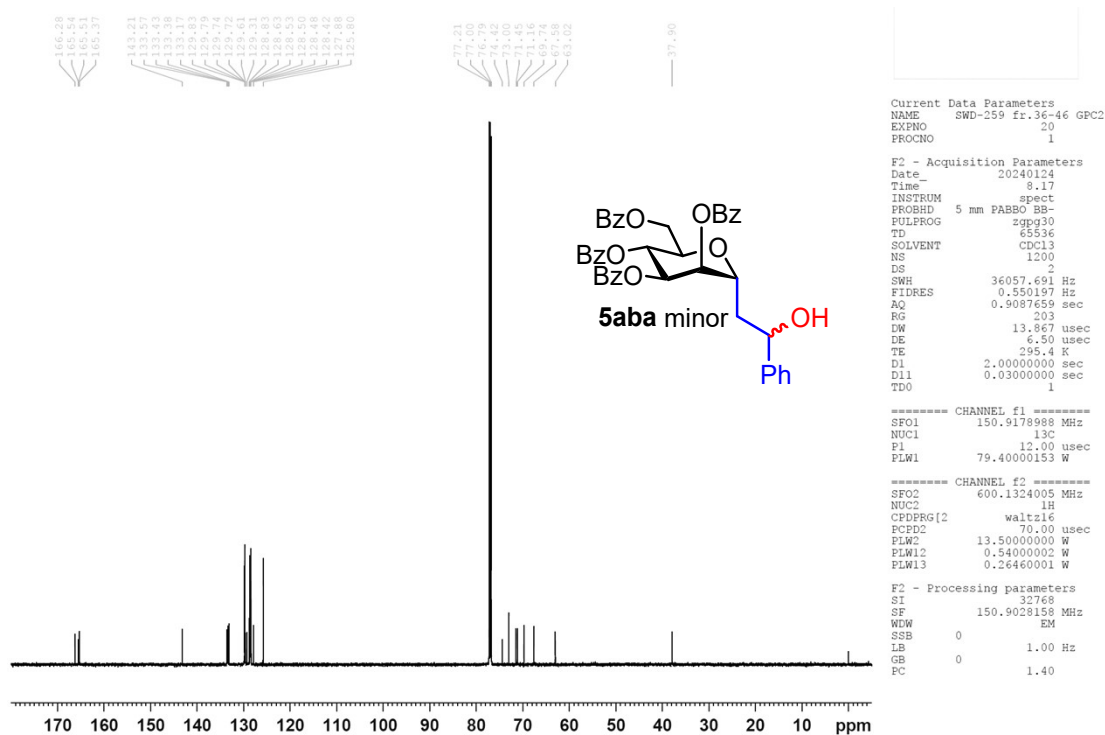

<sup>1</sup>H NMR spectra **5bba** major

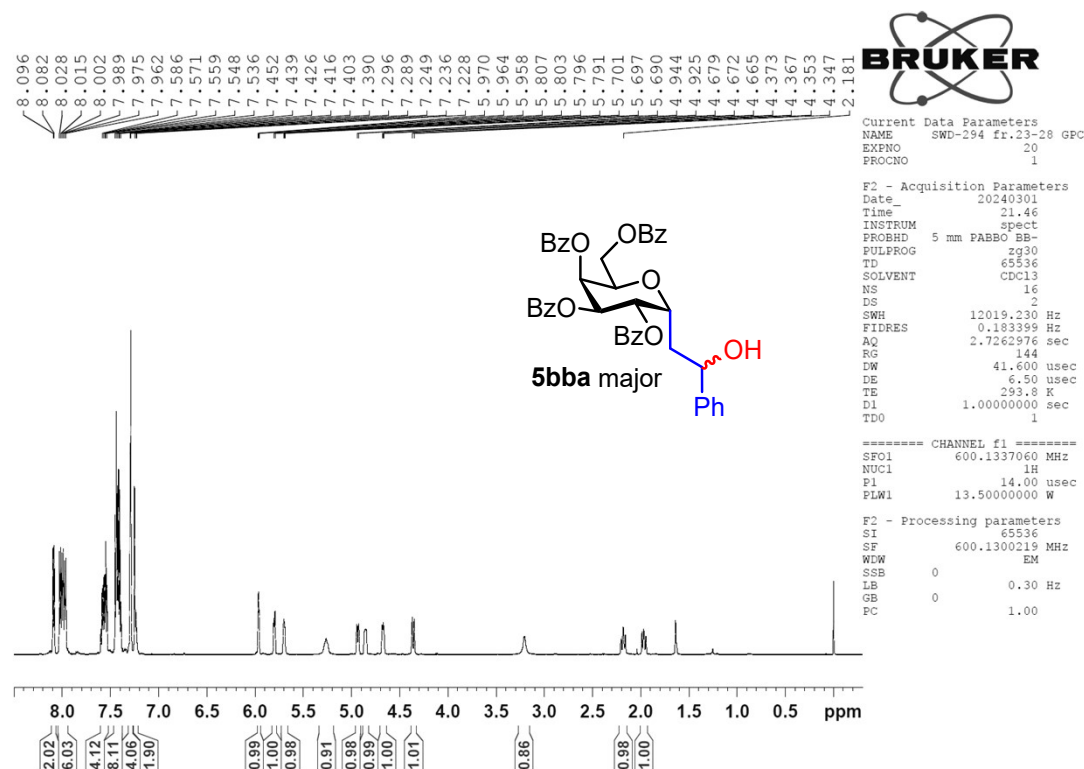

<sup>13</sup>C NMR spectra **5bba** major

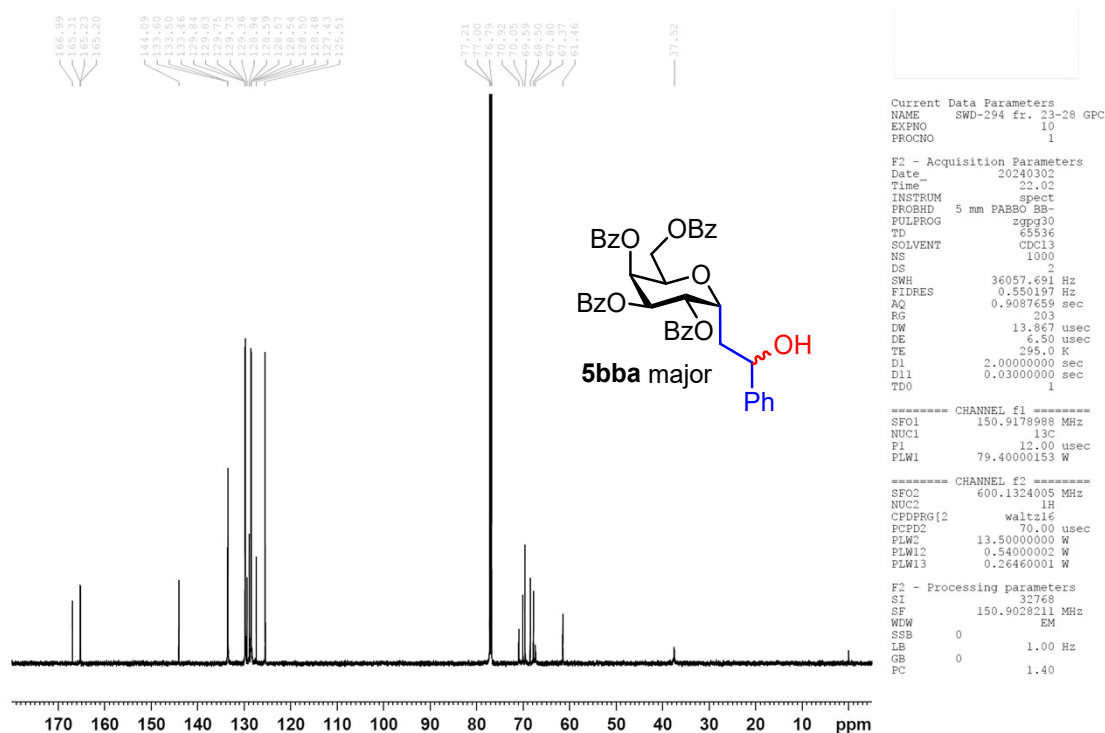

<sup>1</sup>H NMR spectra **5bba** minor

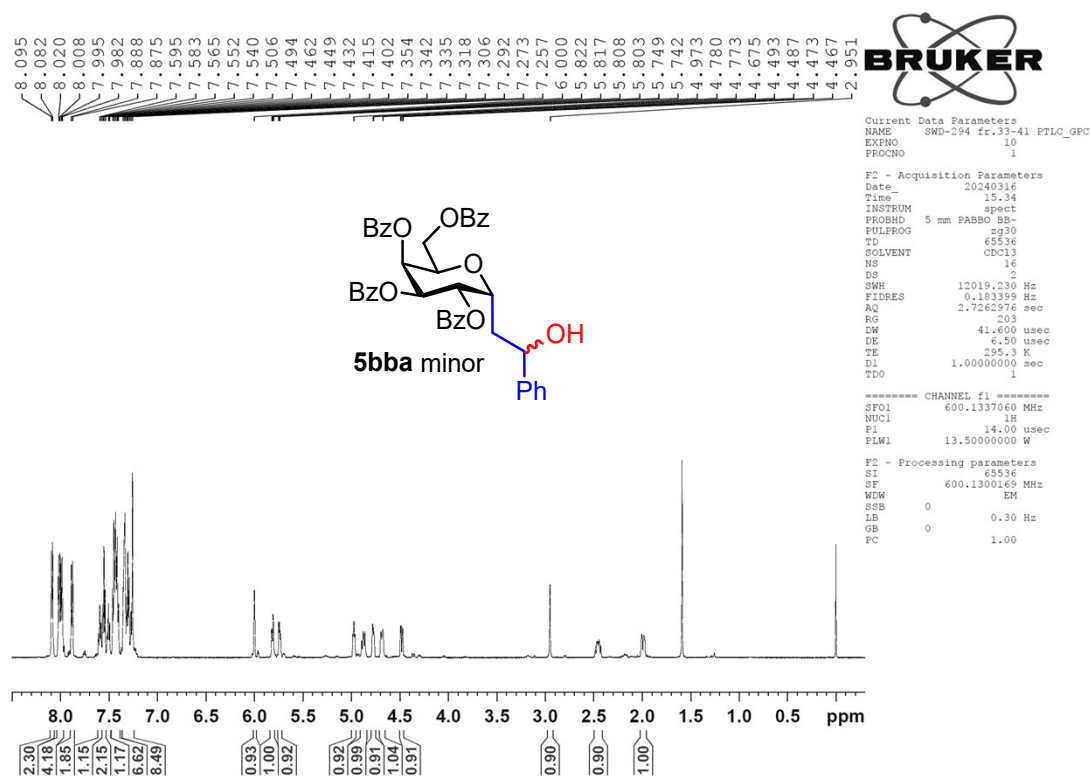

<sup>13</sup>C NMR spectra **5bba** minor

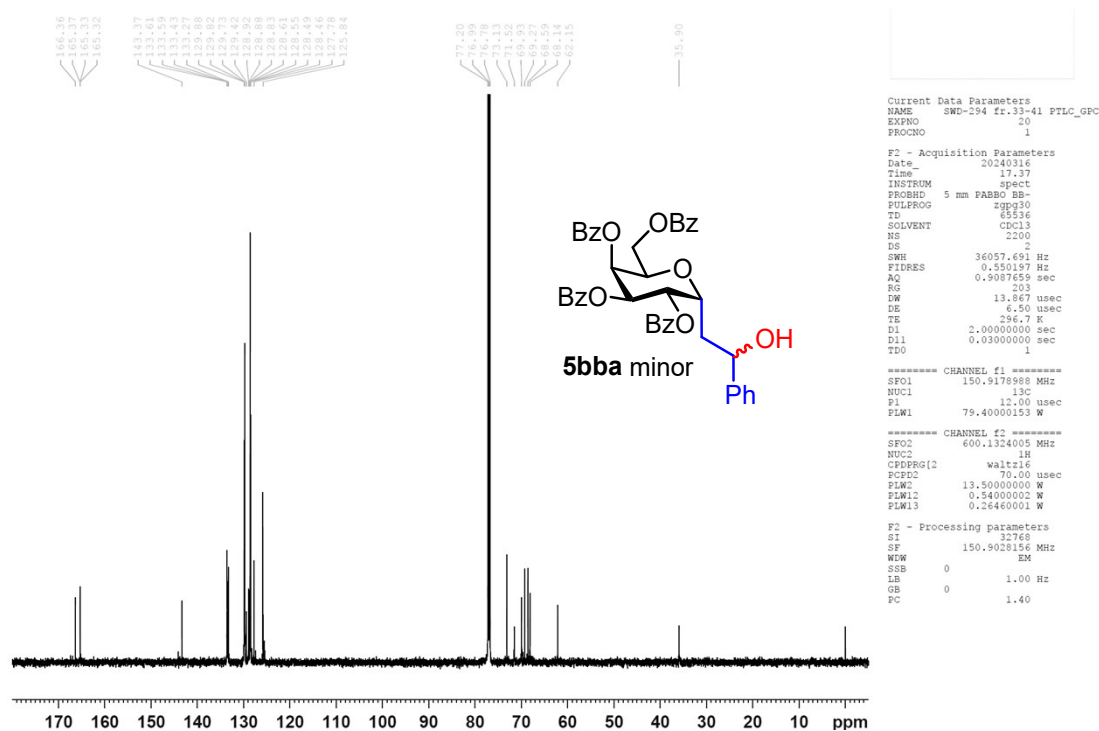

<sup>1</sup>H NMR spectra **5cba** major

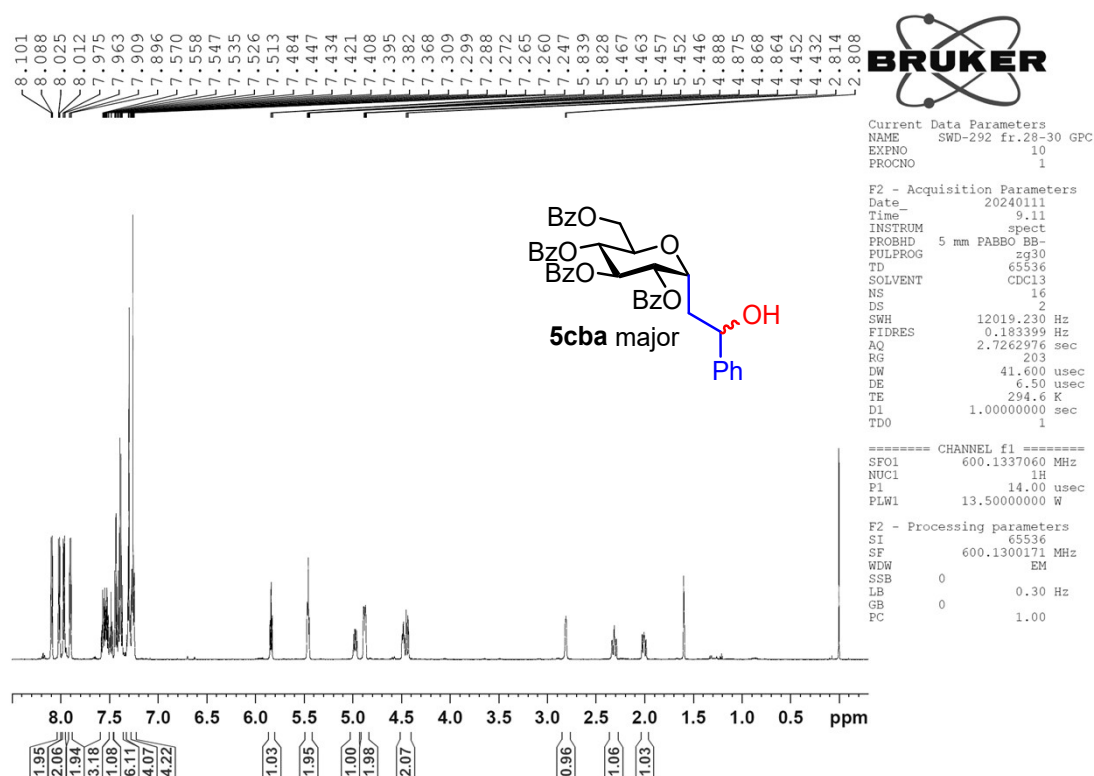

<sup>13</sup>C NMR spectra **5cba** major

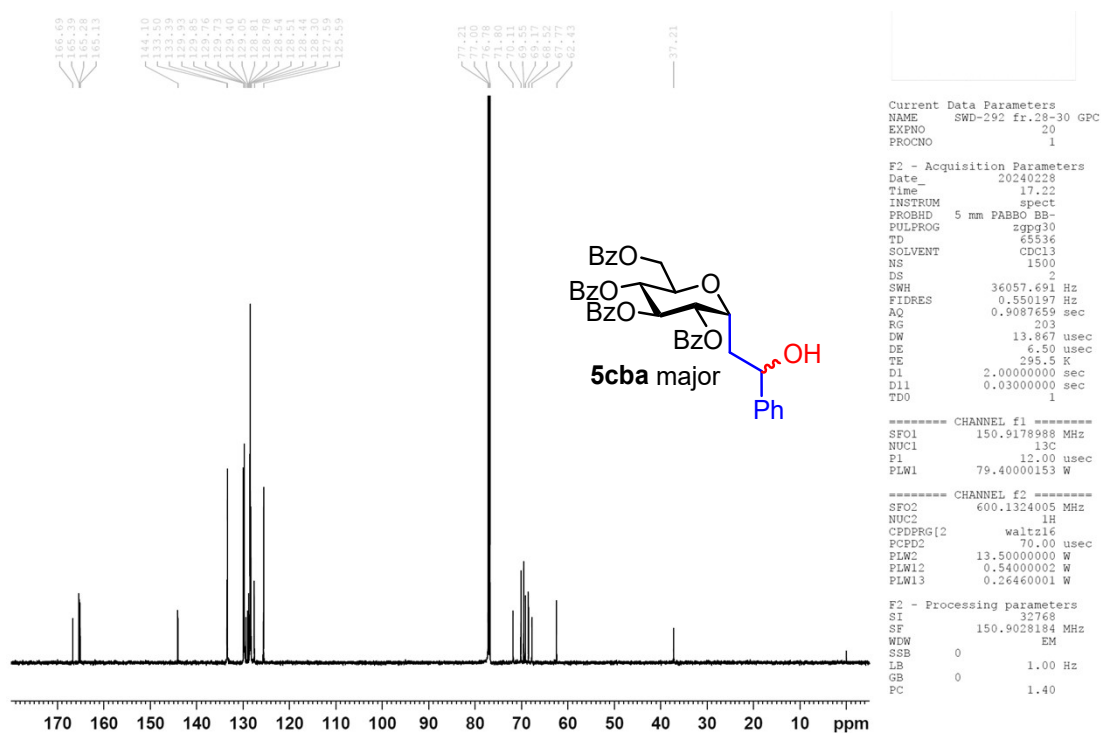

# <sup>1</sup>H NMR spectra **5cba** minor

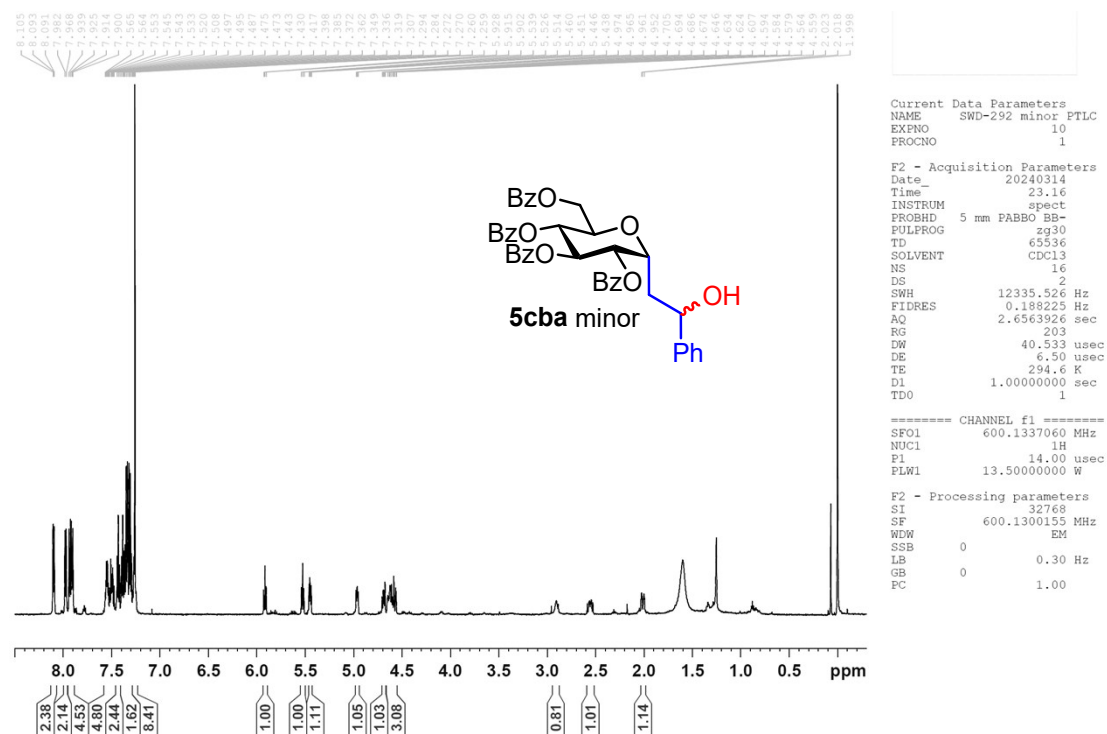

# <sup>13</sup>C NMR spectra **5cba** minor

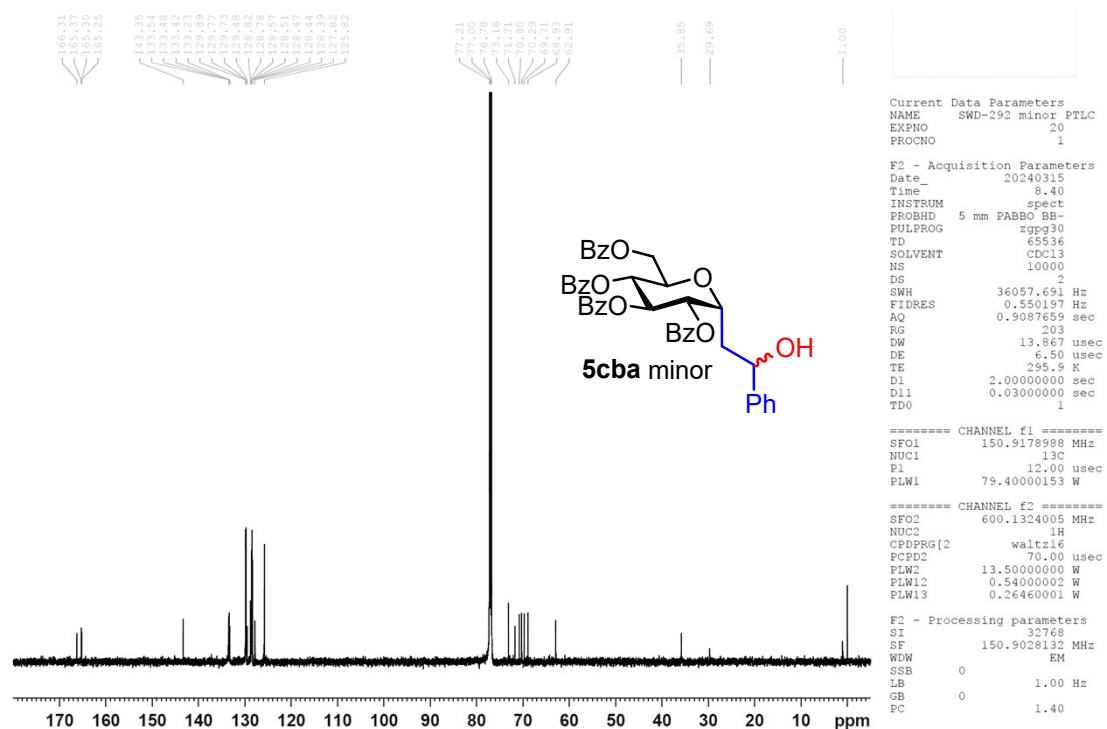

# <sup>1</sup>H NMR spectra **6aba-major**

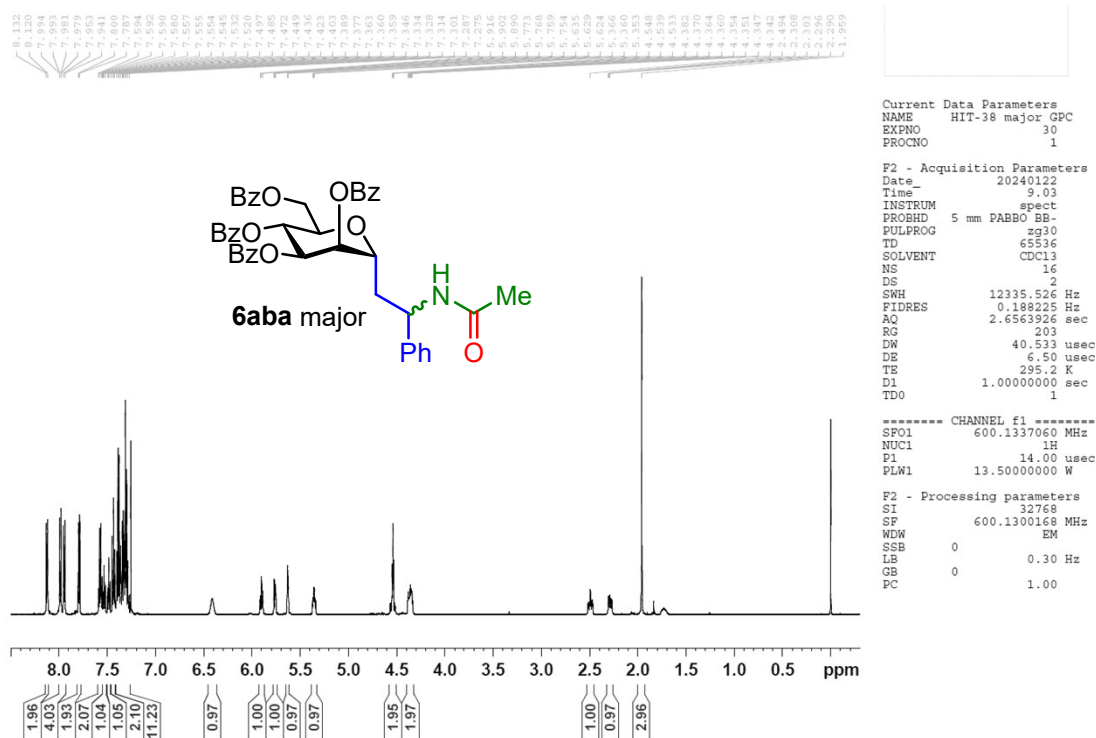

# <sup>13</sup>C NMR spectra **6aba-major**

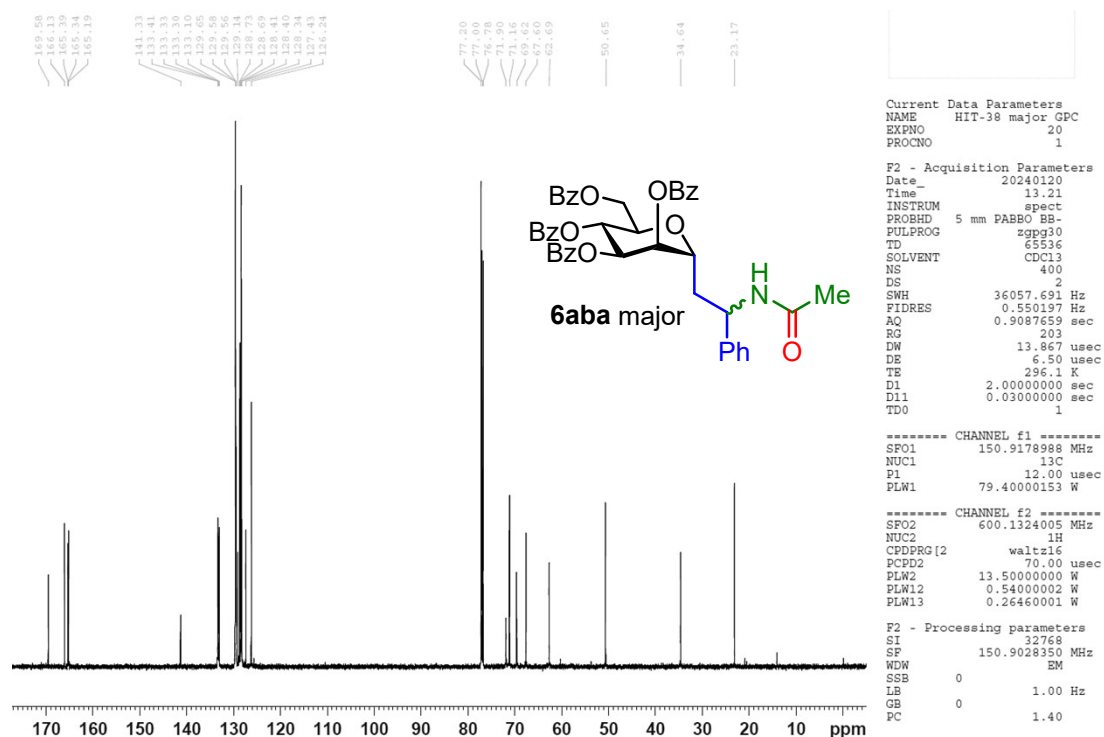

<sup>1</sup>H NMR spectra **6aba-minor**

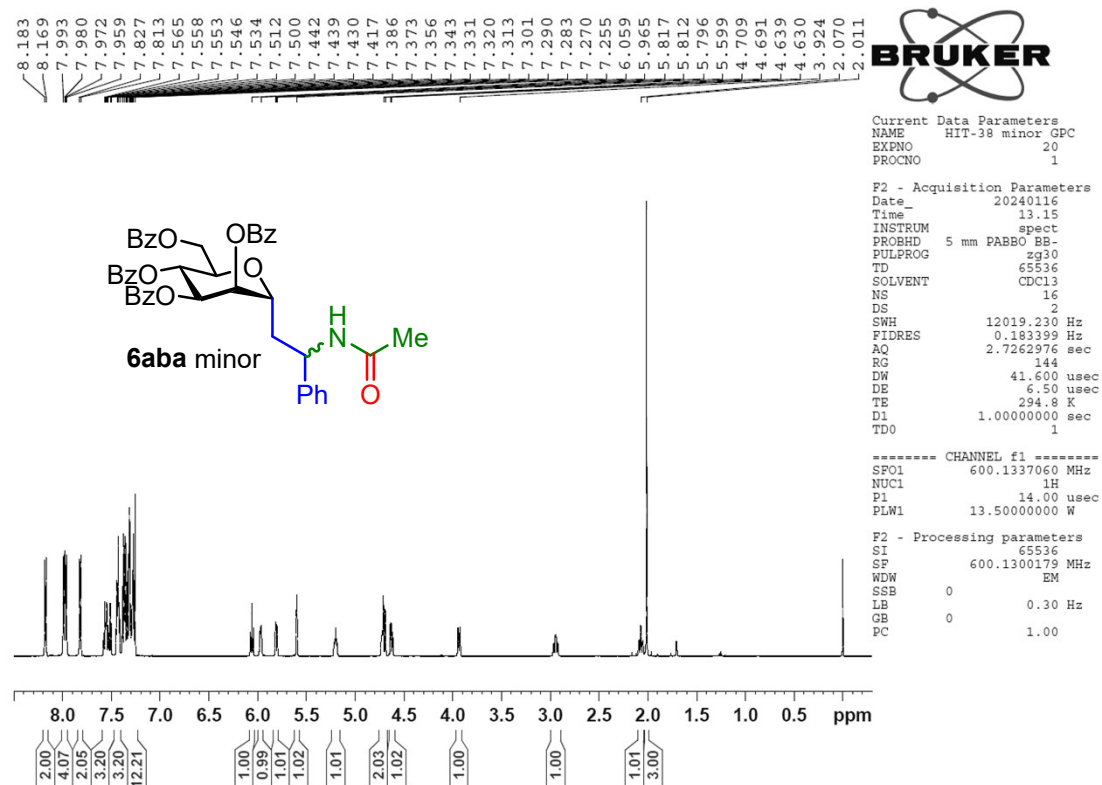

<sup>13</sup>C NMR spectra **6aba-minor**

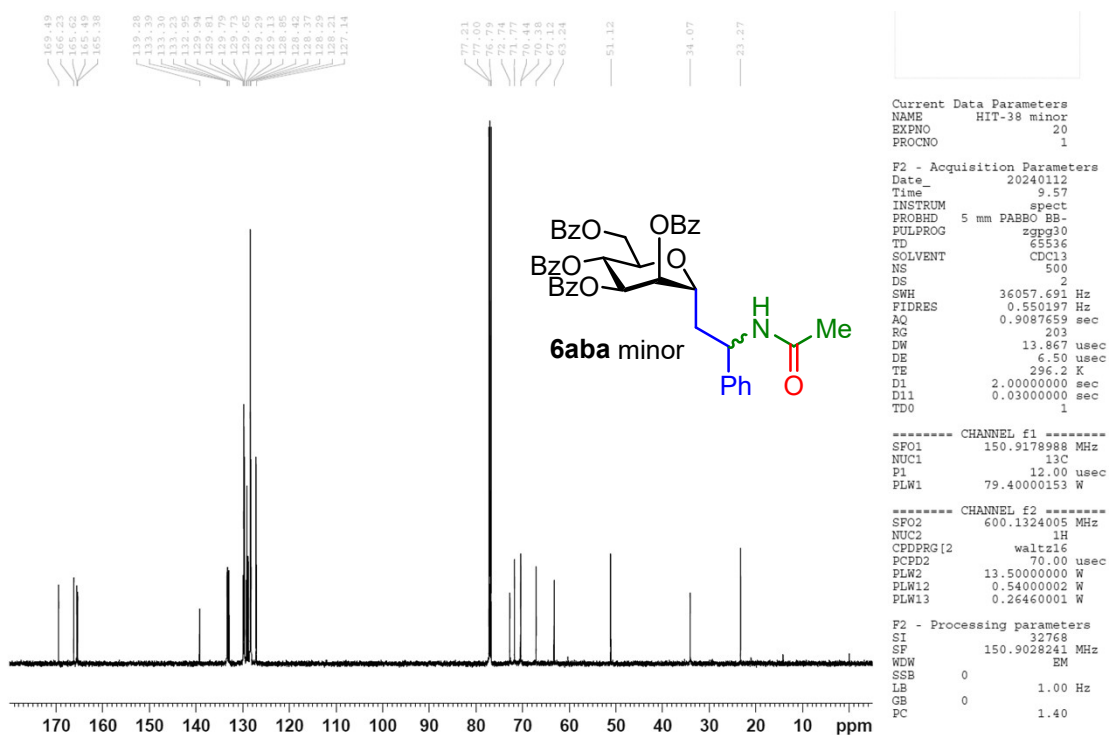

<sup>1</sup>H NMR spectra **6abb** major

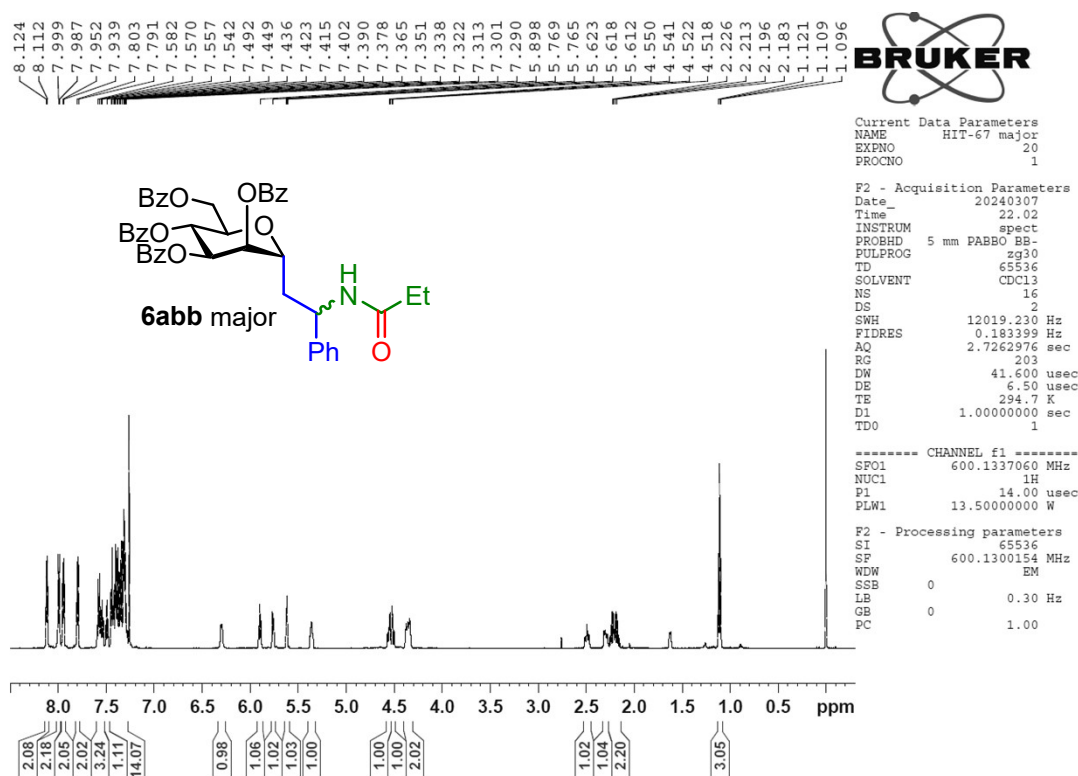

<sup>13</sup>C NMR spectra **6abb** major

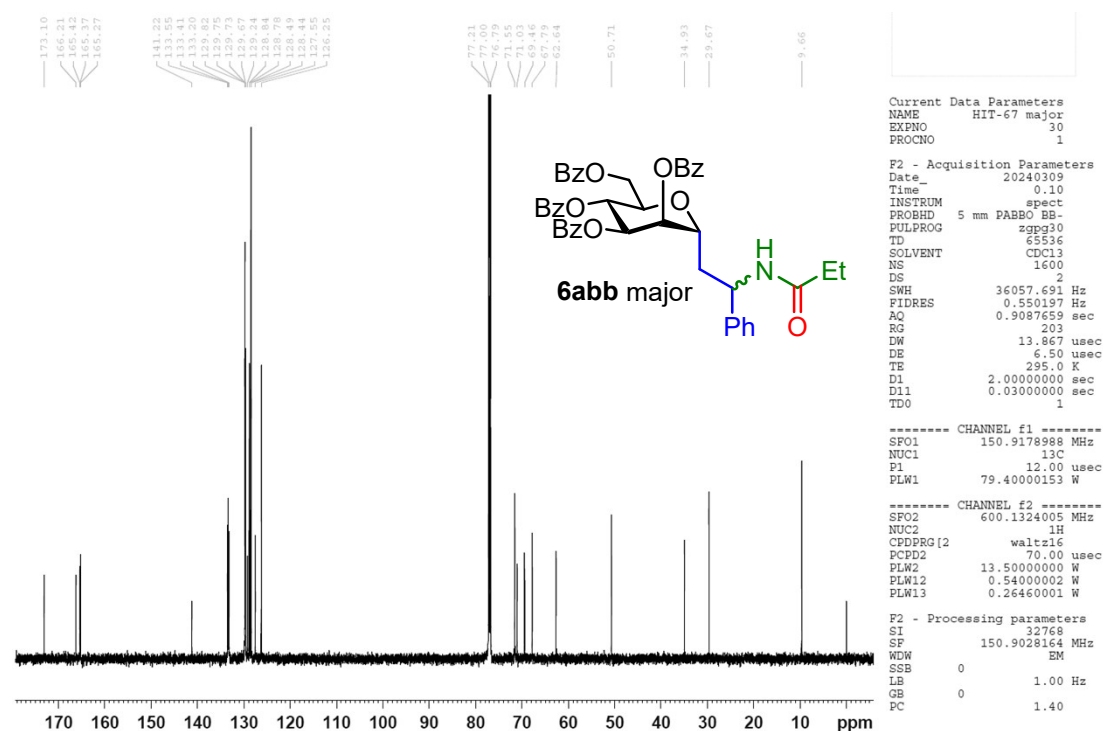

<sup>1</sup>H NMR spectra **6abb** minor

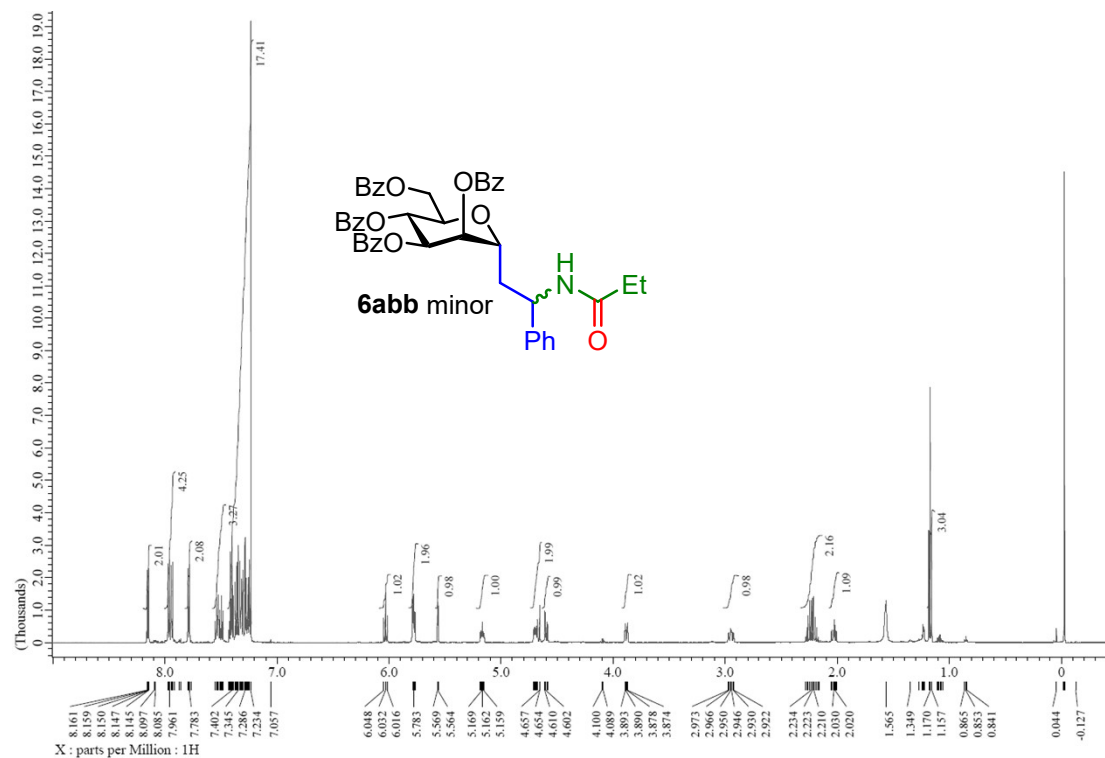

<sup>13</sup>C NMR spectra **6abb** minor

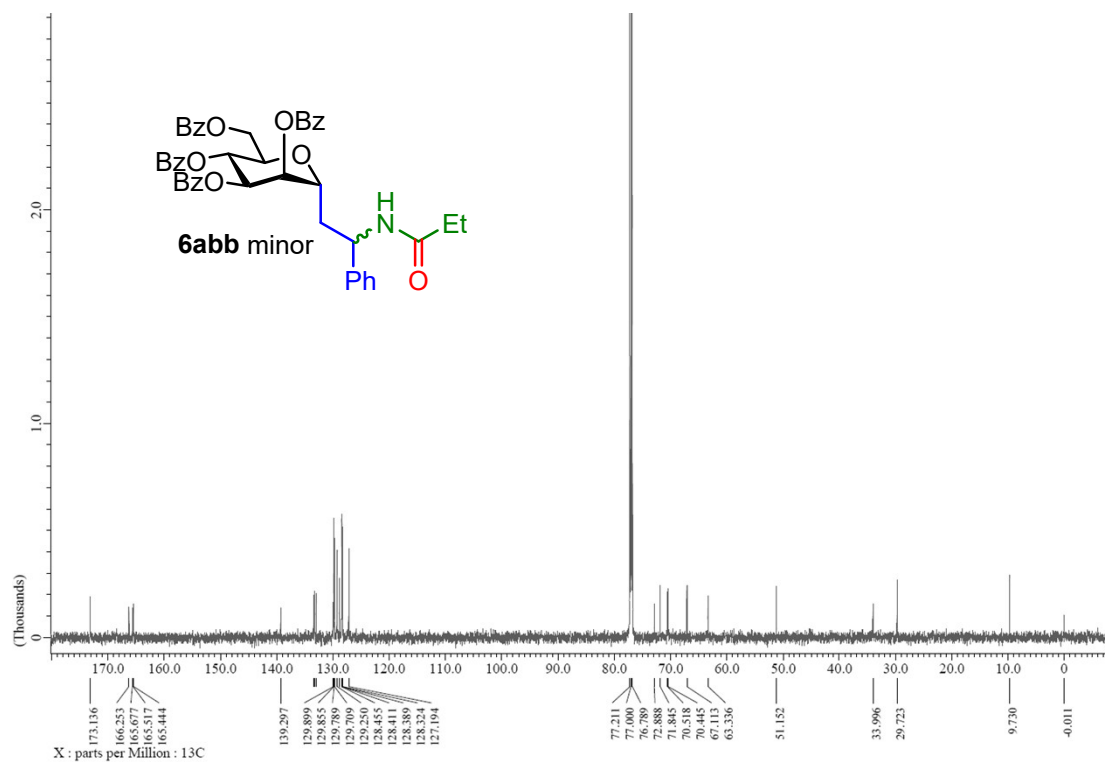

<sup>1</sup>H NMR spectra **6aea major**

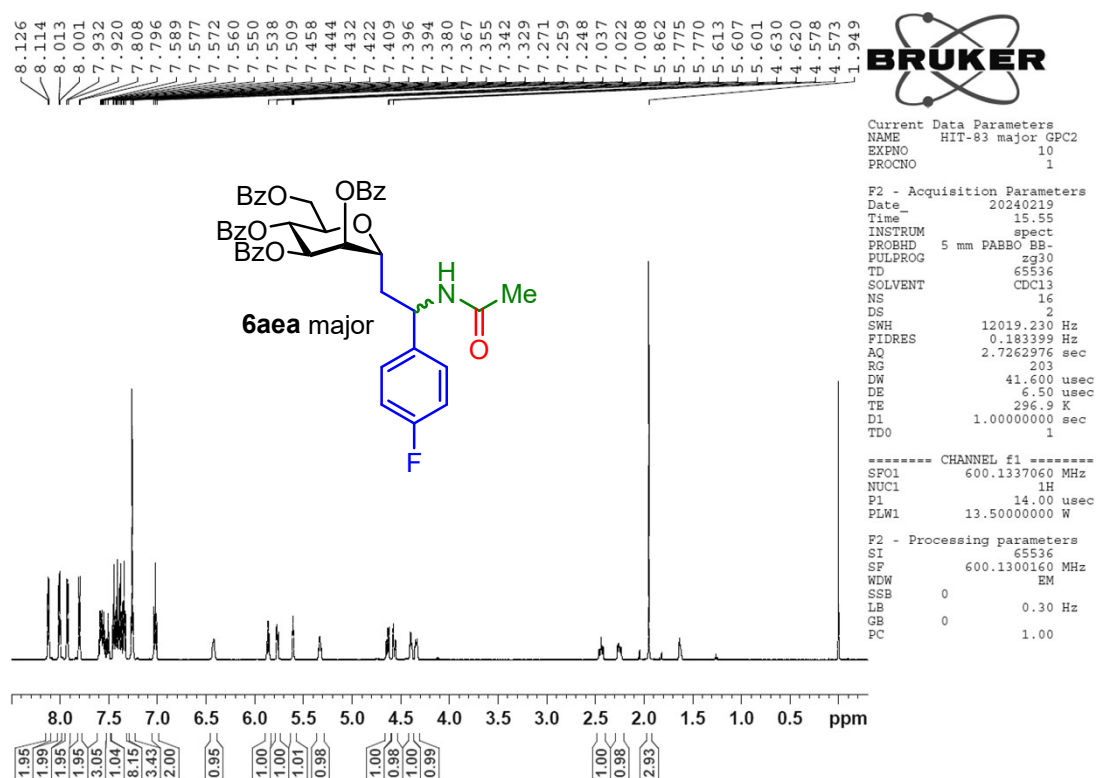

<sup>13</sup>C NMR spectra **6aea major**

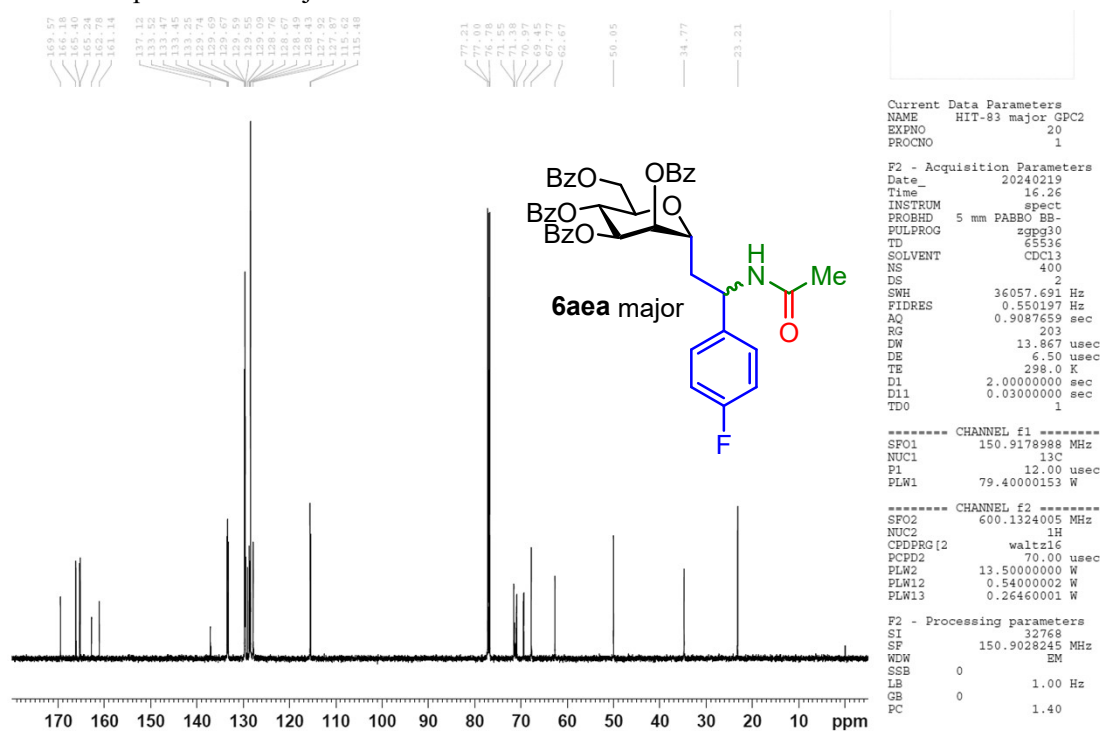

<sup>19</sup>F NMR 6aea major

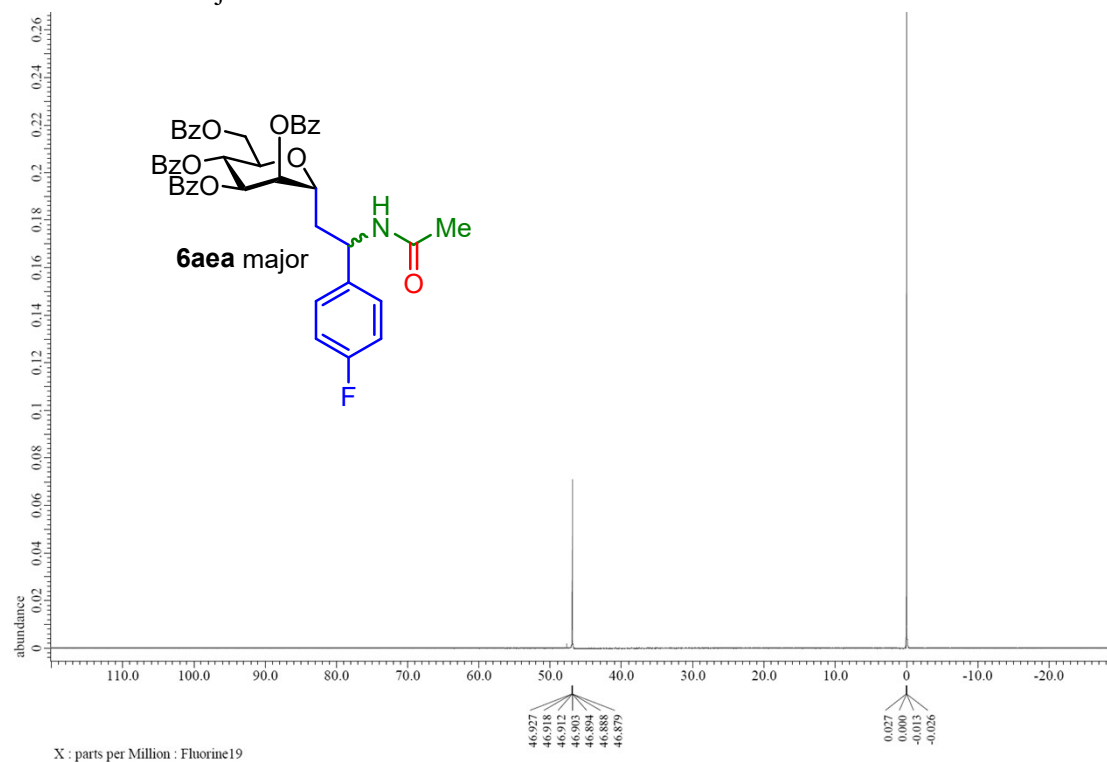

<sup>1</sup>H NMR spectra 6aea minor

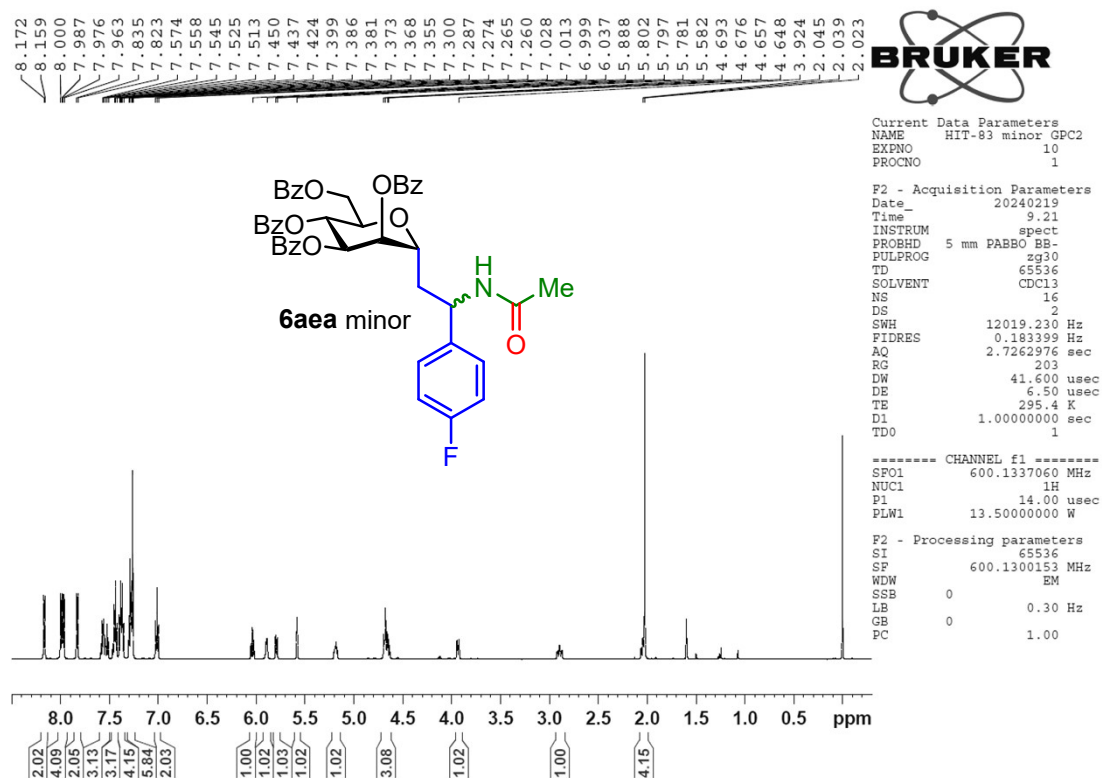

<sup>13</sup>C NMR spectra **6aea** minor

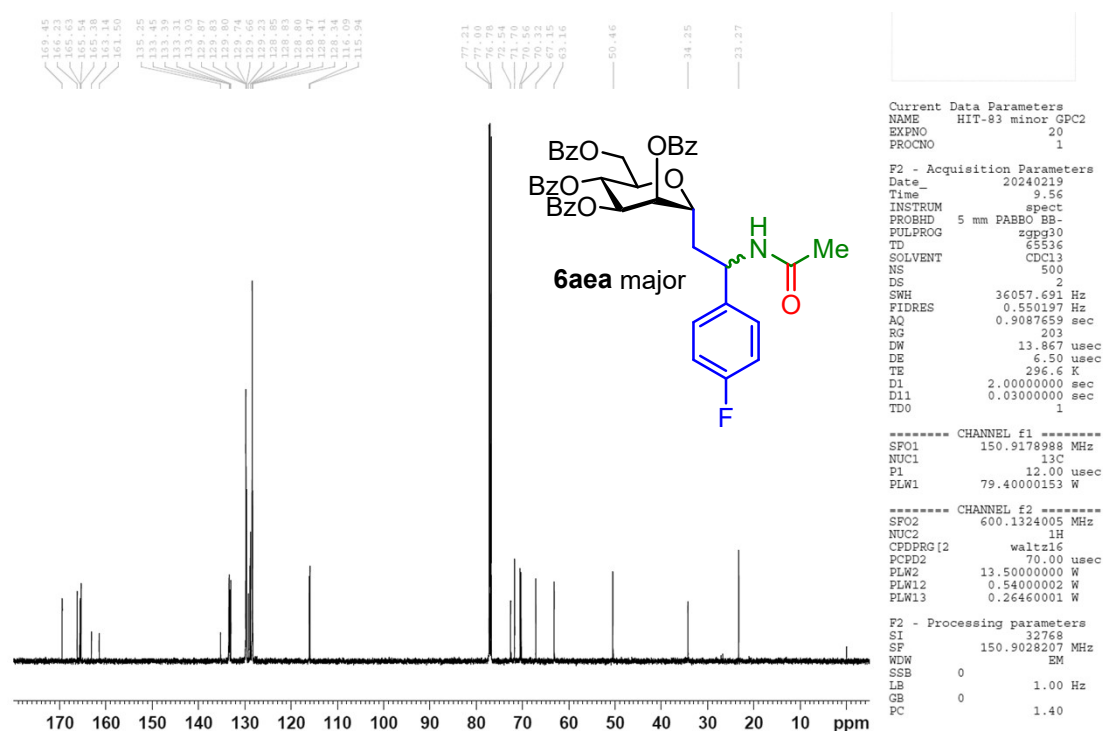

<sup>19</sup>F NMR **6aea** minor

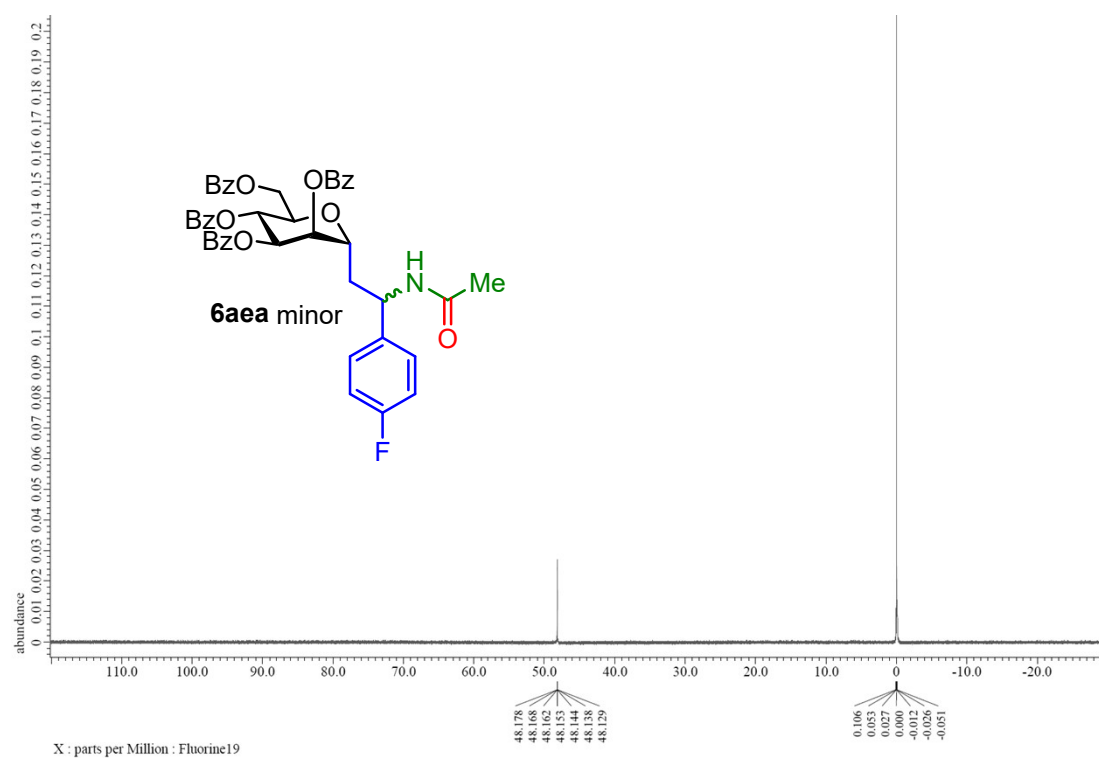

# <sup>1</sup>H NMR spectra **6afa** major

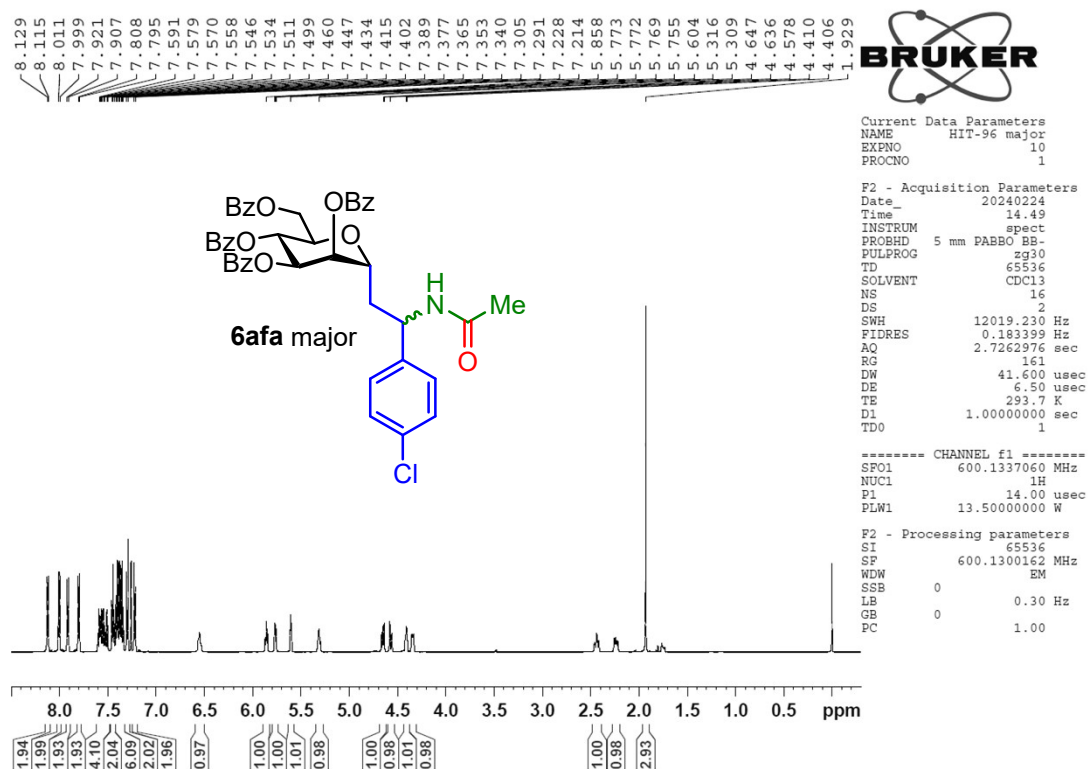

# <sup>13</sup>C NMR spectra **6afa** major

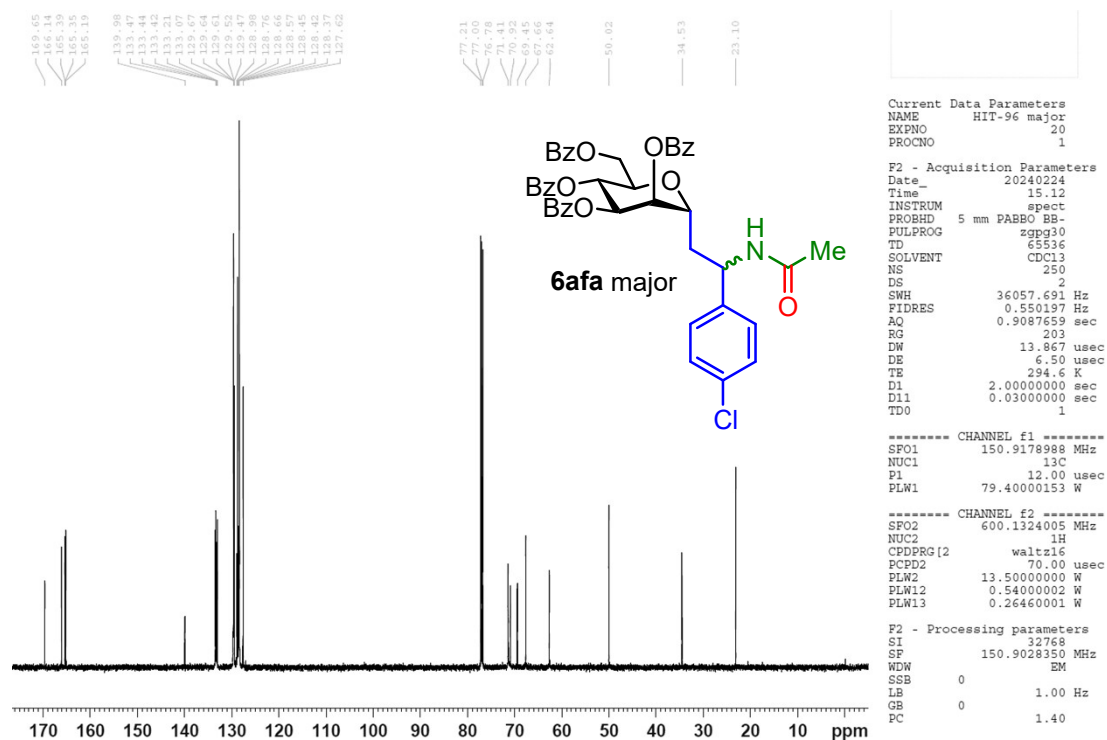

<sup>1</sup>H NMR spectra **6afa** minor

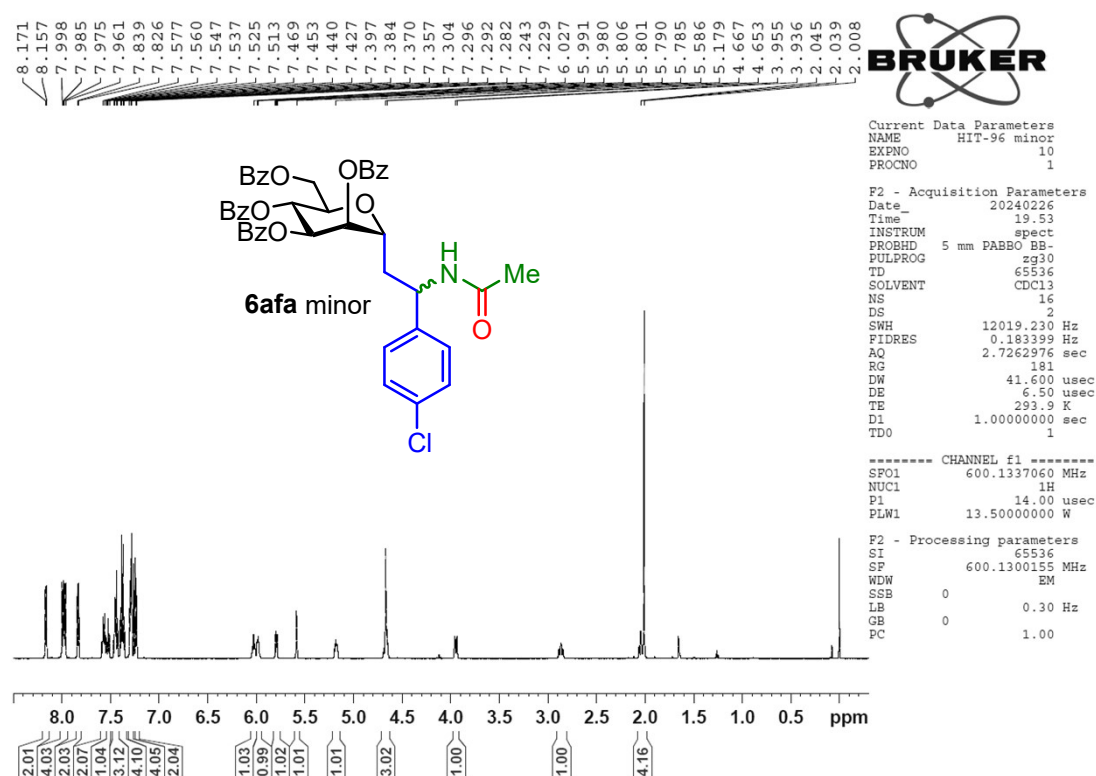

<sup>13</sup>C NMR spectra **6afa** minor

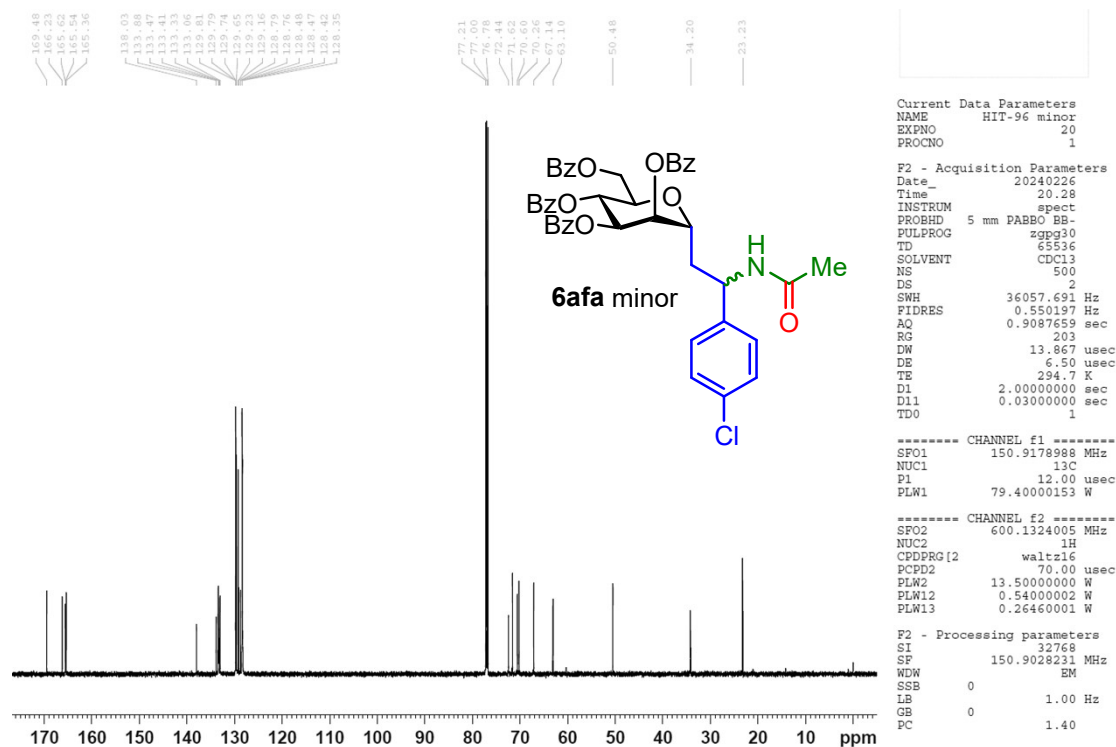

# <sup>1</sup>H NMR spectra **6aga major**

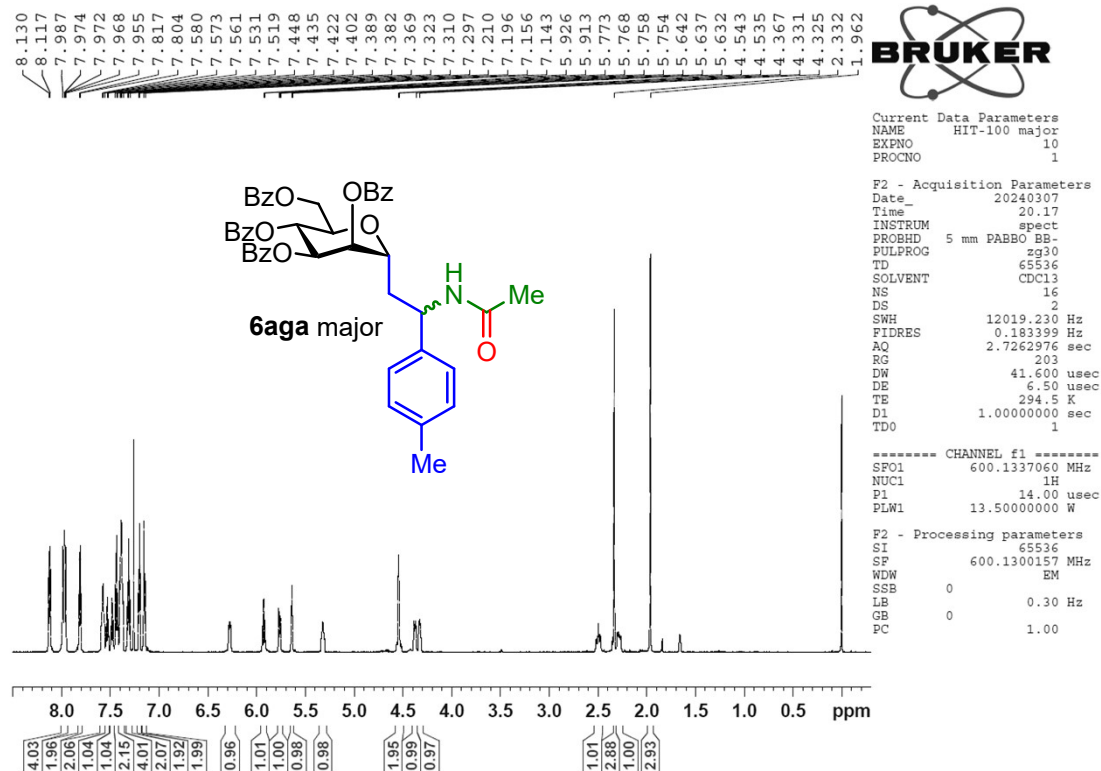

# <sup>13</sup>C NMR spectra **6aga major**

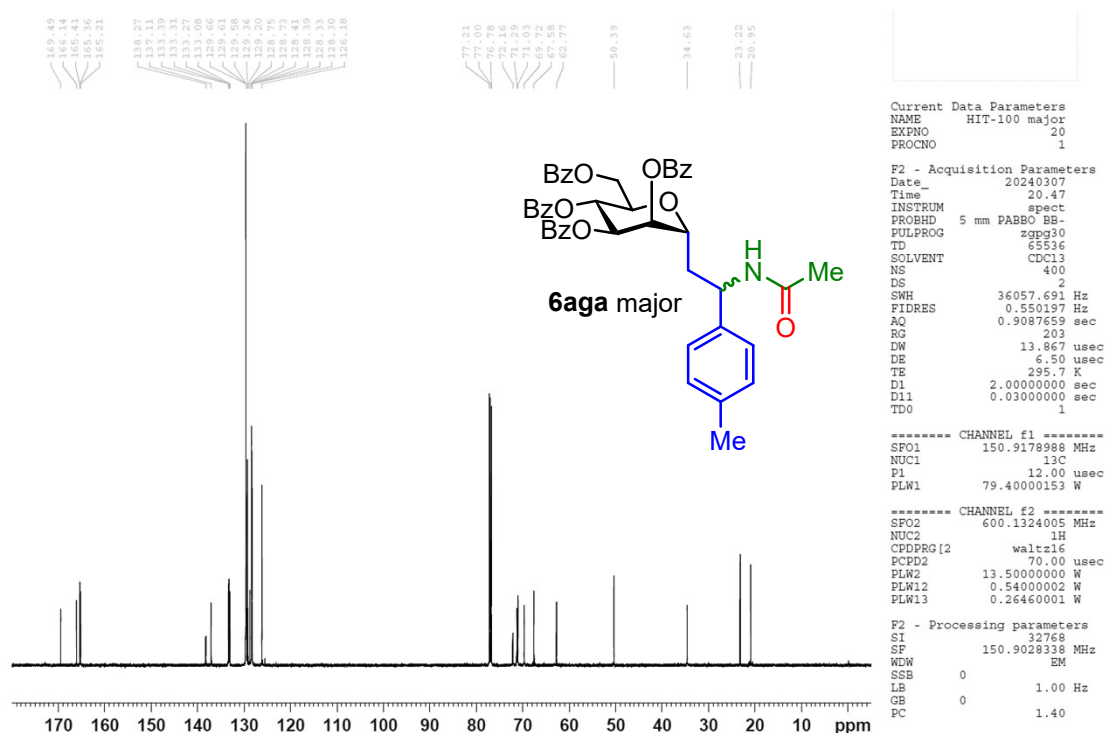

<sup>1</sup>H NMR spectra **6aga minor**

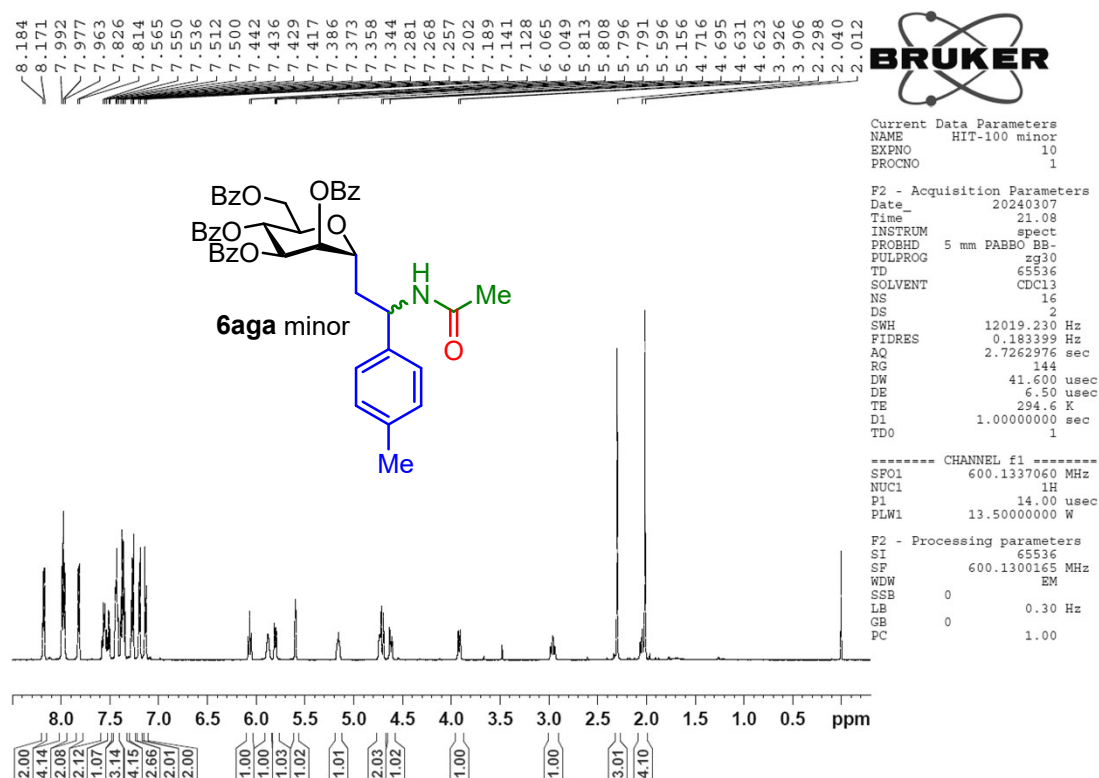

<sup>13</sup>C NMR spectra **6aga minor**

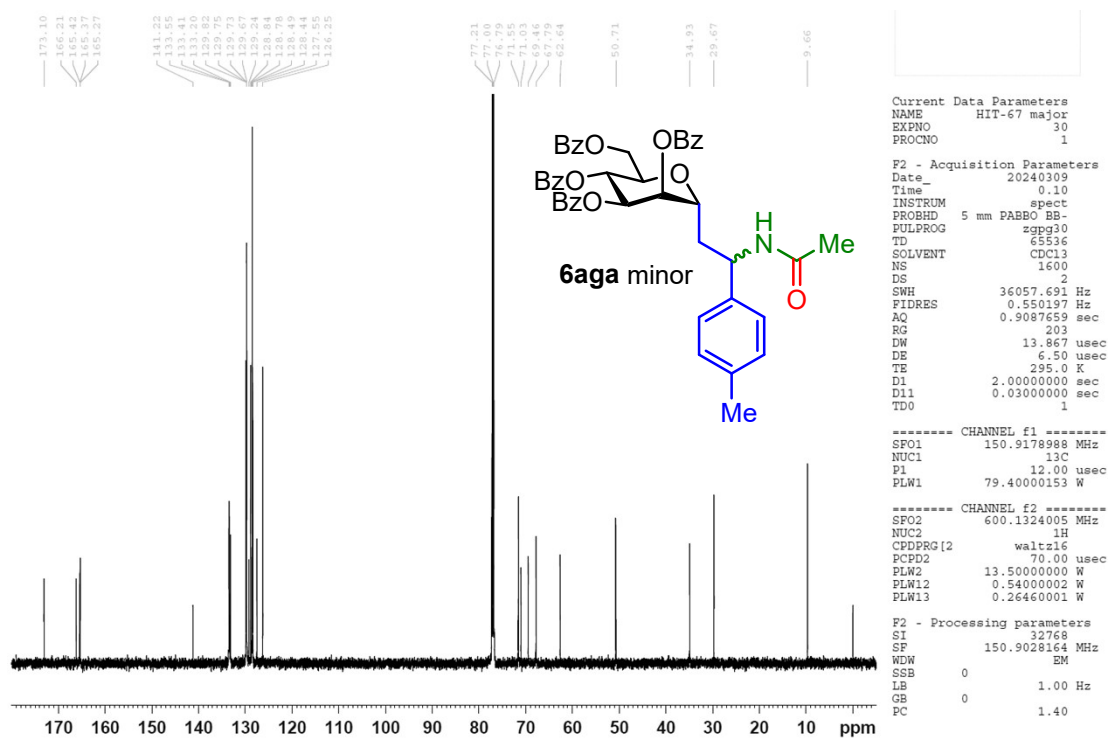

<sup>1</sup>H NMR spectra **6bba** major

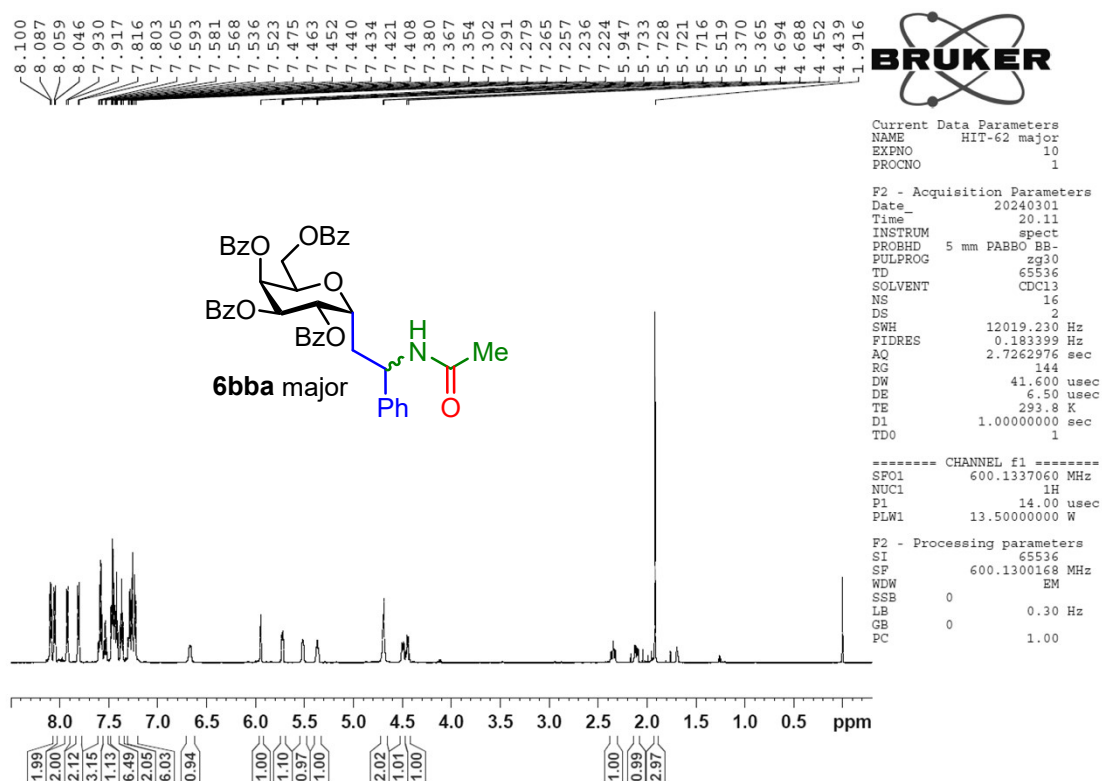

<sup>13</sup>C NMR spectra **6bba** major

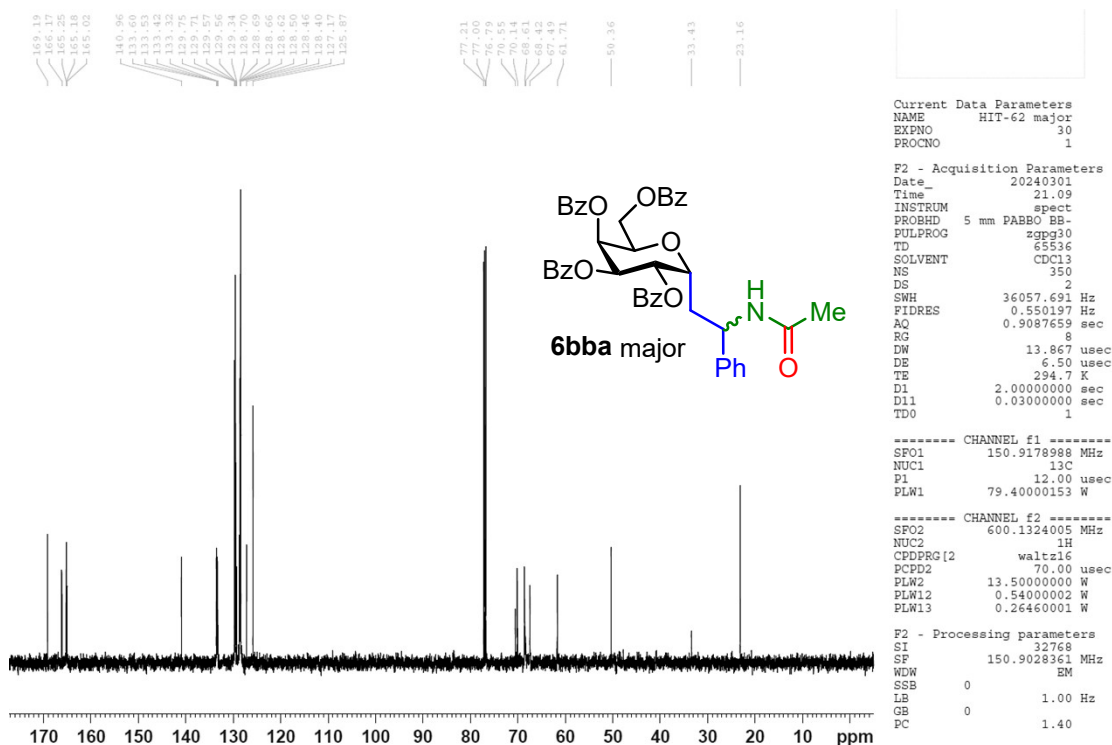

<sup>1</sup>H NMR spectra **6bba** minor

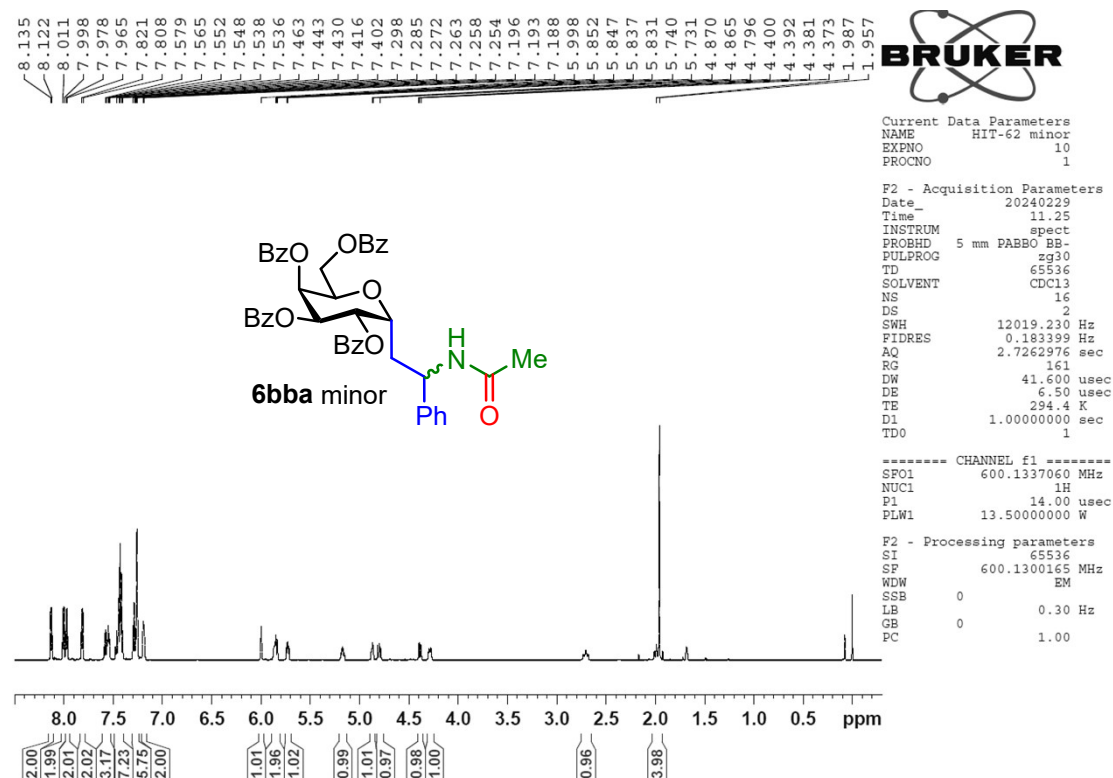

<sup>13</sup>C NMR spectra **6bba** minor

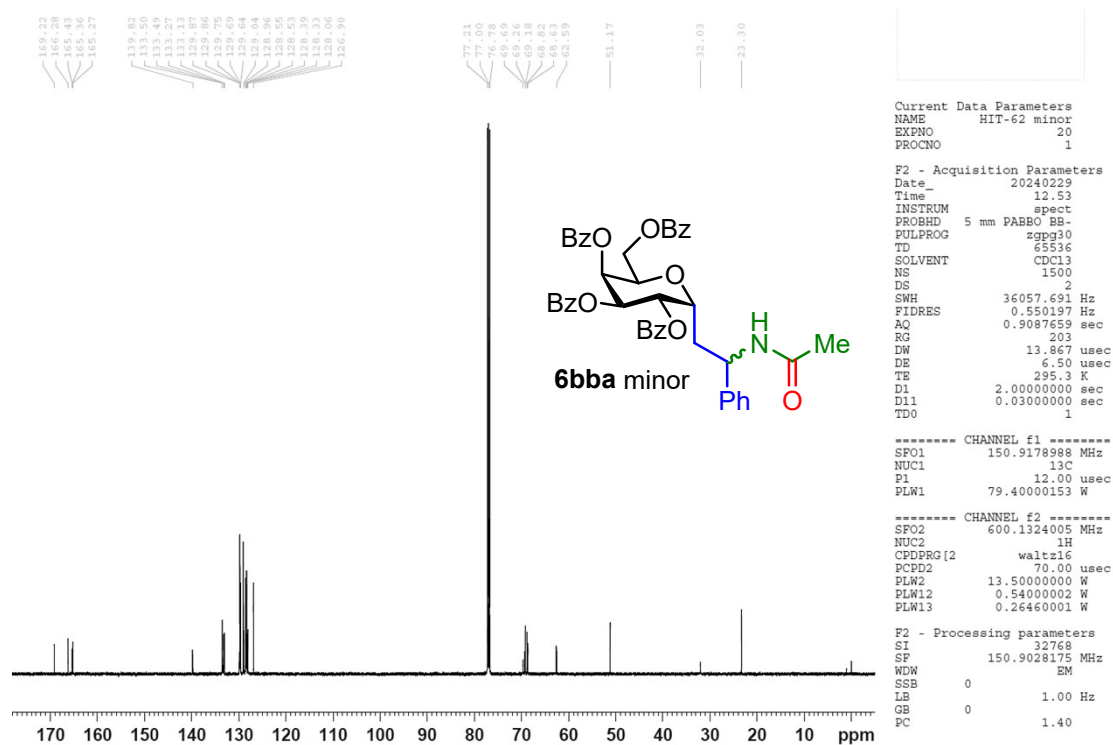

<sup>1</sup>H NMR spectra **6cba** major

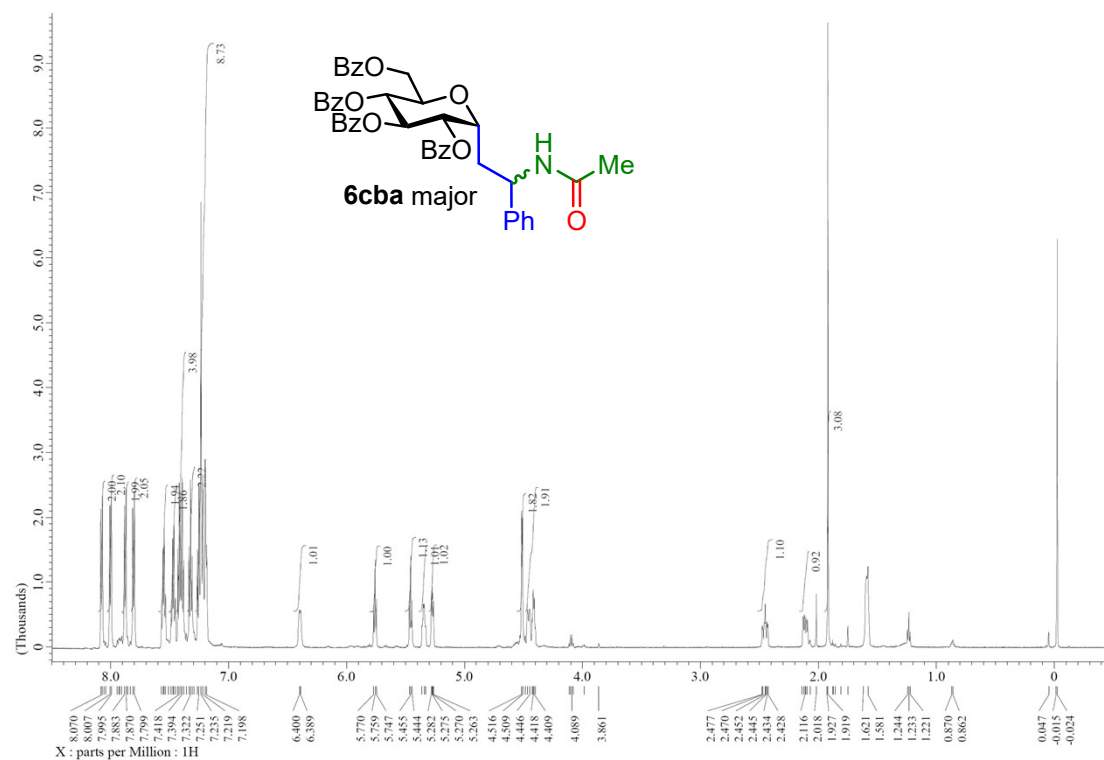

<sup>13</sup>C NMR spectra **6cba** major

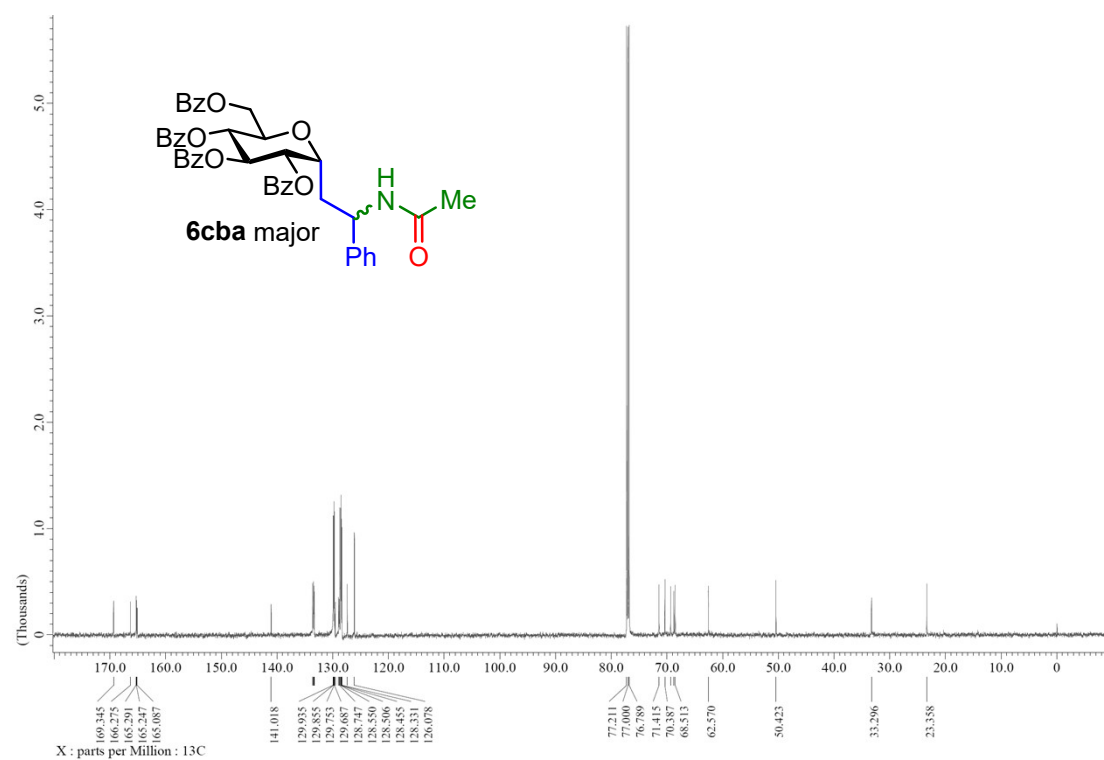

<sup>1</sup>H NMR spectra **6cba** minor

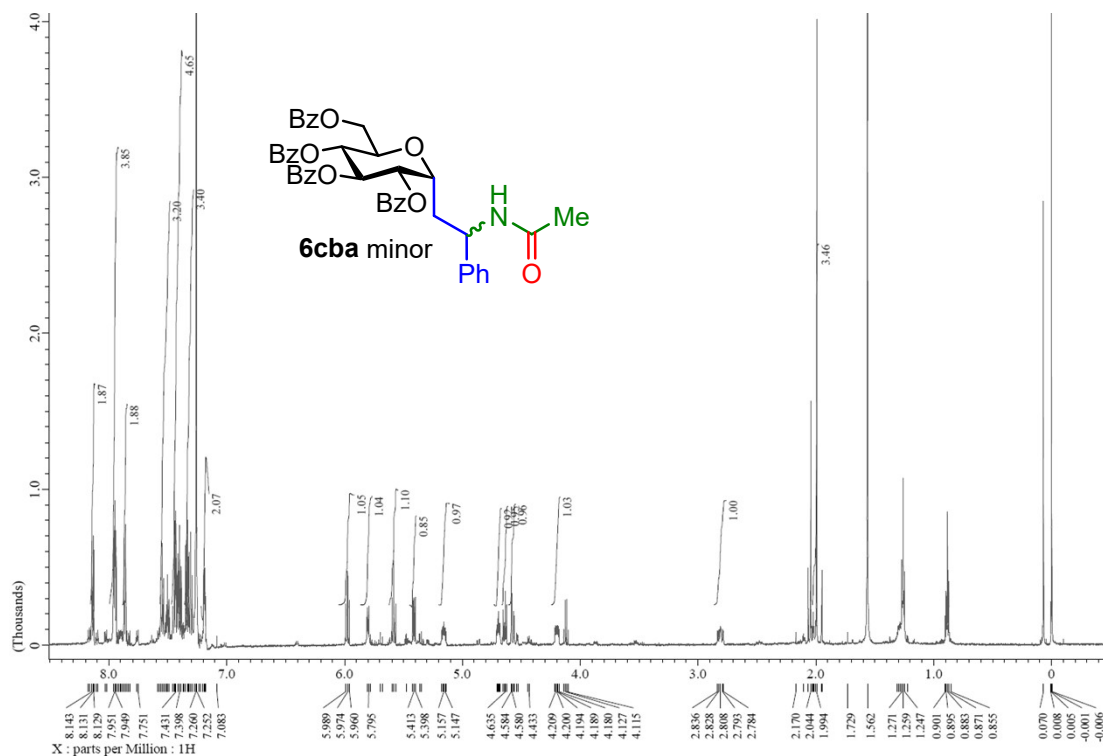

<sup>13</sup>C NMR spectra **6cba** minor

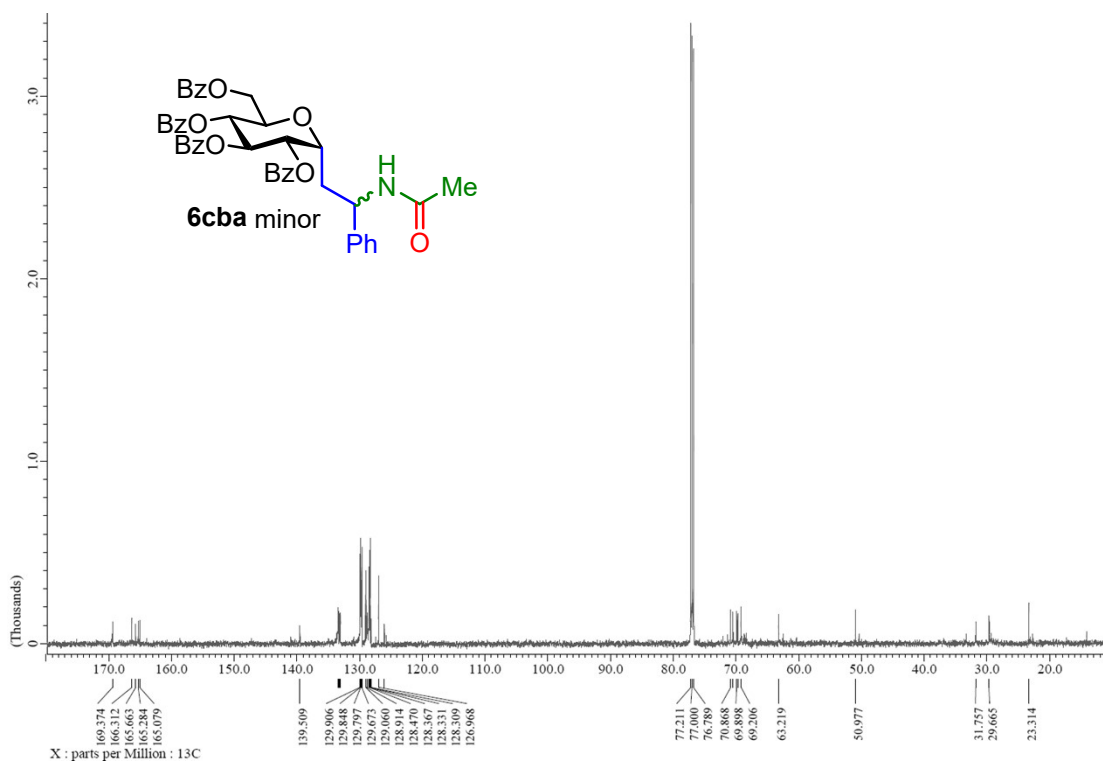

<sup>1</sup>H NMR spectra **8a**

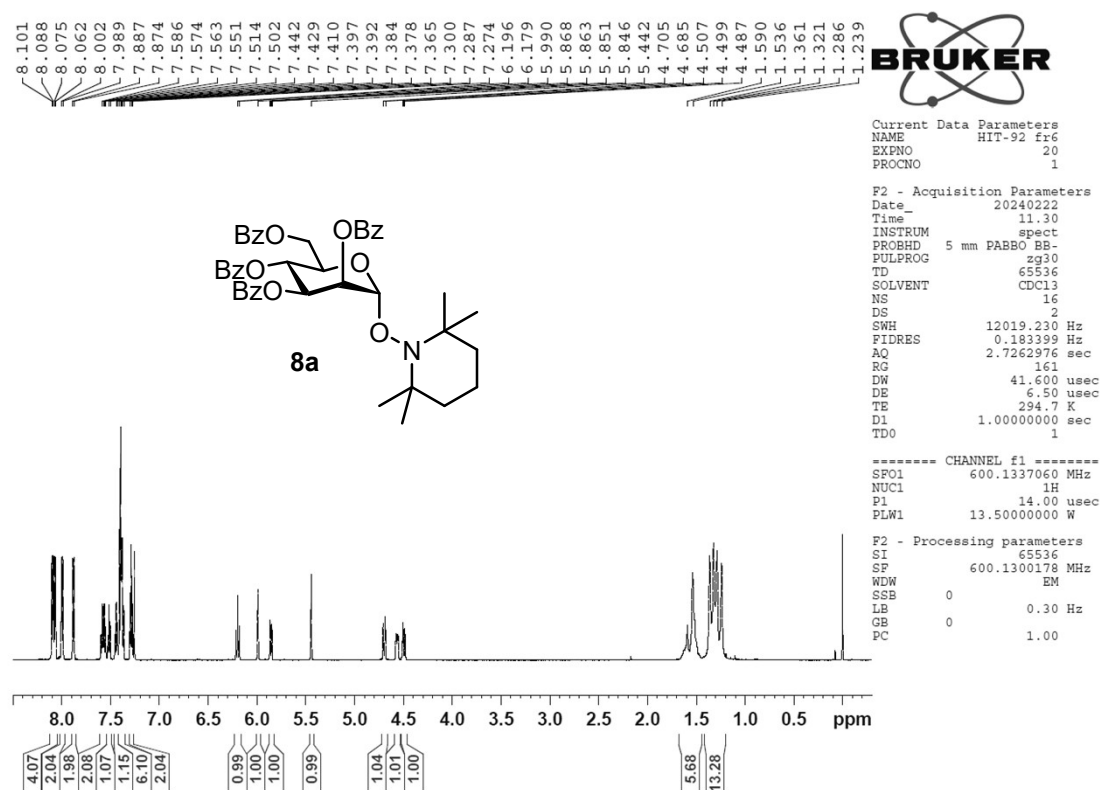

<sup>13</sup>C NMR spectra **8a**

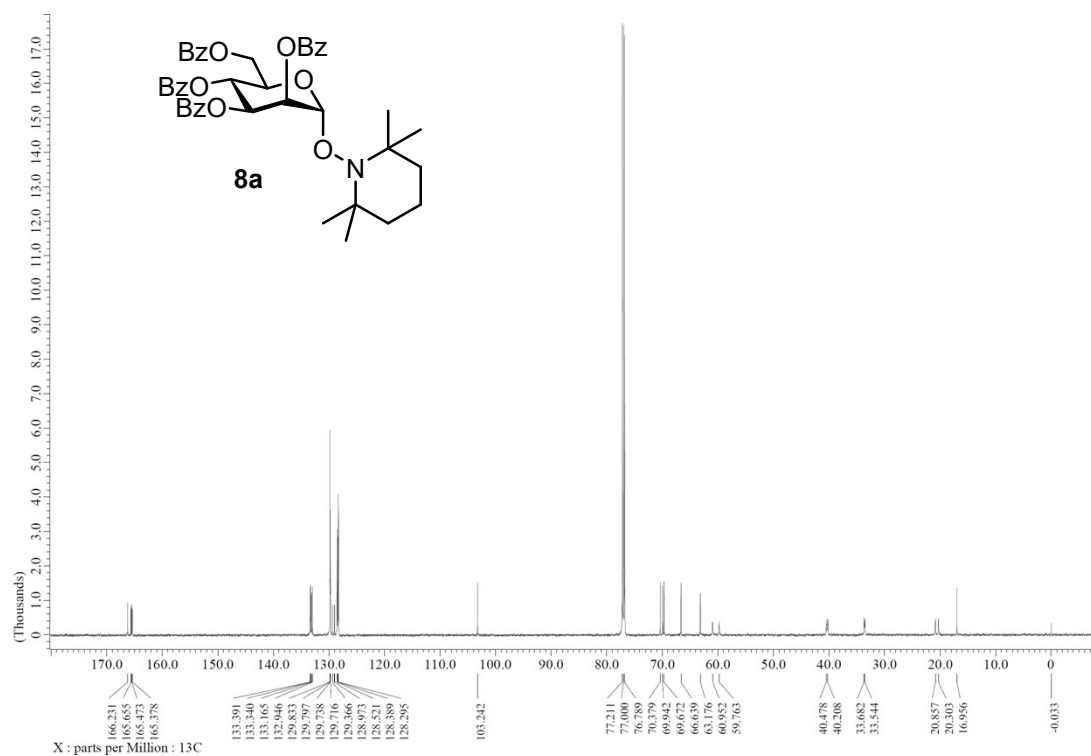

Supplement: d4cc02833c1.pdf [file d4cc02833c1.pdf]
